# Supplementary material for: Identification of condition-specific regulatory mechanisms in normal and cancerous human lung tissue
Source: BMC Genomics. 2022 May 6;23:350. doi: 10.1186/s12864-022-08591-9 (PMC9077899; doi:10.1186/s12864-022-08591-9)
Supplement: Supplementary file 1 — Additional file 1: Table S1. Unified Lung Gene Co-expression Network. Table S2. GTEx Lung Gene Regulatory Network. Table S3. LUAD and LUSC Specific GRN Edge Attributes. Table S4. All Triangle Edges Information for LUAD and LUSC Specific Nodes in Combined Networks. Table S5. Pathway Information for LUAD and LUSC Specific Nodes in Combined Networks. [file 12864_2022_8591_MOESM1_ESM.xlsx]

## Sheet: Supplemental_Table1
Supplemental Table 1. Unified lung gene co-expression network
Source	Target	Similarity_Score	Interaction	Cluster_Index	Cluster_Size	Samples	Enriched_Condition	p_value	rank
XAGE2	XAGE2B	0.9991	co	3	257	090900999009090099909909000919009909909007099900090909909099070009999000090009000099900979990009109090009990090000099909909109000009999900909090090999010099999990090909099990090990000099900999999000990007090000909999909909090009909990000000000900099978090099090901909009899099900990990900999009009090901909999999099990990900099099090000009009090090099000900009909000000009909999990900009990000909909…	GTEx_normal	3.933e-16	1
GLIPR2	OSM	0.8686	co	1	33	000000000000000800000000000000000000007000000000000000000000000000000000000000000000000000000000000000000000000000000000000000070000000000000000000000000000000000000000000008000000000009000000000000000000000000000000000000000070000000000000000070000000000000000000000000000000000000008000000000000700000000000000007000000000000000000000008000000000000000000000000000000000000000000000000000000000000…	TCGA-NORMAL	1.191e-07	1
COX8C	AC087645.1	0.9987	co	1	33	999999999999990999090999999909999999009999999999990999999990099999999999999999999999999909990999999999909999999009990999999990099900909999099999099999999999999999999999999909999999999999910999999999999799909999990999199990999999999991799999908999919900009099999990909999999999999909909999999090919009999999999999999901999999099999999999999999999909999999999999999999999999999099999999999990991999909…	TCGA-LUSC	1.012e-06	1
XAGE1B	XAGE1D	0.9146	co	1	355	910101001190911110911111111011100111099111109100101001111091111111190010001190101001011090900110119110100011911911111111001111010111101011900010011110001119011111111110190101111101110111111119101011910010119111111181110001101019111111010191111101110110111010111101119011091110000119011000110900909191011011101110101100010091191119001011001101101011119011100000109000011111119911111191910190010111900…	TCGA-LUAD	3.122e-08	1
RP11-114H20.1	RP11-363G10.2	0.999	co	1	94	999999999999999999999999999999999991919999999999999999999999999999999999999999999999999999999999999999999919999999199991999999991999999999999999991999999999999999999991991999999999999999999999999999999999999199999999999999999999999999919999999999919999999999999999999999999999999999999999999999991999999999999999999999999999999999999199999999999999999919999999999999999999999999999999999999999999999…	TCGA-LUSC	6.175e-06	1
XAGE1E	XAGE1C	0.8784	co	1	353	910101001190911110911111111011100111199111109100101001111091111111190010001090101901911090900110119110100011901911111101001111011111101011909010011000001119011111111110199101111101110111111109101011910010119101111111110001101919111111010191111001110110111010111111119001091110000119011000110990909191011011101110101100010091191119001001901101101011119001100010109000011111119911111191910190010111900…	TCGA-LUAD	2.635e-07	2
SPANXA2	SPANXA1	0.9998	co	2	61	991999990919199999999999999999999999999909799999999990919999999999999999999999999999999999999999999999999999999999999999999999999999999999999999199919999999909999999999999909909999999909999999999999999099999999999900999999990999999901099909099999999999990999999999999999999999999999999999099990999919999991909999199990919999999999999999999991999999999919999991999999999999999999999999009999099999099…	TCGA-LUSC	0.0001439	2
C2	LRRK2	0.8657	co	1	319	000000000000000000000000000000000000000000000000000010000000000000001000000100000000000000700000001010000000000000010000000000000100000000000000000000000000000000000001001000000000000009000000000000701010000000000100000000000100000000000000000010000000000000000100000000000000000000007000900010000000000000000000000000000000000000000000000010000010000010001000000010000000000000000000000000000000008…	TCGA-NORMAL	0.0003529	2
AC112715.2	AC013449.1	0.9495	co	1	33	990990999990999999909999999917099999909999990999999909909990090099999999999999999099990999999999099990909909090999099990999009999909999999099999999999999000090999009999999999999099909999999999999909009009909990099990909909000990990999009999009999999099990999090990009999900970990009909999999999999989999999990999909999999999900999909090999999909999990990099099799099099990999009990999999900099990999…	GTEx_normal	3.933e-16	2
CD93	SOX7	0.8702	co	1	420	111011101111000111011101011010111111808011001111111100011011111110011111100011110100111101008011101101011110110111100111011011101101111810107118110111110010101001111110100001101101111107110110111011110000011011110111110110101010000100111100111101011111010011011111011011111111011001011001010111111001010118111111011011100011111110101100111001111111111001110101811001111011011111111000011111010108111…	TCGA-LUAD	2.635e-07	3
HNF1B	SFTA3	0.9594	co	1	436	000000000000100010000000000100000010110000100000010000000000000000000000000000100001000070101010000001000000000000000000010010000000000000000000000000000000000000010000000110010000010009000000000000710000000010001000000000000000000000000070700000000000001000000000000000000000000000010000100000000000010000000701000000001001000001010000100010000000107000800000100110100000000110100000000010000000000…	TCGA-LUSC	6.175e-06	3
VCY1B	VCY	0.9989	co	1	51	999999199999999999999999999999999999999979099999999799999999999999999999999999999999999999999999999999991999999199999999999999999999999999999919999999999999999999999999999999999999999999999999999999999999999999999999999999999999999990999990999799999999999999999999999999999999999999999999999999999199999999999999999999999999999999990999999999999999991999999999999999999999999999999999999901099999999…	GTEx_normal	6.028e-05	3
VSIG2	NKX2-1	0.919	co	1	271	100001000000100180000000000000000000000000000000000100000000000000000000000000000000000000000000000000000000001100000000008000000008000000000080000000001000010010000000000000010000000009000000000000000000000000000000000000000000001008000000000000000001000000000000000000000000000000000000800000000010000000000901000080001000000001110000000010000001000000000000008000000000800100100100000090000000100…	TCGA-LUSC	1.579e-08	3
CACNA2D2	RAP1GAP	0.8606	co	1	304	000000000000000000000000000010000000000000000000100010000000000000000000000100000000000000000000000000000000000000010070000700000001000000000000000000010000000000000001000000000000000009000000000000000000000000000000000000000000000000000000000010000000000000000000000000100000000000000000900000000000000000000000000000000000000000000000000000000000007100000000000000000001000700000000080000000000000…	TCGA-NORMAL	0.0003529	3
TP73	ZMYND10	0.9464	co	1	444	001000000000011010000000000011001000000000000010000010000010110001011001010011000000010000001010001000000100000001100011000000001100000010001000000001000001000000000101001000000000000009010000000000001000000010000000001000000000000100011001000000010000000001001000011010100801000011000000900010000100011001100000111100010010000000001100000100100100100110000000000101000000000010000000011000000010000…	GTEx_normal	6.028e-05	4
PIP5K1B	SNX25	0.852	co	1	310	000000000000000000000000008000000000000000080000000010000000001008000001000100000000000000080000000000000000000000010000000000000000000000008100000000000000000000000001000000000000000009000008000000000001000000000800000000000000000000000000900000000000100000000800000000000000000000000100900000000000000000000000000000000000000000000000000000088000000010000000000001000000001000000000000000000000000…	TCGA-NORMAL	0.0003529	4
CSTL1	C1orf234	0.9908	co	2	44	099999999990099190999909999999999919999900990991999099999999999909999999999999999909999919909999099999900909999999999090999990900909999999999099099999999909909999919999999999999999999099999990999999999099099919999999999999999199999999091900999990999999999999999990999999999999999999999990909999999909991999999999990999990999909999990009099999099990099099099999990099090999089999998999999999099999999…	TCGA-LUSC	0.0001439	4
AC138517.1	KIAA1658	0.9658	co	1	34	999999999999999999099999909999999999999999999999999999999999999999991997999999999999199999999999999999999999999999999999909999999919999999099991099999999999990999919999999999999099990999999999919999990999990199999990909909999099999199997999999919110979999999999999999919999999999999999999999999999999999999999999999999999099999919999991009999999009999999099999999999999999900911199909999919999909990…	TCGA-LUAD	0.0008554	4
RP1-139D8.6	IFNL3	0.9419	co	1	31	999999999999999999099999999999999999999990999999999999999990999999999999999999099999999909999999999999990999999999999999999999999999999999999999999999999909999999999999999999999999999999999999999999999999990909999919919999999999999999999099099999999999999999999999999999999999999999999999999997991999900999900999990999999999999099990999999999999990999999999999990999099009999999099999099999919999999…	TCGA-LUSC	3.211e-05	5
HMHB1	HIST1H2BB	0.9692	co	1	42	999999999999999999999199099999999999999099999999099999999999199999919999999999999099999999990999919999999999999999999990999999199999999999999999999999999999090990999999919999999999999999999991999999999999909199999999999999999999999999919999999999999909199999999990999999999999999999999999999999990999199907999999909900999999909099099909999990999999999999999999799999099999999999990999999990919999999…	TCGA-LUSC	0.0001439	5
PIP5K1B	DUOX1	0.8438	co	1	323	000000000000000000000000000000000000000000080000000010000000001000000000000110000000000000007000000000000000000000010070000000000007000000008000000000000000000080000001001070000000000009000008000100801001000000000000000000000100000000000000900000000000100000000000000000000000100000000100000000700000000000000700000000000000000000000000000100000000000010000000000000000000810800000000710000000000000…	TCGA-NORMAL	0.0003529	5
MYH3	LIMS2	-0.9006	co	1	58	070000000000000010000000001000000000107000000001000000700000001010000000000000000001000000000010000000010000700007000000000000000000000000101000000001000000000000010000000000010000000009001701000700000000000000010000007000000010000000000100100000000000000100001010000000001000000000000000700001000000000011000000000000000000100000000000000000000000000000000000100000000000000000000000000000000071000…	TCGA-LUAD	0.000229	5
DNAH2	FAM166B	0.938	co	1	300	901000000000080000000000000011000000009000000900000010000000000001011000010070000000010000900000000000000100000000108001000000001100000000000000000001000000000000000000001090000000000009000900000000000000000080000000000000000000000000010000000000000010000000000000000000000000000011000000901010000000100000000000110000010010000100001000100000100100100710001000000700000009000000900000000000000000000…	GTEx_normal	0.0002592	5
FEZ1	AOC3	0.86	co	1	495	011111111111111010101111110010111111111111111111110001111101011111101101111101111010111101010111101111181111110111101181011111101111111111001111011111111111101111101111111101101111111109111111111111000110110101111111110111011110111111011101010011111111110011110101001110111111111000118011111110011011111110111111111111111111101010010111101101111181101101110111010010111111011011111011111111011111110…	TCGA-LUAD	1.833e-06	6
UGT2A2	IL25	-0.8496	co	1	35	999990999999999999999999999999999999999999999999999999999999999990999999999999999999999999999999999999999999999999999999999999999999999999999999999999999999999999999999999999999999999999999999999999999999999999999999999999999999999999999999999999999999999999999999909999999999999999999999999999999999999999909999999999999999999999999999999999999999999199999999999999909999999799999999999999099999999…	TCGA-LUSC	5.094e-12	6
DUOXA1	PIP5K1B	0.8284	co	1	323	000800000000000000000000000000007000000000010000000010000000001000000001000110000000000000007000000000000000000000010090000000000007000000007000000000000000000080000000001070000000000009000008000000701801000000000008000000000100000000001000900000000007100000000000000010070000000000080100000010700000000800000700008080000000000000080000100107000000000010000000007001000070701070708000810070000000000…	TCGA-NORMAL	0.0003529	6
TPX2	CCNB2	0.9349	co	1	611	010010110100011001000110101010010001000100010010100010001010101101011011011110010100100100018100111010100001000000110080110000011100110010010101011000100100001000100000101001101000001009100100000100001000100010100100110000000101010100010000000011110000110010110110100110100001100101000100101010000101100100000011000000110110100100000100000100001100010110101110100101001001011001010010011100001000011…	GTEx_normal	0.000985	6
CLEC14A	SOX7	0.8552	co	1	445	111010111111000111011111111011111101808011101011111100111111110110111110000081110111111101008011111111081110110111101111101111111111111811117118110011110111101101111110100111001101111109100111011110110000111111111101111111101010000101111100111101110111010001111001111011101111111011111001811111101101011118111011011111101011110110111111111010111181111001110011811000111111111011010000111111010008110…	TCGA-LUAD	2.635e-07	6
PPAP2C	C9orf116	0.827	co	1	125	000000000000000000000000000000000000000000000000000000000000000000000000000070000000000000000000000080000000000000000070000000008000000000000000000000000000000000000000000000000000000009000000000000000000000000000000000000000000000000000000000000000000000000000700000800000000000000000000900010000000000001000000000000000000000000000000000000000000100710000000000700000000800000000000000008000000000…	TCGA-NORMAL	0.0003529	7
SFTPD	SFTA2	0.9055	co	1	608	001100000000100880000000000100000010810000100001000100000000000000000000010000100001000010800000000001011100001100000070000800000010000000001910100001001000010800000001080010010000010009000000000000110110001000101000008000110000001081010080101000000001001000000000000000000009000000100008900000000000000000000801000010001008000001010000110910000100101000000000800110100000100100111800100081100000000…	TCGA-LUSC	3.211e-05	7
TCF21	GPC3	0.8614	co	2	445	011111011110101000100111010011001101101100011000100001010111111101110111111000101011111100910101110111001111108100101001111111111110111100010101010101111110010011111110011100111011110009111111111111010110000110110180111100111000111110010111910100100111010011011110100108110011111101011011011100000011100110111810101101001101111110110100101000000100100100111111011101110111000011018111111110010110111…	TCGA-LUAD	5.334e-05	7
CEP55	TPX2	0.9332	co	1	606	010000110000011001000110001010010000000000010010100010001010101101011111011110010100110100010100111010100001100000010080110000011100111010010101011000100100001000100000100001101000001009100100000100001001100010100100010000000101010100010000000011110000110010110100100110100001100101000100901010000101110101000011000000110110100100000100000100001100110110101110100101001001011001000010011000001000011…	GTEx_normal	0.000985	7
CDH5	SOX7	0.849	co	2	434	111111101111000111011111011011011101808010101111111100011111110110111111100011110118111111008011111111081110110111101111110111111111111811117118000111110111101101111110100111001101111109110111011011110000111011111110110111101010000101111100111101110111011011101101111011101111111811110001010101111001011118111011011011101011110110111011111001111111111001110000811001111111001111111000011111010108111…	TCGA-LUAD	2.635e-07	8
LRRK2	MCCC2	0.8218	co	1	347	000000000070000000000000000100000000000000000000000010000000100000000000000100070000000000000100000010000000000700000000000000000000000000000700000000000000000000000001000000000100000009000700000000000000000000000000000000000000000070000000000010000000000000000000000000000000000000000000700010000000000071000000000000000000007000000000000000000000000010000000000000000011000000000000000070000000000…	TCGA-NORMAL	0.0003529	8
RAI2	GHR	0.8545	co	2	501	111111011111101110111111110111111111801101001110101100010101111111011111101101111010110001001111101111011101011111100111010101001001111101018100011011111101111111110111111101111111111109110111111101110110111100011110011111111011811111111111010010110111010111111111110110111011010111100011010111111111111010110110111111101011110010101001010101110111111001101011011111111111010011010101110011100100111…	TCGA-LUAD	1.071e-05	8
TPX2	CDCA5	0.9327	co	1	608	010000110100011001000010101011110001001100010010100010001010101101011011011110000100110100010100111010100001000000110080110000011100110010010101011000100100001000100000101001100010001019100101000100001000100010100100010000000101010100010000000011110000110000110110100110100000100101000100101110000101100101000011000000110110100100000100000100001100010110101110100101001101011001000010011100000001011…	GTEx_normal	0.000985	8
GIMAP1	CD2	0.9193	co	2	32	000000000000000000000000001000000000001000000000000000000000100000000000000000000000000000708000000000000000000000000800000000000000000000001000000000000100000000010000000010000000000009000000000000000000000000000000000100000000000000000000000000000000000000000000000000000007000000000000800001000000000000000000000000000000000000000000000000000000000000000000000000000000000000000000000000000000000…	TCGA-LUSC	0.0005608	8
FGF2	AOC3	0.8542	co	1	568	011111111111111010111111111110111101011111110110101101111111111111011111101101111110111101011111111110100810110111101101118101181111111111010100011101111111101101110111101101101111101109111118010111001010110111110010110111101111110111111101010111111111110001111111118110110101111101110111011111811101111110110110111181101111111010001111101111111107110111111111011111111180011011010011111111011110010…	TCGA-LUAD	0.0008554	9
LAMP3	DHCR24	0.8186	co	1	321	000000000000000000000000000000000000800000000000000000000000000000008000000100001000000100000000000000000000000000010000000000000000000000000000000000000000000000000001001000000000081709000000700000001700000000000000100000000000000000000000000010000000100000000100000000000008000000000100900010700000000000000000000000000001000770000000000000000000000110000000000010000000000700070000000000000000000…	TCGA-NORMAL	0.0003529	9
TSPY8	TSPY6P	0.8866	co	1	47	999999999999999999999999999999999999999919999999999999999999999999999999999999999999999999999999999999999999999999999999999999999991999999999999199999999999999999999999999999999999999999999999999999999999999999999999999999999999999999999999999199999999999999999999999999999999999999999999999999999999999919999999999999999999999999991991999999999999999999999999999999999999999999999999999999199999999…	TCGA-LUSC	3.211e-05	9
DNAH2	WDR96	0.9289	co	1	308	901001010000010000100000000000000000000000000000000010000000000001011000010070000000010000000100001000000100000000100001000000011100000000000000000001000001000000000000001090000000000009000000000000000000000010000009000000010000000000010000000000000000000000000000000080000000000011000000901010000000100000010000100000010010000000001110100000100100100710001009000701000000000000900000000000000000000…	GTEx_normal	0.000985	9
CDH5	GPR116	0.8549	co	1	602	101101001010000110111000000001000011000000101000010100000001000000010010001001110001000081000000000100011100001100001010011010100011000001100010100110001100010110010000010010011011010109001010100000110100000000001011001000010000101011000010101000001011000000000000001000100010000001000010010001001000100000000101100011001000010001111010011001000001001000000000011000100000000110110001000011100000100…	TCGA-LUSC	6.175e-06	10
AC026202.1	TAS2R50	0.9024	co	1	31	999909999909999999999999909999999999999999099999999991990999999999999909999099999999999909999990099999999999999999909999999999999999909999999997999999909999999999999099999999999199999999909999999999199999990999990999999999999999999999999999900999999009999919999999990999999999999999999099909099919999999999999999999199979999999999999999999999999999990999999999999099999999990999999999999999990999099…	TCGA-LUSC	0.0005608	10
MYCT1	SOX7	0.838	co	1	418	011111111111000111011111001000011001808011101101111100111111110110101111000011110110010181008001111110081111110111101111111111110111111811107018110111100011001101111110100111001101111107100110101011100000011111110111111111101010000101111110111101011111010011111001111001101111111811111011010118111001011118111010011011001001111110011111111001101011111001110001801000111011111011111000011111000108110…	TCGA-LUAD	2.635e-07	10
PIP5K1B	BEX2	0.813	co	1	266	000070000000000000000000000000000000000000000000000010001000001000000000000100000000000000000000000000000000000070007000000700010000000000007000000000000000000000100000000000000000000009000008000000000000000000000000000700000100000000000007900000000007100000000000007010000007000000070000000000000000000000700700000000000000000000000000000000000100000000000000000000000070700000007000000000000000000…	TCGA-NORMAL	5.941e-05	10
PIP5K1B	EFEMP2	-0.815	co	1	355	000000000000000000000000000000000000000000080000000010800000000000000000010110000000000000000000000000000000000000010000000000080000000000000000000000000000000000000000000000000000000009000008000000000000000000000000000000000000000000000000900000000000000000000000000000000000000000000000000000000000000000000001000000000000000000000000000000000000000000000000000000000000000000000000000000000000000…	TCGA-NORMAL	0.0003529	10
TPX2	UBE2C	0.928	co	1	594	000000110100011001000010181810110001000000010010100010001010101101011111011110000100100100010100111010100001100000010080000080001100110010010101011000100100001080100000101001100000001009000100000100001010100010100100110000000101810100010000000011010000110000110110100110100000100101000100101110000101100101000011000000110100100100000100000100001100010100101110100101001001811001000010011100001000011…	GTEx_normal	0.000985	10
RHOJ	TIE1	0.8782	co	2	59	000000000000000000000000000000000000001000000000000000000000000000000000000010000000000080111000000000010000000000000000000000000000000000000000000000000000010000000000000000000000000009000000000000100000000000000000000000000010000000000000000000000000000000001100000000000000000000000000800000000000000001000000000000000000000000000000000010000000000000000000000000000000000000000000000000000000000…	TCGA-LUSC	3.211e-05	10
WDR66	SPATA18	0.9265	co	1	431	000000010000000000000000000000000010000000081011070001000000000000011001010170010000000000000000001000000001000000000000010000001100100000010101000000100000000080070000001000000071001009000100000100101000000000110087101000010100000010010000000010000000100000000000100010000000110001000100901110000000000100000001000000010000100100100100000100800100100110001110000700000000011000000000010000000000001…	GTEx_normal	6.028e-05	11
KCNJ4	SMCP	-0.8103	co	1	46	999999999999999999999999999999999999999999999999999999999999999999999999999999999999999999999999999999999999999990999999999999999909999999999999999999999999999999999999999999999999999999999999999999999999999999999999999999999999999999999999999999999999990999999999999999999999999999999999999999999999999999999999999999999999999999999999999999999999999999999999999999999999999999999999999999999999999…	TCGA-LUSC	1.66e-13	11
TPX2	KIF11	0.9269	co	1	590	000000110000011001000110001011010000000000010010100010001010101101011011011110000100110100010100111010100001000000110080110000011100110010010101011000100100001000100800100001000000001009100100000100001000100010100100010000000101010100010000000011110000110000110100100110100001100101000100801010000101110100000011000000110010000100000100000100001100010110101110100101001001011001000010011000001000011…	GTEx_normal	0.0002592	11
FMO2	GHR	0.8393	co	1	549	111111011111111110111111111011111111101101011100101111111101111111111111111101111110111111711101100111111111011011101111011101011101011101011111011011111111111111110111111101111111111109110111111101111110110110010110011111111111811111011111910110111111110111111111110110111110110111107011011110111111111011110110111111111111011110001111011111111101111101111111111111011110011111010001111081110101110…	TCGA-LUAD	1.071e-05	11
CACNA2D2	SCNN1A	0.8122	co	1	337	000000010000000001000000001100000000000000000000000710000000000000001000000000000000000100000000000000000000000000010000000000000101000000000000000000000000000000000001000000000000000009000000000000000000000000000000100000000001000000000000000011000000007000000100100000100000000000000100000000000000000000000000000000000010000000700100000000000000010000000000000010000001000000700000001000000000000…	TCGA-NORMAL	0.0003529	11
GAGE12H	GAGE12E	0.887	co	1	59	999990999999999199999999999999991999999999999999999999999999999999999999999999999999999999999999999999911999999991999999999999991999999999999999999999999999999999999999999999999999909999999999999999999999999999999999999991999999999999999999990199999999991999991999999999999999999999999990999999991999999999919999999999911999999999999991999999999999999999999999999999999999999999999999999999199199999…	TCGA-LUSC	0.0005608	11
DLGAP5	KIF4A	0.9274	co	1	632	010000110100011001000110101111010000000100010010101010001110101101011111011110010100100100810100111010100001000000110081110001011100111010010101011000100100001000100100101001100000001019100001000100001000100110100100010010000101010100010000010011110000110010110110100111100000100101000100901010000101100100000011100000110110000100000100000100001100110110101110100101001001011801010010011000001000011…	GTEx_normal	0.000985	11
ECSCR	TSPAN18	0.8433	co	1	581	011110111110110111101110110010110111111111000111111000101011011111101111111111111111111181018111111001110111111111100111011011001101111111188110111011111011101101101111111101011101111119011100110111111101110101010111110100111111011101111111000101111111010111010111111111111111111001011011011110101011011111111110111111101010110111111110111101111101111101111111101000111111011011011101011011111110011…	TCGA-LUAD	0.0008554	11
TSPY6P	TSPY10	0.845	co	1	62	999999999999999999999999999999999999999919999999999999919999999999999999999999999999999999999999999919999999999999999999999999999991999999999999999999999999999199999999999999999999999999999999999999999999999999999999999999999999999999999999999199999999999999999999999999999999999999999999999999999999999919999999999999999999999999991991999999999999999999999999999999999999999999999999999999199199999…	TCGA-LUSC	3.211e-05	12
ZMYND10	WDR66	0.9237	co	1	296	000000010000000000000000000000000000000000000010000000000000000001011000010010000000010000000000001000000101000000000000000000000100000000000000000000000000000000000001001000000170000009000000000100001000000010000000001000010000000000010000000000000000000000010000000010100100000000000000901010000000100000000000000000000001100100000010000000000100100110001000000100000000001000000000010000000000000…	GTEx_normal	1.236e-05	12
LPAR6	FXYD1	0.8863	co	1	44	000000000000000000000000000000000000101000000000000000000000000000000000000000000001000000100000000000010100000000000080000000070000000000001000000000000000000000000000000000000000000009000000000000100000000000000000000000000000000000000000000000000000000000000000000000000000000000008000000000000000000001000000000000000000000000000000000000000010000000000000100000000000000000000000000000000009000…	TCGA-LUSC	0.0005608	12
LRRK2	KIAA1324L	0.8118	co	1	348	000000000000000000070000000100000000800000000000000010000000100000000080000100000000000000010000001000000008000000010000700000000000000800000000800000000700000070001001000000000000000009000000000000700000000000000087000000000000700100000080000010100000100000000000000000000000000000000100700000000000000000000000000000000000000000700000000010000000008010010010000010000000000000000008000070000001000…	TCGA-NORMAL	0.0003529	12
CD101	RALGPS2	-0.8287	co	1	57	000000010000000100001000001010010100000000000001100000000000001000000010000000000008000000000000010000010001000000000080000001070000001000000100100000100000000000000000000000000000000009001000000000000000000000001000001000000000000000000000800010000000000000000000000007010001100000001000900000000000000108000000000010080101000000008000000000000000000000000000000007000010000000000000010010800008000…	TCGA-LUAD	1.833e-06	12
GPATCH11	FXYD1	-0.8411	co	1	40	000000000000000000000000000000000000001007000000110000000000000000000010070000070001000000100770000000010100000000000010000000000000000000000000000000010000000000000000000000010000000009000000100000100000000000000001000000010000000000000010000000000000007000000000001000000000000000001000700000007000000007007000000000000000000000000070000000000000000000000000001000000000000000000000000070000009000…	TCGA-LUAD	0.000229	12
DACH1	CLEC3B	0.8428	co	1	518	011111111100011001111111111111111101110111000010101100010101111111011101111001111110111101018118111101100010010011100001010111011110111111010101111011111111101091110110101111111111111109011118111110000110101111000100010110001100811111118111810100110011011111011101110111800111111111100011001111000111101110110111111101111010011110000180010100111181111100111111010001011110011011000001011101010110111…	TCGA-LUAD	0.0008554	12
AL354898.1	CTD-2535L24.2	-0.8051	co	1	37	999999999999999991999999199999999999999999999999999979999999999999999999999999999999999999909099999999999999999999999999999999999999999999999999999999999999999999990999999999999999999999999999999999999991999999999999999999999999999999999999999999999999999999999999999999999999990099999999999999999999199999999999099999199999999999999999999999999999999999999099999999999199909999999999999999999991999…	TCGA-NORMAL	8.631e-06	13
CELF2	MYO1G	0.829	co	1	442	000001001000000010001000010000000000010000000000000000000000000000000000000001000000000010008000000100010100001100000000001000080000000000101010100100000000010110000000000010010000000009000001100100810100000000001000001000010000100001100010011001000001001000001000001100000000000010001001000001101000000000010000000011100000000008110000011000000000000000000000011000010000100100001101000000100000010…	TCGA-LUSC	1.012e-06	13
AC013449.1	HIST1H4B	0.8348	co	3	74	990900999900999909910999999900999909709909990090999999909990999999999990999999999099999999999999000999909909990999099990999909999009999999097997999999999910090999000909999999909099909999900999099999009909099999999990910909999990999919099919099999990901091999099990099999091019909909909990099999999909099999090999999909999999919999009990000099999990990090999999790099099999999999990999999909999997999…	TCGA-LUSC	6.175e-06	13
SPEF1	DNAH10	0.9258	co	1	325	001000000009010000000000100000000000009000000000000010000001010001011091910010000000010009000000001000000810010000100001009000001000900100000000001001000018090090009001001000000009000009010900000000900000800000000900000900011101009000010000000000010000000000008000010018000000000008000000901010009011109100000900100000010911000090901100000000100100110110801000000700000080000000000000011000000000000…	GTEx_normal	0.000985	13
MS4A4A	VSIG4	0.8112	co	1	320	000000000000000010000000000000000000100000000000000010000000000000100000000000000000000000000000000010000000000000000000008000000000000000010000000000000000000000000001001000000000000009000000000000000000001000000000000000000001000000000000000000000000000080000800000000000000000000000000700000000000000000000000000000000000000000000000000000000000000010000000000000000001000000000000000000000000000…	TCGA-NORMAL	0.0003529	13
ABCA8	GHR	0.8234	co	1	562	111110111111111110101111111111110111100101111110101101011101111111111111111101111110111111011101111111111110011111110181118001101100110111111011011111111110011011100111111101111111111109111111111111111110111111010110011110111111811108111111010101111011110111111111111110111111011001100111011111111111100011110110111111111111110010101011011101111111111111111111111111011111111001111001111001111101111…	TCGA-LUAD	1.071e-05	13
GHR	AOC3	0.8221	co	1	610	111111111111111110101111110111111111101101011110101101111101111111111111111101111010111111011111101111181111111111101111118101111111011111011110011111111111111111110111111101111111111119111111101111110110110110110110011111111111111111111111010111111111111111111111111110111111111101100111011111111111111110110110111111101111010110111111011111111111111101111111011011111111011011111111111011111100110…	TCGA-LUAD	5.334e-05	14
FGF19	MAGEA10	0.8236	co	1	49	999990990999999099990999999999999999999999999999999999999999999909999099999999999999999909999999999999990999990091999909999099999099999999999909999099909999999999999099909990990909999999999999999990990999999999090999999990999999999909999990999199999999990099991909999909999999999999990999909999999909099999999999919909999990919999999901999990099990999999999999909909991999099999999909999999099999099…	TCGA-LUSC	6.175e-06	14
EPDR1	PIP5K1B	0.81	co	1	317	000000000000000000000000000000000000000000080000000010000000001000000000000100000000000000000000000000000000000000010000000000010000000000000000000000000000000000100001001000000000000009000008000100001001000000000000011000010100000000000000900000000000180000000010000010000000000000000000001010000000000000000000000000000000000000000000000100000100000100000000000000000000000000000000000000100000000…	TCGA-NORMAL	0.0003529	14
RAMP3	PTN	0.8194	co	1	437	010010111110011010111010111110110101707010100000001100011001101101801111101001000001111000818111110101010111111111000101011111011111010111111171001111011001110110111111011000101111111109111110810111010111100101011111011010111100011111111110110000011011000110010001110110000011110010011011001111101111110110101111111000011001110110011110001101100101111100111111011001110110011111011011111110011110111…	TCGA-LUAD	1.071e-05	14
BIRC5	TPX2	0.9228	co	1	598	000010110100011001000110100010010001000100010010100010001010101101011011011110000100110100010100111010100001000000110000110000011100110010010101011000100100001000100000100001000000001019100100000100001000100010100100110000000101010100010000000011110000110010110110100110100001100101000100801010000101100100000011000000110110100100000100000100001100010110101110100101001001011001010010011000001000011…	GTEx_normal	0.000985	14
KIAA1324L	PARM1	0.7964	co	1	308	000000000000000000070000000000000000800000010000000000000000000000000080000100000000000000000000001000000008000000000010700000000000000800000000800000000700000070081001000000000000000009000000000000700000000000000087000000000000700000000080000010010000000000000000010000000000000000000000700000000000000000000000000000000100000000700000000000000000008010100100000010000000000000000008000070000001000…	TCGA-NORMAL	0.0003529	15
ZFY	UTY	0.8406	co	1	182	099999090009900919000999909999001910000909001990909099909999999011109900009909091990999999999999009099910109999099991019901199979901999909999008099909900019099079019009900010919900909099997090999009999990999190901919990099999009990100909990009009991910091091901909990999000999000999919919919099990090099909199999900190999099100999990000009098999097990099009009900000099099199999101990000990099019990…	TCGA-LUSC	0.0005608	15
TPX2	MELK	0.9226	co	1	599	010010110100011001000010101010110000000100010010100010001010101101011111011110000100100100010100111010100001100000110080110000011100110010010108011000100100001000100000101001000000001009100100000100001000100010000100010000000101810100010000000011110000110000110110100110100000110101000100801010000101100100000011000000110110000100000100000100001100010110108110100101001001011001010010011000001000011…	GTEx_normal	0.000985	15
TPX2	TOP2A	0.9208	co	1	567	000000110000011001000010001010010000000000010010100010001010101101011011011110000100100100010100111000100001000000010080010000011100010010010101011000100100001000100000100001000000001009000100000100001000100010000100000000000101010100010000000011010000110000110180100110100000100101000100901010000101100100000001000000110000000100000100000100001100010110101110100101001001011001000010011000001000011…	GTEx_normal	0.0002592	15
MAOA	PIP5K1B	0.7837	co	1	294	000000000000000000000000000000000000000000000000000000001000001000000000000100000000000070700000000000000000000000010070000000010000000000000870000080000000000000170001000000000000000009000008000000700000000000000000010000000100700000000000900000000000000000000010000000000000000000000000000000000000000000000000000000000000000000800000000100000000000000000080000000000000000000000000000000000000000…	TCGA-NORMAL	5.941e-05	15
INMT	GPC3	0.8123	co	1	554	111111011110101100110111011011111101101110111110100001111111111111111111111101101011111100010111110111001111101111101101111011111110111110110101010011111110011011111111111101111111111019111111011111011100101111110110111100111110111110010111110110100111010111011110111111110011111101011011111101000111100110111110111101111101111110111110101101001100111101111111111101111111111011011111111110010111011…	TCGA-LUAD	5.334e-05	15
ESAM	GPR116	0.8251	co	1	646	100101001010100110111000010000000011010000101000010100010101000000110010001001110010000011000000000100081100001100001010011010100011000001100010100110001100110110010000010011010011010109001011100000110100000100001011001100011000101011110010101100001111000100001000001000100010000111000010110001101000110000000101101011001000010001111010011001000001001000000000811000111000000110110011000011100000100…	TCGA-LUSC	0.0001439	16
FXYD1	SLC46A3	0.8098	co	1	47	000000000000000010000000000000000000001000000000000000000000000000000000000007000001000000801001000100010000000000000080000000000000010000000000100000000000000100001000000000000000000109000000000000700000000000000100100000000010000000001010000000000000000000000000000000000000000000001000000000000000000000000000000000000000000000000000010001000010000000010001100000000000000000001000000000100009000…	TCGA-LUAD	5.334e-05	16
GHR	ARHGAP6	0.8095	co	1	554	111111111111111011111111110111111111101111110110001101100101111111111111111101111111111111010111111111181111101111101111118111110111010111111011011111101111111111110111110101111111111119111110110111110110111010010110010111111011811118111111010110110118111111111111111100101111111011100011011110111111111110110110111111011111010110101111011101111111111101111111011111111111111011111181111001111100111…	TCGA-LUAD	1.071e-05	16
TGFA	MELK	-0.812	co	1	253	011010100000001110010010101100100000001001010010110100000100010000010101100100010000001101000010100011100100010000000011101000011100111001101010010000100100101000001001000000000000010109100101010000001001000010001000010010001000000000000101011001110010001107101010000801170007001000000000801101010101107000101010010000111111010101001010000000001107000000001001111011001010700001010010010110001000010…	TCGA-LUAD	0.000229	16
LAMP3	LEPREL1	0.7812	co	1	326	000000000000000000000000000000000000800001000000000010000000000000000000000100000000000100000000000000000000000000010000000000000000000000000000000000000000000000000001001000000000000009000000700000801001000000000000800000000000000000000000000010100000100000000100000000000000000000000100900010000000000000000000000000000000000000000000000010000100000010000000000000000000000000070000000070000000000…	TCGA-NORMAL	0.0003529	16
DLGAP5	ASPM	0.9206	co	1	622	010000110100011001000010001110010000000100010010101010101010101101011101011110000100110100810100111010100001000000110081110000011100110010010101011000100100001000100000101001100001001019100000000100001000100010100100010000000101010100010000010011010000110010110110100111100001100101000100901010000101100100000011000000110110100100000100000100001100010110101110000101001001011801010010011000001000011…	GTEx_normal	0.000985	16
TSPY1	TSPY4	0.8224	co	1	50	999999999999999999999999999999999999999919999999999999999999999999999999999999999999999999999999999999999999999999999999999999999991999999999999999999999999999199999999999999999999999999999999999999999999999999999999999999999999999999999999999199999999999999999999999999999999999999999999999999999999999999999999999999999999999999991991999999999999999999999999999919999999999999999999999999199999999…	TCGA-LUSC	3.211e-05	16
TAL1	ZNF428	-0.8085	co	1	38	000000000000000000000000000000000000007000700000000000000000000000000000000000000000000017701000000007000000000000087100000000000000000000007000000000000000000007000000000000000000000009000000001000800000000000000000001000000080100000100000007000000000000000000000000000000000000000000000700001000000007007007700000000000000000000000000000070000080000000000000700000000000000000000000000000000007000…	TCGA-LUSC	3.211e-05	17
ABCA3	LAMP3	0.9194	co	1	432	010000100000001000000000100110000000800000010000000011000100000000000000110100001000080100000100001001100000000000010100000000100100010000800000000001010000000000000001001000001010001009010000700000801011000000010000800000000110000000000100000110100000100000080800000001000001000000010100900010000100000010000000000100000010000000000000000000000100100110011000000110000010000000070000000000001000000…	GTEx_normal	0.0002592	17
CCM2L	SOX7	0.798	co	1	430	111111110111000111001101011011011101808010101111111100011111110110101110000010110111110111008011111100081110110111101811801001111111111811117108110110110011101101111110000181001101111109100110108011110010111011110111110111101000000101101110110101111111010011111011111011111111111811110010710018111001811118111011111011081111111110111101111001011081011001110101801000111111800811111000011111010108110…	TCGA-LUAD	1.833e-06	17
USHBP1	SOX7	0.7871	co	1	415	111111111101000101011101111011011101808011101001111100011111110110101111000010110111111111008011111000011111110111101111101111110110011811117111100011110111101101110110100111001101101109100110101011110010111110101111110101101000000001101110111001111111010011111011111111110010111111111011010011111001111118110011000011011111111110111101111001011011011001110101811000111011101111011001101111110008111…	TCGA-LUAD	2.635e-07	17
PRSS33	C9orf53	-0.7791	co	1	33	999999919999999999999999919999999999099999099999999999999999999999099999999999999999999999099999999999999999999997999999999999999999999999999900999990999999990999999900999999999979999999999909999999999999990799999999999999909991999999199999099999999999999009999999999999909999999990099999999990999099999999099999999999999991999999909919999999999999999999999199999999999999999909999999991999099999999…	TCGA-NORMAL	0.0003529	17
CEP55	CCNB2	0.9203	co	1	635	010000110000011001000110101110010001000010010010100010101010101101011111011110010100100100018100111011100001110000010000110000011100111010010101011000100100001000100100100001101100001009100100000100001001100110100100010000100101010100010000000011110000110010110110100110100000100101000100901010010101100100000011000000110110101100000101000100011100110110101110100101001001011001000010011100001000011…	GTEx_normal	0.000985	17
KIAA1324L	LEPREL1	0.7747	co	1	319	000000000000000000070000000000000000800000010000000000000000100000000080000100000000000000010000001000000008000000010010700000000000000800000000800000000780000070081001000000000000000009000008800000700000000000000087000000000000700000000080000010010000100000000000010000000000000000000000700000000000000000000000000000000100000000700000000000000000008010000000000000000000000000000008000070000000000…	TCGA-NORMAL	0.0003529	18
SASH1	NPM3	0.8072	co	1	92	000000000000000000000000000000000000008000000008000000000000000000000000000000000000000080800000000000000000000100000000000000800000000000100000000000000000000010010000000010000000000009000000000008000000000000000000008000000800000001000000000000000000000000001000000000000000000000000000000000000000000000000000000080000000000000100000000000000000000000000000000000000000000000000000000000000100000…	TCGA-LUSC	1.393e-07	18
CEP55	MELK	0.9188	co	1	597	010000110000011001000010001010010000000000010010100010001010101101011101011110010100100100010100111011100001110000010000110000011100110010010100011000100100001000100000100001001000001009100100000100001008100010100100010000000101810100010000000011010000110000110100100110100000100101000100901010000101100100000011000000110110000100000100000100001100010110101110100101001001011001000010011000001000011…	GTEx_normal	0.0002592	18
DNAH2	ROPN1L	0.9194	co	1	285	901000000000000000000000000001000000000000000900000000000000000001010000910010000000000000000000000000000100000800100001009000001100000000000000000001000001100000000000001090000000000009000000001000000000000010000000000000000000000000010000000000000000000000000000010000101001000010000000900010000000100000000000100000010010000100001000000000100100100110000000000101000000000009900000000000000000000…	GTEx_normal	0.000985	18
ADAMTS8	NTRK2	0.783	co	1	378	111011110110111101101010001111111111000019111011111101001110011101011101010101110110101011019111110110100111011010100111110111111101110111009181011101111101000000110011001101111111101109011111110110101010100111001000010111101110011119011101011111111001000100100100110100100110111001001110011111101111108010110010111101101110011110001110011101100101111000111101011001111110011001100111110011111111010…	TCGA-LUAD	3.122e-08	18
TMEM189	FXYD1	-0.7734	co	1	31	000000000000000100000000000000000000101000000000000000000000000000000000000000000001000000100000000000010100000000000010000000000000000000000000000100000010000000000000000000010000000009000000000000100000000000000000100000000010000000000000000000000000000000000000000000000000000000011000000000000000000001000000000000000000000000000000000000000010000000000000100000000000000000000000000000000009000…	TCGA-LUAD	3.122e-08	19
GIMAP6	GNG2	0.8083	co	2	69	000000000000000000000000000000000000000000000000000000000000000000000000000000000000000000100000000000000000000000000000000000080000000000000000000000000000010000000000000000000000000009000000000000000000001000000000000000000000000000000000000000000000000000000000000000000000000000000000700000100000000000000000000000000000000001000000000000000007000000000000000000000000000000000000000000000000000…	TCGA-LUSC	0.0001439	19
PTPN13	RECQL4	-0.9144	co	1	46	000000010100000000000000000000000000000000000000000000000000000000000071000000000000000000000000007000000000100000000000000000000000000000000007700000000000000000000000000000000000000009000000780000000000000000000700807010000000700000000000000000000000000000000000000000000000000000000000700007700000007000000010000000000000000000700000000000000000000000000000007000000000000000000000000000000000000…	GTEx_normal	5.901e-10	19
PTPN21	BRI3	0.7989	co	1	91	100000100000000000001000000000000100100000000000000000001000100010100000000000000000000000001000000000010000000010000000000000000000000000100010100101000000100010010000000010000000000009100000100000000000001000000110000000000000700000001000000000000001000100000000000100000000000000001000700001000100100000001000000010000100000000000000010001000000007000000000000001100000001101000000000010000008000…	TCGA-LUAD	0.0008554	19
CACNA2D2	LRRK2	0.7731	co	1	351	000000000000001000000000001100000000000000000000000010000000001000001000000100000100000100010000001001000000000000010000000000000100000000000000000000000000000000000001001000000000000009000000000000001001000000000000100000000000000000000000010010100000100000010100000000000000100000000100000010000000000000000000000000000000000000000000000000000000000010001000000010000001000000000000001000001000000…	TCGA-NORMAL	0.0003529	19
LIMS2	ABCC5	-0.7834	co	1	45	000000000010000100000000000000000000101000000000000000000000000000000000000000000001000000000000000000010100000000000010000000000000000000101101000100000000000000000000000000010000000009000100000000000000000000000001000000000010000001000000100000000000000000000000000000000000000000000000000000000000000011000000001000000000000000000000000100000000000000000000100000000000000001000000000000000101000…	TCGA-LUAD	1.071e-05	19
FANCD2OS	AP000679.2	0.7976	co	1	32	999999990999999999999999999999999999999999009999999999999999999999999199999999999999999909999999999999990999999999999999999999999999999999999999999999999999990999099999999999999999999909909909999099099999999999999999990999909099999910999999999099999990999919999999999999199199099999999999990990909999999999999999999999999999999999919099990999999099999999099999999999999999999999999999999999999999099…	TCGA-LUSC	1.012e-06	19
TAL1	RAPGEF4	0.7928	co	1	106	100000000000000000000000000000000000000000000000000000000000000000000000000000000000000080001000000000081000000100700000000000000000000000100010000000000000000000001000000000000000000009000000000000100000000000001000000000000000800000000000000000000000000010000000000000001000000000000001000008100000000000000000000000000100000000000000000000000011000000000000008000000000100800000000000000100001000…	TCGA-LUSC	1.012e-06	20
CDKN3	CDH3	-0.7743	co	1	262	100000000001100100010110100100000011001010001001110100000100100010010110100101010010100100111111100110100100110100000000010001011001100010001011100000110100101000001001101001000011000009100101000000001001000000101000110100000000000011011001000000010010011001000100108001100100101010100001001100100101110011100011000101101010010111100010100001001111100010010001001010001101700101000010010171001000110…	TCGA-LUAD	5.334e-05	20
PLLP	LITAF	-0.7727	co	1	320	000000000100000000000000000000000000000000010000000000007000001000000001010000000000000000000000000000000000100000010070000000000000000001010000000000000000000000000000001000000010000009000000000100001000000000000000100000000100000000000000000000000000008000000000000011000001000000000100001010000001000000100000000000000000000000000000000000000100010000000100000000000000000000000000000000000000000…	TCGA-NORMAL	0.0003529	20
BIRC5	UBE2C	0.9187	co	1	620	000000110100011001000010188110110001001000010010100010001010101101011811111110000100110100010100111110100001100001010000110080011100111010010101011000100100001080100100101001100000001019100100000100001000100000100100110010000101810100010000000011010000110011110110108110100001110101000100801110000101100100000011000000110100100110000100000100001100110100101110100101001001811001010010011100011000011…	GTEx_normal	0.000985	20
SENP5	WDR53	0.8077	co	1	746	101101100000100110101111010010100001110011100101010100010001010011100000000001100011001011101100000000001010001110000111101111100011101000101010111100011010110111110101010110111101110119000010100011110100111101101010001001100010101001100110101001001111001110001101110000001111001110110001711000011010011001111101010110081001110111111011110010000011001001001000101010111101000110110100000100110111100…	TCGA-LUSC	0.0005608	21
CACNA2D2	PARM1	0.7722	co	1	344	000000010000000001000000000100000000000000000000000010000000001000001010000100000110000000000000001000000001000000010000000000000001000000000000000000010000000000100001000000000000000009000000000000000001000000000000000000000001000000000000000011000000100000000000101000100000100000000100000010000000100000000000000000000010000000000110000100000000010100000100000000000001001000000000001000000000001…	TCGA-NORMAL	0.0003529	21
BIRC5	CDCA5	0.9179	co	1	619	010000111100011001000010100010110001001100010010100010001010101101011011111110000100110100010100111110100001010001110000110000011100111010010101011000100100001000100000101001101010001019100101000100001000100110100100110010000101010100010000000011110000110001110110100110100000110101000100001110000101100100000011000000110110100100000100000100001100010110101110100101001101011001010010011100010001011…	GTEx_normal	0.000985	21
RP1-32I10.10	TCP10L2	0.7637	co	1	31	999999999999199909999999999999009909999999909901199999999999990999999999999090999979999199919991990999999999999099999999999990099999090999999999999999109999999199099999999999999099091909919999999999999909090999999999999199999999999999911099999909999909999099999990090999999999919099999199999999990979199999999999199901999999991099799909999999999909999999999010999999999999919999999901999990999999999…	TCGA-LUAD	2.635e-07	21
HTR3C	FETUB	0.7855	co	1	31	999999999999999999999999999990999090999999909999999999999990999090999990909999999999000999999999999990999999999990999999999999999999999999999990999999999909999900909999990999999999999909999999990999990909999999999999909999999099999999999999999999999999999999999999999909999909909999999990990099999999999999999999999999999999999909999999099919999099999099999909999999099999999999999999999199099999999…	TCGA-LUSC	5.094e-12	22
ZMYND10	TSPAN1	0.9174	co	1	407	011001010000010000000000000001000001000001000000100010000010010001011000000010000000010000000100001000000810010001100071007000001100000001001000001001000011000000000101000010100100000009010000000000000000100110000000000000001000000000010000000000010000000000010000000010000101000010100000900010000001000000100000100100010011101000000110000000100000100110001000000101000000000000000000011000000000000…	GTEx_normal	0.000985	22
RAD51	CCNB2	0.8073	co	2	715	101101000110100100110001010001101010110011101101011101000101010010100000000001101011010011108010000000011010101100001111001111100011001001101000100011011010110010011011011110010011110109011010111111110110000001011011001011011010100011101111101100001111001100001001011001011111010010011000900101101010011010111100111111001001010001111000111000000011001001010000011000110010100110101101100011000011100…	TCGA-LUSC	0.0005608	22
SLC16A14	NCAPH	0.7679	co	1	87	000000100000001070010000000010000000000000000008100000001100001000000710007007000010000000000010110101000101000000000001011000810100010000000100000000000700700700100000000000000007010009001111100000000000000000000000000100000000000000011000000000100000100000000010001100100010100000000010000700100000000110000000000000000008010000100000000101000000000000010010000000000000010000000001000070000000800…	TCGA-LUAD	1.071e-05	22
CHEK1	GYLTL1B	-0.7726	co	1	248	110100101111110000000100101101180001101100001100101000010010001100100000101000100101000000100000100011110000110001001080110000001110110010000000001111101100001010000000010100011000000019101011100000000101000110000010011011010000101000010010100001000100100001010101100100100000111101000000010100010111110101000110101000001010111000110001100010000000100000001000100001001000010000100100110000000001001…	TCGA-LUAD	5.334e-05	22
PLLP	FAM105A	0.7701	co	1	307	000000000000000001000000000000000000000000080008001000000000001000000000000000000000000000010000010000000000000000110000000000000000000001000800000000000000000000000000000000000000000009000108000000000000000000000000000000000000000000000000000000000000108000000000100000000001100000000100000000700000000800000000000000000010000000000000000100000008000000000100000008000000000000000000010000000000000…	TCGA-NORMAL	0.0003529	22
DLGAP5	CEP55	0.9174	co	1	632	010000110000011001000110001110010001000800010010100010001010101101011111111110010100110100810100111010100001110000810088110000011100111010010101011000100100001000100100101001101000001089100101100100001001100110100100010000100101010100010001080011010000110010110110100110100001100101000100901010000101100100000011000000111110110100000100000100001100110110101110000101001001011801000010011000011000011…	GTEx_normal	0.000985	22
KANK3	KRBA1	-0.7617	co	1	31	700000000010000000000000010000000000009000000000000000000000000000000000000000000000000000000000000000000000100000000800000000000000000100001000000000000000010000000000000000010000000009000010000000000000000000010000001100010018000000000000000000000000000000000000000000000000000100000000801000000100000008001700001000000000000000000000001010000000000000000000700000000000100000000000000000000000000…	TCGA-LUAD	1.833e-06	23
HNF1B	PLA2G1B	0.7891	co	1	434	100900000000100900000000000000000000900000100001010000000000000000000000000000100009000090900010000000010000000008000000000090000001000000001090100000001000010800000000000010010000010109000000000000000000001000001000000100100000001000000090001000000000001000000000000000000000000000000000900001800000000001001901001011001000000101010000110000000001100000000000900010100000100100901000000090100009000…	TCGA-LUSC	1.012e-06	23
SLC16A14	ORC1	0.7626	co	1	79	000000100000001070010000000010000000000000000008100000001100001000000710007007000010000000000010110101000101000000000000011000110100000000100100000000010700700700100000000000000007000009001001100000000000000000000000000100000000000000011000000000100000100000000010001000100010100000000010000700101000000110000000000100000000010000000000000101000000100000000010000000000000010000000000000070800000800…	TCGA-LUAD	1.071e-05	23
TPX2	CDC20	0.9166	co	1	601	000010110100011001000110101010110000000100010010100010001010101101011001011110000100100100010100111010100001000000010080110000011100111010010101011000100000001000100000100001000000001009000100000100001001100010100100010000000101010100010000000011110000110011110110100110100001100101000100801110000101100100000011000000110100100100000100000100001100010110101110100101001001011001010010011100001000011…	GTEx_normal	0.000985	23
CACNA2D2	C2	0.7665	co	1	334	000000000000000000000000000110010000000000000000000010000000000000001000000100000000000000700001001001000001000000010000000000100100000000000800000000010000000000100001000000000000001009000000000000701000000000000000100000000001000000000000000010000000100000000000100000000000100000007000900010000000000000000000000000000010000000000000000100000000000110000100000010000000011000000000011000000000008…	TCGA-NORMAL	0.0003529	23
VEPH1	GNAI2	-0.7651	co	1	342	000000000000000700000000000000000000000000000000000010000000000000000000000100000100000000007000000000000000000000000000000000000000000000010000000000000000000000000001000000000000000009010000000000000000000000000000000000000000000000000000000010000000000000000100000000000000000000000100900000000000000000000000000000000000000000000000000000000000000010000000000000000001000000000000000000000000000…	TCGA-NORMAL	0.0003529	24
NPIPB15	SERPINB5	-0.793	co	1	242	001991000000010010000000909000001900009009100900009001000000990009010001090001100001090909901900000000000000190091091090000010000010000080001011000191901000000910000000900000000000000009000010919100901900909190000910001008009099900001001000000900001000000000008000091009000000000009099091100011900000000019019100009900000000900090100000000001000100000000000011000110100000009009109910110990100000100…	TCGA-LUSC	0.0005608	24
UBE2C	CDC20	0.9159	co	1	601	000000110110011001000010181110110000001000010010100010001010101101011101111110000100100100010100111010100001100000010000110080001100111010010101011000100000001080100000100001000000001009000100000100001000100000100100110000000101810100010000000011000000110011110110100110100000100101000100801110000101100100000011000000110000100100000101000100001100010180101110100101001001811001000000011100001000011…	GTEx_normal	0.000985	24
FEZ1	ARHGAP6	0.7596	co	1	401	011110110111110010101111110010110111011101000111080000001101011111101011100001111111111101010111111101180111110110101011001111110011111110101081011110101111101101101110100100111101111009101110110111110110111001011111111111111010011110011111000001110111010011010111101100101110111000111011010110011011110111111110101111001111101110110111111100001011011101111111010010111110101011111001111181010111111…	TCGA-LUAD	3.122e-08	24
MIP	ACER1	-0.7921	co	1	82	099999909999999990990099990919999990999999999999999999099999999009999190999099990999799909999909990909999999999999909999999999099910000990999999990199999909990999999999999999909999909999999999909999990999999999999999999099999990990999909999999999909009999999999090099900099999999099999999999009999909919999999109909999999990999909999900199079999919099999099090999999999999999100999999999999090999999…	TCGA-LUSC	0.0001439	24
PIP5K1B	RPS6KA2	0.7629	co	1	288	000000000000000000000000000010000000000000000000000010001000001000000000000100000000000000000000000000000000000000010000000000010000000000000000000000000000000000100001000000000000000009000008000000001001000000000000000000000000000000000000900000000000100000000010000000000000100000000100000010000000000000000000000000000000000000000000000100000000000000000000000000000000000000000000000000000000000…	TCGA-NORMAL	5.941e-05	24
CHEK1	DUOX1	-0.7631	co	1	449	110110101101111001100111101011101001001101010110111000101010100110010111101001000101100110117101111111100001110111101070111111011117101111111010011100100110011110110000110071100111000019101011101001100100111110101111011111010000110101010100011001001101011001100111110100111001001111111001111101711101111001101711011111111011011110100101000001011111111001000101101001001111100111111111711010010101110…	TCGA-LUAD	0.000229	24
CEP55	KIF11	0.9159	co	1	607	000000110000011001000010001010010000000000010010100010001010101101011101011110000100110100010100111001100001110010010000110000001100110010010101011000100100001000100100100001001100001009100000000100001001100110100100010000000101010100010000000011110000110000110100100110100001100101000100901010000101110100000011000000110110101100000100000100001100110110101110000101001001011001000010011000011000011…	GTEx_normal	0.000985	24
SSX4B	HTR6	-0.7871	co	1	33	999999999999990999999999999990999990999999990999999999999900999909999999999999999999999909099999999999999999999999099999999999999999999999999909999999999099999999999999999999999999999999999999999999990199099999999999999999999999999999999999997999999099999999999999999999999999999999999999999999099999999999919990999999999999909919999999999999999999999999999999999909999999999919999999999997999999999…	TCGA-LUSC	6.175e-06	25
ALDH3B1	SPI1	0.78	co	1	362	100000000000000800000000000000000000100001000000000100000000000000000000000000000001000000808000000000000000000110000010000000080001000000000010000000000000000000000000000010000000000109000000000000810000010000101001000000000000000000000000001000000000001000000000000000001000000000000000000001000000000000000000000010000000000001000000000000000000000000000001000000000000000100000000000000100000000…	TCGA-LUSC	1.006e-10	25
CDCA8	CCNB2	0.9149	co	2	597	010000110000011001000110101110010000000100010010100010001010101101011101111110010100100100018100111010100001010000110000110000011100110010010180011000100100001000101100100001000000001009000101000000001001100110100100110000000101010100010000000011110000110011110110100110100000100101000100800010000101100108000011000000110100100100000100000100001100110110101110000101001001011001010010011100001008011…	GTEx_normal	0.000985	25
PIP5K1B	FAM105A	0.7606	co	1	303	000000000000000000000000000000000000000000000008000000000000001000000000000000000000000000000000000000000000000000010000000000010000000000000800000000000000000000100000000000000000000009000008000000000001000000000000000000000000000000000000900000000000100000000000000000000000000000000000000000700000000800000000000000000000000000000000000100000008000000000000000008000000000000000000000000000000000…	TCGA-NORMAL	5.941e-05	25
CLEC14A	SEMA6D	0.7611	co	1	470	111111111110110110111111018001110101011100101100101101110111111111110110111000111011111100001111010011180111111111000101011011011111111101101100111111111111101011001110111111111111011119111111810110010100111111011110111010011000111111011110100000111018010011011111111111100111110011111001811111101111001010111110111100111111110010111010001101011118111101011001011101111010001111110111111001110110111…	TCGA-LUAD	1.071e-05	25
CD93	KDR	0.7915	co	1	668	100001101110110111100000001010100011011000110010011100010100111010000111001010111110001110018110011000001101001100000010000011010101001100100010101000000100010110011100111111100010101109001010101110110100100100011100001100110001101010001110101100011011010100001800101011000010100101010010011008100100110010001100010010001118011101110110000101010011101100101001010001000011100101110011001010100100100…	TCGA-LUSC	0.0005608	26
SCNN1A	PIP5K1B	0.7602	co	1	285	000000000000000100000000000000000000000000010000000710001000000000000001000100000000000000000000000000000000000000000000000000000000000000000000000000000000000000000001000000000010000009000008000100001000000000000000001000010000000000000000900000000000007010000000000010000000000000000000000000000000000000000000000000000000000000700000100100000100000000000000000000000000000000700000000000000000000…	TCGA-NORMAL	5.941e-05	26
CEP55	KIF4A	0.9147	co	1	621	010000110100011001000010001011010000000010010010100010001010101101011111011110010100100100010100111011100001000000110000110000011100111010010101011000100100001000100100101001100000001009100000000100001001100110100100010010000101010100010000000011110000110010110100100110100000100101000100901010000101110100000011000000010110000100000100000100001100110110101110100101001001011001010010011000001000011…	GTEx_normal	0.000985	26
LDB2	HOXA4	0.7612	co	2	469	011010001100110000111101101011110111700110011110101100001111111101111111001001110110111001001171111101000011110011101001111111181000110111018109111011110010110010111010111100111111111009111111180111000000011001110810111110110180011101010001010001001110000001111110100111101111110110111010011110010111111118111010101111081111101100100110001101111188111101111111711001010111111011101100111111000107111…	TCGA-LUAD	0.000229	26
DMRT1	MAGEA2	0.7826	co	1	93	991991999999999999099999999999999999999999999999999999909999999919990999999999999999999909999999999999900909999990999919999999990999999999999909099099999999999999999999999999999099999999999999999199999999999999999990999919999999999990099999990999990909991999999999999099999999999999999990999999999999999999990999909999999999099999990990919909999999990999999999999999099990999099919999009990099009999…	TCGA-LUSC	1.393e-07	27
FEZ1	PLAC9	0.7589	co	2	531	111111111111111180111111111010111111110111111111110001011101111111001111111101111110111111011111111011180111110111100111111111111101111111101111011101111111101111111111111111111111111009111111111111110110110101111118111111111100111111011111110101111011010111011101118101111111111110111010011111101111111110111110111011111111101111111100100100111111111001111111011001111011111011110111111111010111111…	TCGA-LUAD	1.833e-06	27
CDCA5	MYBL2	0.9145	co	1	629	010000110100011001000010101010110000001100010010100010001010101101011111111110010100110100010100111011100001100001110000110000011100111010010101011000100100001000100000101001100010001019100101000100001000100010100100110000000111010100010000000011010000110001110110100118100000111101001100101110000101100101100011000000110110100100000100000100001100110110101110100101801101011001000010011100000001011…	GTEx_normal	0.000985	27
MUC8	IL36A	0.7857	co	1	48	999999919999999999999999999999999999999999999999999999990999999999999999999999999999999999999999999999999999999999999999999999999999999999999999999999999999990999999999999999999999991999999999999999999999990909999999999919999999999999999999999999999999999999999999999999999999999999999999999999909119999999999999999999999999999919991999999999999999999999999999999999919999999999919999999999999999999…	TCGA-LUSC	3.211e-05	27
TFDP1	PRX	0.7843	co	1	113	100000000000000010001800800000000000001000000000000000000000000000000000000000000000000000001000000000000000000000000100000000000000000000001070700000000000000170000000000010000000000009000000000000700000000000009001001100000000000000000000000000000000000000000000000000000000000010000000000000010000000001000000000000000000000000000000000000000000000000000000000000000000000100000000000000100001000…	TCGA-LUSC	1.012e-06	27
MAGEA2B	CYP3A4	-0.7905	co	1	36	099990999999199999990990999199199999199999991999999099999998999919199999999999999999999999999999999999909999990090999999999909999999999999999999999099979999999909099999999999999919909919999999999799990999999999999999909990999999999999099999099099999999999999099099999099999999999999979909999990999099999999909999999999900999909919990999999990999990999999999990999999999999099009999919999990099999999…	TCGA-LUSC	0.0005608	27
TMEM163	VEPH1	0.7541	co	1	268	000000000000000000000000001000000000000000000000000000000000100001000000000110000100000080000100000000000000000000000100000000000000000010010000000000000000000000000100000000000000000009010000000000000000000000000000000000000000000000000000000000000000000000000100000000000001000000000000900000000100000000000000000000000000000000000000000000000000000000000000000000000000000000000000001000000000000…	TCGA-NORMAL	5.941e-05	27
CCNB2	CDC20	0.9136	co	1	615	000010110000011001000110101010010000001100010010100010001010101101011001011110010100100100018100111010100001010000110000110000011100111010010101011000100100001000100000100001100000001009000000000100001001100100100100010000000101010100010000000011110000110011110110100110100001100101000100101010010101100100000011000000110110101100000101000100001100010110101110100101001101011001010010011100001000011…	GTEx_normal	0.000985	28
SHE	CDH5	0.7876	co	1	655	101101111010000100100000000001000110110000111000010100010001110010110000011010110001001010000100100000111101000101001100110110000011000000000000000111011010110010000010011110111010110109011110001101110100001011011011001001111000001011000010111100001101001000010011000000000010000101010010011101100000101000011100111110001000111101111001111010000101001001000000111000110000100111101800000011100111100…	TCGA-LUSC	0.0005608	28
PIP5K1B	ESYT3	0.7524	co	1	317	000000000000000000000000000010000000000000080000000010000000001000000001000100000000000000000000000000000000000000010000000000010000000000000000000000000000000000100001000000000000000009000008000000001001000000000000000000000000000000000000900000000000100000000000000000000000100000000100000010000000000000000080000000000000000000000000000100000000000000000000000000000000000000000000010000000000000…	TCGA-NORMAL	5.941e-05	28
MCM10	S100A16	-0.7593	co	1	279	111100000101911010000001100101100111001101010101011700110001000100000110100000011010011000107110100111000700110001000011001001010001101000007011100000110110100101001011001010191110010010100101101100000001001100101001000100110010000090101001001000111010000001000011010001111100001100100011900001001000000001100010110011011100101011000000010000110010000000001001101010110010100101001010010171000101010…	TCGA-LUAD	0.000229	28
SFTA3	SLC46A2	0.7814	co	1	385	101101001000100100000000000000000000100000111000000100000000000000110000000000100001000070100000000000019100001100000090000000000000000000000000100000001000010010000000000010010000010009001010000000900000000000001001009000010000001019000071709000000001001010000000000000000000000001000000901000009000000000000700000000001000000009100001100000000001007000000000109000109000000900010110000000000000100…	TCGA-LUSC	3.211e-05	29
CDCA5	CDCA8	0.9131	co	1	632	010000110100011001000010101011110001001100010010100010001010101101011011111110010100110100010100111011100001010001110000110001011100110010010101011000100100001000100000101001100010001019100101000100001001100010100100010010000101010100010000000011110000110001110110100110100000100101000100801110000101100101100011000000110110100100000100000100001100110110101110100101001101011001010010011000001001011…	GTEx_normal	0.000985	29
PTTG1	DUOX1	-0.7578	co	1	298	100110001000001001000101100000001100000101001110111000101000000010010110101000000101100000107001100100100001110110101070111100000017001110111011011100100100001110118010000071000001000009101010100010100100010010100011011011100000110001010011011001001101011001100010010100111001001101111001811001711100001000101701011110110001011110100101000001010000011001000101101000001111100111111100700011010101110…	TCGA-LUAD	5.334e-05	29
POU3F2	MRGPRE	0.756	co	1	31	999999999990999999999909999099999999999909999999909999999919999999999999999999909999899999999990999999099999909999099999999999991909999999999919099999999990990990990999099999991199999999199999990909999999009999099999909909999990999999099999999999919999999909199991909999099099990199090999999999909909999099999999999999199997999999999900999999190909909999999999999999979999099999909999999991999999999…	TCGA-LUAD	1.071e-05	29
CGNL1	COL4A4	0.7521	co	1	314	000000000100000001000000000000000000000000000000000010000000000001000001000000000000000000000000001000000000000000000000000000000000000000000000000000000000000000000000000000000000000009000000000000000001000000000000000000000000000000000000000000000000000000000000000000000000000000000100000000000100000000000000000000000100000000000000000000000000010000000100000000000000001000000000000000000000000…	TCGA-NORMAL	0.0003529	29
TTC39A	VEPH1	0.7499	co	1	238	000000000000000000000000000000000000000000000000000000000000100000000000000100000100000000010000000000000000000000000100000000000000000000000000000000000000000000000100000000000000000009000000000000000000000000000000000000000000000000000000000000000000000000000100000000000000008000000000900000000100000000000000000000000000000000000000000000000000000000000000000000000000000000000000001000000000000…	TCGA-NORMAL	5.941e-05	30
AC117834.1	STATH	0.7674	co	1	33	999999999999999999990999999999999999999999999999999999999999999999999999999999999999999999999999999999999999999999999999909999999990999999990999999999999999999999999999999999999999999999999919999999999999999999999999999999999099999999909999999999999999099999999999099999999999099999999999999999999999999999999999999990999999999999999999099999999999990999999099999999999999990099999999999990999099999…	TCGA-LUSC	5.094e-12	30
SCIN	LRRK2	0.7504	co	1	332	000000000000001000000000001000000001000000000000000010000100000000001000000100000000000100010000001010000000000000000700000000000000001000000000010000000010000000000001000000000000100009000000000000000010000000000000000000000000000100000000000010000000100000000000000000000000100000000000000010000000000000000000000000000000000000000000000010000010000010000000000010000001000000000000000000000000000…	TCGA-NORMAL	0.0003529	30
DLGAP5	NCAPG	0.913	co	1	619	000000110000011001000110101110010000000100010018100010101010101101011111011110000100101100810100111010100001100000110081110000011100110010010100011000100100001000100100100001001001001019100001000100001001100110100100010000100101010100010000010011110000110010110110100111100001100101000110901010000101100100000011000000110010100100000100000100001100110110101110000101001001011801010010011010001000011…	GTEx_normal	0.000985	30
ECSCR	SEMA6A	0.7528	co	2	433	011111110111011010111111011010111111111111001110108001101111011111111100111011111110111101011111111101080100110110101801111110111111011801100110101110011111101111100110101101101111110109111111101111010100010101010110108111101110111110011101810001010101010111110111110011181111111101101011011101011011001100111010101111111010100110001111101101110101101100110111101000111011011111011000011101111110011…	TCGA-LUAD	1.833e-06	30
SPDYC	CBLN2	-0.7724	co	1	71	099909090999999999909999999990999999909900999990919990999999999009999990999099999999999909999999999999001099990099999999999999991909990999999909999999999999999999909999999090999999999999999999999999999919990909991999999999199099099909999999909999999909999999999990999009999999990999999990090999997999999999999909999900999990909991909019999999999099990999999999099999999999999999991999999090999999999…	TCGA-LUSC	1.012e-06	31
KIF11	MELK	0.9127	co	1	612	000000110000011001000010101010110000000000010010100010001010101101011111011110010100101100010100111011100001100001110000110000011100110010010100011000100100001000100800101001001000001009100100000100001000100010000100010000000101810100010000000011110000110000110110100110100000100101000100801010000101100100000011000000110010000100000100000100001100010110100110100101001001011001010010011000001000011…	GTEx_normal	0.000985	31
SPTBN1	NMNAT3	-0.7496	co	1	59	100010000000000010001000000000000000800000000000000000000001100000000010000000000000000000007011000000000000000000001070001000000000000000001000000000000000000010010000000080010000000109000000000001000000000000000000000000001000000000000001000000000000000000001000001000010011000100000000800000700100011000001000000000000000000100000000000000000000000001000000000000000071000000010000000000000000000…	TCGA-LUAD	1.833e-06	31
PIP5K1B	EPCAM	0.7496	co	1	322	000000000000000000000000000000000000000000080000000010000000000000000000000100000000000000000000000000000000000000010000000000010000000000000000000000000000000000000001000000000000000009000008000000000000000000000000000000000000800000000000900000000000007000000000000000000000000000000000000010009000000000000000000000000000000000000000000000000000000000000000000100000000000000000000000000000000000…	TCGA-NORMAL	0.0003529	31
CDCA5	UBE2C	0.9127	co	1	620	010000110100011001000010181110110001001000010010100010001010101101011111111110000100110100010100111111100001100001110000110080011100111010010101011000100100001080100000101001100110001019100100000100001000100010100100110000000101810100010000000011010000110001110110101110100000110101000100101110000101100101000011000000110110100100000100000100001100010100101110100101001001811001000010011100008001011…	GTEx_normal	0.000985	31
C2	VEPH1	0.7445	co	1	282	000000000000000000000000000000000000000000000000000010000000000000000000000100000000010000700000000000000000000000000000000000000000000000000000000000000000000000000001000000000000000019000000000000700000000000000100000000000001000000000000000010000000000000000100000000000000100000007000900000000000000000000000000000000010000000000000000000000000000010000000000001000000000000000000001000000000008…	TCGA-NORMAL	5.941e-05	31
LIMS2	FZD4	0.7541	co	1	61	000000000000000100000000000000000000101000100000010000000100000000000000000001000001000000100000000000000000000000000010000000000000000010101001000000000000100000000000000000000000000009000010000000100010000000000000000000000010010001000110000000000000000000000000000000000010000000000010100000000000000001000001000000010000000000000000000010000000001000010000100000000000000000100000000000000001000…	TCGA-LUAD	5.334e-05	31
ACTL6A	SENP5	0.7796	co	1	609	101001000000100110101010000000000001110011000100010000010001000010100000000001000011000011111000000000001010001110000110001111000011000000101011100110001010110110010101080110010101110019001010100011110100011001001000001001110010101001100000101000101110001110001001000000001111001010010001711001011010011001111000010110010001010011010000110010100000000001001001101010110100000010010100000000110111100…	TCGA-LUSC	0.0001439	32
LRRK2	RAP1GAP	0.7435	co	1	319	000000000000001000000000000000000000000000000000000010000000000001000000000100000000000100000000000000000000000000000070000700000000000000000001010000000000000000800011000000000000000009000000000000000010000000000000100000000000000100000000010010100000000000010000000000000000000000000000900010000100000000000000000000000000000000000000000000000010007010000000000010000001000700000000081000001000000…	TCGA-NORMAL	0.0003529	32
TPX2	FOXM1	0.9117	co	1	616	010010110100011001000110101011110001000100010010100010001010101101011011011110000100110100010100111010100001000000110080110000011100111010010101011000100100001000100010101001101000001009100100000100001001100010100100110000000101010100010000000011110000110010111100100111100001111101000100801010000101110101000011000000110110100100000100000100001100110110101110100101001101011001000010011100001001011…	GTEx_normal	0.000985	32
ASPM	KIF11	0.9117	co	1	611	000000110000011001000010001111010000000100010010101010101010101101011001011110000100100100010100111010100001100011110000110000001100110010010100011000100100001000100100100001001000001009100000000100001001100010100100010000000101010100010000000011110000110010110100100111100001100101000100801010000101110100000011000000110010001100000100000100001100110110101110000101001001011001010010011000001000011…	GTEx_normal	0.000985	32
RP1-32I10.10	KCNK16	-0.7421	co	1	39	999999999099999999999999999919999999999099999991199999999999999099999919999999999979999199999991990999999999999999999999999990199091919909999999999999109999999999090999999999999099991199999999999999999999099990999999999199999999999999991999999900999919999099999990191999999999199991991199999999191979999999999999999991999999999999999979999999999999999999919010999999991999999999999999999091999999999…	TCGA-LUAD	1.833e-06	32
TUBA3E	LCE1F	-0.7643	co	1	44	999999999999999999999999999999999999999999999999999999999999999999999999999999999999999999999999999999999999997999999999999999999999999999999999999999999999999999999999999999999999999999999999999999999999999999999999999999999999999999999999999999999999999999999999999999999999999999999999999999999999999999999999999999999999999999999999999999999999999999999999999999999999999999999999999990999999999…	TCGA-LUSC	1.436e-09	33
DACH2	GABRA5	-0.7697	co	1	50	999999999999999999999999999999999099999999999999999999999999909999999999999999909999999999099999009999999999999999999999909999999999999999999999999999999999999991999999999999999999999999999999999999999999999999999999909999999999999099099999990999999999999999099999999999099999099090999999999999799909999099999999999999999999999991999999999990990999999999999999099999999999999999999999999999999999999…	TCGA-LUSC	6.175e-06	33
SYNPO2	TNS1	0.7626	co	1	60	000000000000000000000000000000000000000000000000000000000000000000000000000000000000000000000000000000000000000000000000000000080000000000000000000000000000000000000000000000000000000009000000800000000000000000000000000000000000000000000000000000000000000000000000000000000000000000000000000000000000000000000000000000000000000000000000000000000000000000000000000000000000000000000000000000000000000…	TCGA-LUSC	5.094e-12	33
TPX2	ANLN	0.91	co	1	582	000000110000011001000010101010110000000100010080100010001010101101011011011110010800100100010100111010100001000000010080010000011100110010010108011000100100081000100000100001080000001009100000000100001000100010100100010000000101010100010000000011110000180010810100100110100000100101080100801010000101100100000011000000010110000100000100000100001100110110108110100101001001011001000810011000001000001…	GTEx_normal	0.0002592	33
SYT15	LIPH	0.7429	co	1	335	000000000000000000000000000000000000000000000000000010000000101000000000000100000000000000000000000000110000000000010000000000000007000000000000000000000000000700000001000000000000000707000000800000000011000000000000000000000000000000000000007010000000100000000100000000000000000000000100100010000000000000000000000070000000000100000000000000000000000000000000000000000000000000000000000000001000000…	TCGA-NORMAL	0.0003529	33
LIMS2	HES1	-0.7389	co	1	91	100000000000000100000000000000000010107000000000100100000000000000000000000000010001000070000000010000010100000000000010010000070000010170801101001100000700000000100000000100010000000009000100110000000100000000000000100000000080000001000000000000000010000000010100000000000000101000007011000001000100000008001701001000010000000100010000000100000000001000800010100000000000110000000000000000000111000…	TCGA-LUAD	1.833e-06	33
BIRC5	CCNB2	0.9106	co	1	615	010010110100011001000110100010010001001100010010100010001010101101011011011110000100100100018100111110100001000000110000110000011100111010010101011000100100001000100100100001100000001019100100000100001000100100100100110000100101010100010000000011110000110011110110100110100001100101000100801010000101100100000011000000110110110000000100000100001100110110101110100101001101011001010010011100001000011…	GTEx_normal	0.000985	33
SQSTM1	MYZAP	0.7795	co	1	160	000007007000000100000000000000000100010000000000000000000000000071000000000000001110100000000000010000070100000000000000000000000000001000008000010100000000000000001000000000100000000009000000107000000000011000000101000000101000000000000000700000000110090000000101000000000000000000000001700001000000000000001000000000100001001001010000000000011090009000000000001000900000100001700000000010000001000…	TCGA-LUSC	0.0005608	34
PLD5	NPIPB15	-0.7367	co	1	35	000900000000080990099000010000000000009000900900009000000000090019000100090000000009091909000000000000090000090090009090000000000000000080900000000090900000000900000000990000000100000019110009009000900900001090000009009010009090900000000001909900000000000010000000099000010000000000090090710009900000100100009000009990000900000000000001001000001009009000000000019000011000909009099900000790001010000…	TCGA-LUAD	1.833e-06	34
C2	ABCA3	0.7416	co	1	320	000000100000000000000000000000000000000000000000000010000000000100001000100100000000000000700000001000000000000000010000000000000000000000000000000000010000000000000001101000000000000009000000000000701011000000000000100000000100000000000000000010000010100000000000000000000000100000007100900010000000000000000000000000000100000000000000000000000000000010000000000010000000001000000000001000000000008…	TCGA-NORMAL	0.0003529	34
PCMTD1	FXYD1	0.7443	co	1	53	000000000000100110000000000000000000101000000000000000000000000000000000000001000001000000800000000000010100000000000710000000000000000080007001000100000100000000000000010100000000000009000000000000100000000000000000000000000000000000000010000000001000000000000010000000000000000000011000100000001000000007000000000000070000000010000000000000000810000000000000700000000000000000001000000000000009000…	TCGA-LUAD	0.0008554	34
BEST2	INSRR	-0.7687	co	1	38	999990999999999999999999999999999909999999999999999999999999999999999999999999999999999999099999999999999999990999999999999999999991999999999909799999999999999999999999999999999999999999999999999999999999999999091999999999999999999999999999991999999999999999999999999999999999999999999999199999999999999999909199999999999990909999999999999999999999990999999999999999999999999909991999999999999999999…	TCGA-LUSC	6.175e-06	34
KIFC1	UBE2C	0.9097	co	1	529	000000110100011001000010181800110000000000010010100010001010101101011101011110000100100100010100111010100001100000010000000080001100110010010101011000100100001000100000100008100000001009000100000100001000100000100100110000000101810100010000000011000000110000110110100110100000100101000100801010000801100108000001000000110000100100000100000180001100010100101110100101001001811000000010011000001000011…	GTEx_normal	0.000985	34
C1orf87	CXorf30	0.9094	co	1	455	901999909190911909199099190911199990919990099919999909909000919901911001919010090099110099909009901099999801910091199991919999901199909091990090990911099911990999999191901999009099909909019009900099910990090119919999990999110191999009010000999090910909099090019000909910191090911011009909901910999011190199109909100099019911080090990110199109199199119119011099010191900009001909990109911900000900999…	GTEx_normal	0.000985	35
CACNA2D2	RNF128	0.7402	co	1	319	000000010000000000000000000000000000000000000000000010000000000000001000000100000100000000000000001001000000000000010000000000010100010000000000000000000000000000100001000000000000000009000000000000000000000000000000100000000001000000000000000010000000100000000000001000000000100000000100700000000000100000000000000000000000000000000000000000000000000000001000000000000000001000000000001000000000000…	TCGA-NORMAL	0.0003529	35
RFC4	ZNF639	0.7725	co	1	702	101001101010100110111000000101000011110011101101011101010101000010100000000001101011011011101000000000011110001110000111001111100011001000101011100110001011010111010001000110110100110119001010100001110100811100001001001001111010101011100011101100001111001110001001010007001110001110110011100001111110011001011100110110001001010011111010111011000011001001001001111010110010100110110100000710110111100…	TCGA-LUSC	0.0005608	35
CLIC1	FXYD1	0.7396	co	1	68	000000000000100000000000000000000000108001000000000001000001000000000000000000000007000010100000000000081000001000000010000000000010000000000001000110000000000000010000010000010000000009000000090000100000000000001001007010011000100000000000000000000000001100000010000000000000000000011000711009000000010007001000000000000000000000010000001000000010000000000000110000000000000000000000000000000009000…	TCGA-LUAD	0.000229	35
ITGA2	CDH5	0.7323	co	1	198	100001100000001010000010101011010010000010100000110100100000001000000010101001000110101000108011010001070101100008000000010000170101010000010010100000010000100000100000100010000001011119000100100000001000100000001001010100100000000001011000011100001000000001000010101100100000100010000000000010001000101000010001010111000010000100000010110100001000000000011101811001101100101110111800101011000010101…	TCGA-LUAD	1.071e-05	36
NCAPG	KIF11	0.9092	co	1	640	000000110000011001000110101110110000000100010018101010101010101101011011011110000100111100010100111010100001100011110081110000011100110010010100011000100100001000100100101001101000001019100101000100001001100110100100010000100101010100010000000011110000110010110100100110100001100101000110901010000101110100000011000000110010001100000100000100001100110110101110100101001001011001010010011010001000011…	GTEx_normal	0.000985	36
CRB3	PIP5K1B	0.7397	co	1	258	000000000000000000000000000000000000000000010000000000001000000000000000000100000000000000700000000000000000000000000000000000010000000000000000000000000000070000100000000000000010000009000008000000000000000000000000000000000000000000000000900000000000107000000010000000000000000000000000900010000000000000000000000000000000000000000000100070000100000000000000000000000000000000000000000000000000000…	TCGA-NORMAL	0.0003529	36
DLC1	GPR116	0.7689	co	2	658	101101001010100110111001010001000011110000101000010100010001000000110110000001110011000011101011000000011100001100001080101010000011000001001010100111001100010110010000010111110011010009001010100100110100000100001011001100011000101011010010101100001111000100001001001000100010000101100011011001101010110000011101101011001000011001111000011001000001001000000001011000111000000110111011100001100000100…	TCGA-LUSC	0.0001439	36
TPX2	KIF2C	0.9091	co	1	592	000000110100011001000110101010010000000100010010100010001010101101011001011110010100100100010100111010100001000000010080110000011100110010010101011000100100001000100000100001100010001009000100000100001000100010100100010000000101010100010000000011100000110000110100100110100000100101000100101010000101100100000011000000010110000100000100000100001100010110101110100101001001011001000010011000001000011…	GTEx_normal	0.0002592	36
GRHL3	GSTM1	0.7674	co	1	218	000000091000100000100000100000009900810090001000000000000101000000000901009900000001000910000001100000000019190000001100109000010000010900090001000900900100000000000000000000011001009009000090000019000000000000000000000000000000000000000010001000080000009010010000001000001000001110000000100000000000001008900010109001000000000001000000900010000001000100000000110090800009000100010000010090110001000…	TCGA-LUSC	0.0001439	37
CLDN18	HNF1B	0.764	co	1	478	101000000000000000000000000100000010110000100011010001000000000000010000000000100000000090900010000001019100000008009090010000000001000000000010100000001000010090000000000890010000010109000000900000000000001000001090000100100000001000000090001009000009001000000000000000009000000000009000800009108000000001011900001111001000000101010000110019000001100000800000100110100000800109101900990090100000000…	TCGA-LUSC	6.175e-06	37
GPD1L	CAT	0.7389	co	1	341	000000000000000000000000001000000000000000000000000010000000000000000000000110001000000000000000000000000000000000000000000000000000010000010100000000000000000000000001000000000000000009000000000000000001000000000000001000000000000000000000000010000000000000000000000001000000000000000100700000000000000000000000000000000000000000000000000000000000000010000000000000000000000000000000000000000000000…	TCGA-NORMAL	0.0003529	37
AURKB	CDCA5	0.9091	co	1	632	010000111100011001000010101011110001001100010010100010001010101101011011111110000100110100010100111110100001010001110000110000011100110010010101011000100100001000100000111001100110001019100101000100001000110010100100110010010101010100010000000011110000110001110110100110100000100101800100801110000101100101100011000000010110101100000100000100001110010110101110100101001101011001010010011100010001011…	GTEx_normal	0.000985	37
CEP55	CDCA5	0.9091	co	1	632	010000111100011001000010101011110001001100010010100010001010101101011111111110000100110100010100111011100001110001110000110000011100111010010101011000100100001000100000101001101110001019100101000100001001110110100100010000000101010100010000000011110000110001110110100110100000100101000100901010000101100101000011000000110110101100000100000100001100110110101110100101001101011001000010011100010001011…	GTEx_normal	0.000985	37
ECSCR	NRN1	0.7367	co	2	601	111111111110101111111101111111110101101101011110100101111111111111111111111011111101101101011100111011111111011010101011101101111100111101011101001111101110011111110111111110111011111119011111111111011000101101010110111011011111011111111111101100111111010101011101111111111111111111111011011111110110111111111110111110110110111100111010101110010000111101111111111001011110111011101111011111111111111…	TCGA-LUAD	0.0008554	37
LAMP3	SNX25	0.7374	co	1	288	000000000000000000000000008000000000000000000000000010000000000008000000000100000000000100080000000000000000000000000000000000000000000000008000000000000000000000000001000000000000001009000000700000000000000000000800000000000000000000000000000000000000100000010100000000000000000000000100900000000000000000000000000000000000000000000000000000080000000010000000000000000000000000070000000000000000000…	TCGA-NORMAL	0.0003529	38
EMX2	GPR50	-0.7553	co	1	40	999999999999999999999999999999999999999999999991999999099999999999999999999999999999999999099999999099999999999999999999990999999999999999999999999999999999999999999999999999999999999999999999999999999999999999999999999999999999999999999999997999999999999999999999999999999999999909999999999999999999999999999999999990999999999990999999999999999999999999999999999999999999999999990999999999999999999…	TCGA-LUSC	1.436e-09	38
ASPM	PDE3A	0.7357	co	1	345	111010100110010170771010100001000110010100010107001000100111000100000111000101071110110101101110070117001008110011100001171000110701110010708001010000111100111710000011101000001107000119100111100011001011100000110100011711000100010011011071011101110117010110110170000101700011100100000010701100117101110011000111010071110110111100110001000001101107107011111001100000000101100111111111110111001001110…	TCGA-LUAD	0.0008554	38
BIRC5	CEP55	0.9083	co	1	632	010000111100111001000110108010010001000010010010100010001010101101011011111110000100110100010100111011100001110000010000110000011100111010010101011000100100001000100101100001101000001019100100000100001001100110100100110010100101010100010001000011110000110010110110100110100001100101000100901010000101100100000011000000110110110100000100000100001100110110101110100101001001011001000010011100011000011…	GTEx_normal	0.000985	38
NDUFA4L2	HIGD1B	0.731	co	1	476	111111011110111111101101111101111111108111111010101101010111111111101111111110111111011111100100111001181101111011100080111001101110011101100100011110001011110011111011111111111011111019111111101111111110111011010111101110101180111111010101100100101101011111111811110018001111111101111110911110001111111108111111001100001010100110111100101110011110011110110011811110110001011011100011011110011111111…	TCGA-LUAD	1.071e-05	38
WDR76	MKI67	-0.7645	co	1	53	000000000000000000000000000000000000000000000000000000000000000000000000100000000000000000000000000000000000000001000000000000000000000000000000000000000000000000000000000010000000000009000001000000000000000000000000000000000000000000100000001000000000000000001000000000000000000000000000700000000000000000000000000000000000000000000000000000000000000000000000000000000100000000000000000000000000000…	TCGA-LUSC	0.0005608	39
CD93	GPR116	0.7592	co	1	576	100001001010000110111000000000000001000000101000010100000001000000010010000000110000000011008000000000011100001100000010001010000001000001101010100110000008010110010000010010010000010109001010100000110100000000001011001000010000101011000010101000001111000000000000001000100010000101000010010001000000100000000101100011001000010001111000011001000001001000000000011000100000000110110001000011100000100…	TCGA-LUSC	6.175e-06	39
KANK3	KIF7	0.7297	co	1	329	811110110010001001100001110111000101009101101100011001000101101111001111101110111010001101008111111000100111100000000801011000101000110100181110011001010000180001110011101000011011811019001110111101000010100011001000111110011110011001011110000100110100100101011010101111001010110011011011710110100101110018101110011001000100000000100110001180011100110100010110011011000000110010000000111101000111001…	TCGA-LUAD	1.071e-05	39
CCNB2	KIF11	0.9082	co	1	628	000000110000011001000110101111010001000110010010100010101010101101011011011110010100101100018100111010100001110010110000110000011100110010010100011000100100001000100100100001101100001009100000000100001001100110100100010000100101010100010000000011110000110011110100100110100001100101000100801010000101110100000011010000110110001100000101000100001100110110101110100101001001011001010010011000001000011…	GTEx_normal	0.000985	39
TEX101	MAGEA2	0.7604	co	1	99	099999999999199909991999999999999919999999090991999999999990999999999999999990999999999999999999999999990999999091999999999999999990999999999919099999901099999099999999990999909999999999999909999999999999999999991990999990999999999999099991990099990999991999999999909099999999999999999919999990199999999909999999999901997999999999999999909999999999999999999991991999090999199709919999999900199999099…	TCGA-LUSC	3.211e-05	39
FMO2	MFSD2A	-0.7369	co	1	224	000000000000000001000000000000000000000000000000000000000000000000000000000000000000000800700000000000000000000000010070000000000000000000000000000000800000000000008000000080000000000009000000080000000001000000000000000000000000000000000000900010000000000000080800000000000000000000007100900000001000000000000000000000000000000000000000000000000000000010000000000100000000000000000000700080000000000…	TCGA-NORMAL	0.0003529	39
DUOX1	PARM1	0.735	co	1	294	000000000000000000000000000000000000000000000000000000000000001001000000000110000000000000007000000000000000000000010070000000000007000000008000000000000000000080000000001070000000001009000000000000801000000000000000000000000000000000000000000010000000100000000000000000000000100000000100000000700000000100000700000000000000000000000000000110000000000110001000000000000000800800000000700000000000001…	TCGA-NORMAL	0.0003529	40
UBE2C	TROAP	0.9069	co	1	628	010000110100011001000010181110110001001800010010100010001010101101011111111110010100110100010100111010100001100001010000110080001100111010010101011000101100001080100100101001100101001009100100000100001010100010100100110010000101810100010000000011010000110000110110108111100001110101100100101110000101100101000011000000110000100100000101000100001100010100101110100101001801111001000000011100001000011…	GTEx_normal	0.000985	40
THBD	CD93	0.7316	co	1	625	111011110111010811111111011001101111001111111101111100011111111010111110111011101111111110118011110101111110110111101111111111101011111111101111111011010111101111111110110101101111111119111011101111111100111111111111011111111111100111111101011101111110010111111111011011111111001111111011011011111111111111111111111111111111111111011111111001111111111000110111111001111110011111111011011111100111111…	TCGA-LUAD	0.0008554	40
EN1	KCNB2	0.7591	co	1	123	999999999999999990999991999999999999999999999999999999919999999999999999999999999999999999999999999999999999199199999199199999099909999999990999999999999999999999999999999999999999999999999990999909999999999999999999999999999991999999099999999999999099990999999990999999999999999999999999199999900909999999999999999900999999999091999991999990999999999999999099999999999999099009999999999999099999999…	TCGA-LUSC	6.175e-06	40
SDR42E1	CDC45	-0.7286	co	1	290	001777101111110010710701111001101101001111100100000101110110010000000070100001110010011001100811800000077018010100101001100010010101101101001010000000107110117071000101111170101101110109111111001111000011171117110010110081011010701007000100000700010117107011011071011001010100111100171010811101011111710001111700111100101100110010111010000010100017100001101000117011777000000000710011710100001111710…	TCGA-LUAD	1.071e-05	40
ANGPTL7	USH1G	0.7283	co	1	71	919909919999999990999099991091999911909990990999990999119919919999999999999099999999919999999999999999999919909919009991999999991999999909991919900999999909999991999909999999190999999119999999999909999999199999999999199999999990999199199999990191999199901919999999909999999999990999999999999999919101909991199999919099990999999999991091991919009999919099909099999099999190999999991999999991090999919…	TCGA-LUAD	1.071e-05	41
KIAA1324L	TMEM87A	0.7343	co	1	247	000000000000000070070000000000080000000000000000000000008000800008008080000100000000000000080000008000000008800000000000700000000000000000000807700000000700000070000001000000000000000709000000080000700000000000007087800000000000700000000000007000010000000000000000010000000000000000000000700000000000000000000000000080000000000000700000000000000000008000100000000000000000080000000000007070000008000…	TCGA-NORMAL	0.0003529	41
MYCT1	GPR116	0.757	co	1	558	100101001000100110111000000008000001000000101000010100000001000000000010001000110001000081000000000000081100001100001010000010000011000001108010100110001000010010010000010010010001000109001010100000110100000000001011001000010000101011000010101000001111000000000800001000100010000000000010010001000000100000000108100011001000010001111000011000000001001000000000011000100000000100110001000010100000100…	TCGA-LUSC	6.175e-06	41
PIP5K1B	KIAA1324L	0.7332	co	1	295	000000000000000000070000000000000000800000010000000000000000000000000080000100000000000000000000000000000008000000010000700000000000000800000000800000000700000070000001000000000000000009000008000000700000000000000087000000000000700000000080900000000000100000000000000000000000000000000000700000000000000000000000000000000000000000700000000000000000008010000000000000000000000000000008000070000000000…	TCGA-NORMAL	5.941e-05	41
XAGE2	XAGE2B	0.7343	co	2	71	090900999009090099919909000909109909909017099900091919909099070009999001090009000099900979990009009090009990090000099919919009010109999900909090090999000099999990190909099990090991010199901999999000990007090000909999909909090009909990000000010900099978190199091900909009899099901990990900999009009090900909999999099990990900099099090010009109090090099000900009909000001009909999990901009990000909909…	TCGA-NORMAL	0.0003529	41
TPX2	CDCA8	0.9062	co	1	591	010000110100011001000110101010010000000100010010100010001010101101011011011110010100100100010100111010100001000000010080110000011100110010010181011000100100001000100000100001000000001009000100000100001000100010100100010000000101010100010000000011110000110010110110100110100000100101000100001010000101100101000011000000110100100100000100000100001100010110101110100101001001011001000010011000001001011…	GTEx_normal	0.000985	41
TUBA3E	AP000679.2	-0.7575	co	1	30	999999099999999999999999999999999999999991999999999999999999999999999999999999999999999919999999999999999999991999999999999919999999999999999999999999999999999999999999999999999999999909999909999999099999999999999999999999999999999900999919999099999999999999999999999999999999909999999999999999999999999999999999999999999999099999999999999999999999999999999999999999999999999999909999999999099999999…	TCGA-LUSC	6.818e-05	42
LRRK2	SEZ6L2	0.7315	co	1	341	000000000000000000000000000000000001000000000000000010000000001001000000000100000000000000010000000000000000000000000000000000070000001000000000010000000000000000000011000000000000000009000000000000700000000000000000000000000000000000000000000010000000000000070000000000000000100000000000700010000000000001000000000000000000000000000000000010000000000010000010000100000000000000000000001000000000000…	TCGA-NORMAL	0.0003529	42
AURKB	CDC20	0.9059	co	1	637	000010111110011001000110101010110000001100010010100010001010101101011101111110000100100100010100111010100001010000010000110000011100111010010101011000100000001000100001111001000000001010100110000100001001100100100100110010010101010100010000010011110000110011110110100111100001101101100100001110010101100101000011000000010000111100000101000110001110010110101110100101001101011001010000011100001000011…	GTEx_normal	0.000985	42
ASPM	TPX2	0.9043	co	1	586	000000110100011001000010001010010000000100010010100010001010101101011001011110000100100100010100111010100001000000010080110000011100110010010101011000100100001000100000101001000000001009100000000100001000100010100100010000000101010100010000000011010000110010110100100110100000100101000100101010000101100100000011000000110110100100000100000100001100010110101110800101001001011001010010011000001000011…	GTEx_normal	0.0002592	42
CEP55	GYLTL1B	-0.7277	co	1	275	100100101011111000000110100111110001101000011000100000010010001100110100001100100101110000100100110011110000110001001000110000011110101000000001011111101100000010100001111100111110001019001010000100001110100110100010011010110010111000010010100000010000110000010100100100100000111101100000910100010111010101000110101000111110111100111001100110000000100010101000100001001000010001100110010000001000011…	TCGA-LUAD	1.071e-05	42
ITGA1	S1PR1	0.7253	co	1	82	100000000111100000010000000000001000101000001000100000001000000000110101000000000101000000100000001110000000000101000100101000000000100000101007000010100110011000001000000001000000000009000000010000000000000000000000001000000010000000000000000000000000000000100000000001000000010000100000000000000000000011000000000000110000001000000001001000000011000000000000100000000000000000000000000000000001000…	TCGA-LUAD	3.122e-08	42
KIAA1324L	MCCC2	0.7251	co	1	233	000000000070000000070000000000000000800000000000000000000000000000000080000100070000000000000000000000000008000700000000700000000000000000000700800000000700000070000001000000000000000009000700000000700000000000000087000000000000700070000000000000000000000000000000000000000000000000000000700000000000000070000000000000000000007000700000000000000000008000000000000000000000000000000008000070000000000…	TCGA-NORMAL	5.941e-05	43
KIF23	SLC16A14	0.724	co	1	70	000000100000001070010000000010000000000000000008100000001100001000000710007007000010000080008010110101000101000000000000011000110100010000000100000000010700700700100000000000000007010009001101100000000000000000000000000100000000000000011000000000100000100000000010001100100010100000000010000700000000000110000000000000000008000000000000000101000000000000010010000000000000010000000001000070000000100…	TCGA-LUAD	2.965e-09	43
C2	PIP5K1B	0.7311	co	1	296	000000000000000000000000000010000000000000000000000010000000000000000000000100000000000010700000000001000000000000000000000000000000000000000000000000000000000000100001001000000000000009000008000000701001000000000000000000000000000000000000900000000000100100000000000000000000000000007000900010000000000000000000000000000000010000000000100100000100000010000000000001000000010000000000010000000000008…	TCGA-NORMAL	0.0003529	43
RCAN1	STARD8	0.7508	co	1	128	000000000000000100000000000000000000000000000000000000000010000000000000000000000100000000011000000000000000000000000000000000000000000000000000000000000001000000000000000001000000000009000000000000100000000000000000001000000000000000000000010000000000000000000000000000000000000001008000700001000000000000000000000000000000000000000000000000000000000100001000000000000000000000000000000100000000000…	TCGA-LUSC	1.579e-08	43
NUSAP1	CEP55	0.9043	co	1	624	010000110000011001000110001010010001000000010010100010001010101101011111111110010100110100010110111010100001110000010000110000011100110010010101011000100100001000100100100001101100001009100100000100001001100110100100010000000101010100010001000011010000110010110100100110100001100101000100901010000101110100000011000000110110001100000111000100001100110110101110000101001001011001080010011100011000011…	GTEx_normal	0.000985	43
DNAH2	EFCAB1	0.9041	co	1	233	900000000000000000100000000001000000009000000000000800000000000091011008010010000000000000000000000000000000001000000091009000001100000000000000000001000001000000009000081090000008000009000000900000000000000009000900000000000000000009010000000080000000000090000000000080000000000010009000900010900000100000010900000000019010000000080000000000100109100110000000000100900000800009900009000090000000890…	GTEx_normal	0.0002592	43
S100A16	CDC25C	-0.7271	co	1	305	101010100000911010000110101100000111001101010011110700100010000000010011101100011110101000817110110011000700010000100011111000010101100110017011110000110010101100181011100010090000010019000001101100001000001010101001010100100110010190101001001001111010000011110110100000111000101100100101900001101101100001000010110011101011000101000010010110011010100010001011101010111100110100011010010171000101000…	TCGA-LUAD	0.000229	44
EDNRB	PCBP3	0.7549	co	1	50	000000000000000000000000000000000000000000000000000000001000000000000000000000000000000000000000000000000000000000000000000010000000000000807000000000000000000000000000000000000000000109000000000000800100010000007000000000000000100000000000000000000000000000007701000000000000000000001000000000100000000000000000000070000077000000001070000000000010000000170000000000000000700000010000000000000000000…	TCGA-LUSC	0.0001439	44
GIMAP8	NRN1	0.7273	co	1	561	111011111110101111111101111110110101101101011110100101111111111111111111111011111101101101010100111011111111011010101011101111111110111101001101011111101110010011111110011100111111111109011111111111011010111101110110101011011110011111111111101100111111010101011101111111111111111111111011010118110010101111111810101110111110111100111010101110010000111001111110111101011010111011101111111111110111111…	TCGA-LUAD	0.0008554	44
SAMHD1	HSPB8	-0.725	co	1	333	000000000000000000000000000000000000000000000000000010000000000000000000000100001000000000000000000000000000000000000000000000000000000000000000000000000000000000000001000000000000000009000000000000700000000000000000000000000000000000000000000010000000000000000000000000000000000000000100000000000000000000000001000000000000000000000000000000000000000010000000000100000000000000000000000000000000000…	TCGA-NORMAL	0.0003529	44
NUSAP1	TPX2	0.9032	co	1	566	000010110000011001000100001010010000000000010010100010001010101101011001011110000100100100010100111010100001000000010080010000011100010010010101011000100100001000100000100001000000001009000100000100001000100010000100010000000101010100010000000011010000110000110100100110100000100101000100801010000101100100000011000000110010000100000100000100001100010110101110800101001001011001080010011000001000011…	GTEx_normal	0.0002592	44
EFS	AOC3	0.7208	co	1	333	100111001011111000110010010001010110101000011010000101001100101100101101011100100010111000010010111100101101110100001001110000001001110101811111001011101010011010110001011001010011111019011110010101010100010001011100111110010101111011010011100010110111101001101100101110010011000001010010011111000000100000001111011100010110111000110110101100010101111001010110110001101101110011011110010110001111000…	TCGA-LUAD	1.833e-06	45
CDCA8	KIF11	0.9031	co	1	598	000000110000011001000110101010010000000100010010100010001010101101011001111110010100100100010100111010100001000000010000110000001100110010010180011000100100001000100100100001000000001009100100000000001001000010100100010000000101010100010000000011110000110010110110100110100000100101000100000010000101100101000011000000110010001100000100000100001100110110101110000101001001011001010010011000001008011…	GTEx_normal	0.000985	45
RFC4	TRA2B	0.7546	co	1	635	001001000011100110101001000100000011110011000101010101010100000010100000000001101001000011101000000000011110001100000110001111100011000000101011100110001011010111010001000110010100110110001010100000110100011101001010001001101010101001100000101000001110001110001000000800001110000010110001100001111010011001011100000010001001010011010010111010000011000001001000111000110000100100000100000000110011100…	TCGA-LUSC	0.0001439	45
PCSK9	CDKL2	0.7243	co	1	322	000000000000010001000000000000000000000000000000000000000000801000000001000100000000000000080000000000000000100000000009000000000000018000000001100000000080090000000001100000000000000009000000001000900000010000000100000000000001000000001001000000000010180000000000000001090000100010000000900000000000000000000000000000000100000000900000000000000000000100000000000000000090001000000000000090000000000…	TCGA-NORMAL	0.0003529	45
FOXQ1	EXO1	-0.7243	co	1	338	101000111101010010001110100101001011701011110001010100110011000100100011101001010110011180109011100111110100010011100091001010011001111011009070110100010100701100100001101010101111000119100101711000000011100010101001010700101100000807000000010001111010111001110111117001100001011100001001011000707000110001110010111110111101101110000010170111101011000010011007101010101111100711711010010111011110010…	TCGA-LUAD	0.000229	46
POTEG	POTEM	0.7543	co	1	98	999999999999999999999999999999999999999991999999999199919999999999999999999999999999999919999999999999999999999999999999991919999999999999999999999999999999999999999999999999999999999999999999999999999999999999991999999999999999999991999999991999999999991999999999999999999999999999999991999999999999999999999999999199999999999999919999999999999919999999999999999999199999999999991991999999199999999…	TCGA-LUSC	0.0001439	46
SDCBP	ERO1L	0.724	co	1	360	000000000000000000000000000000000000008000000000000010001000000000000000000100010008000000007000000000000000000000000000000000000080000000000000000000000000000000000000000000000000000000000000000000000000000000000000000000000000000000000000000010000000000000000000008100000000000000000100700000000000000000000001000000000000000000000000000000000000000000000000000000000000000000700000000000000000000…	TCGA-NORMAL	0.0003529	46
KIF20A	ZNF572	-0.7246	co	1	243	010010101000001000110110110101001100000100000010001000101010010000010010000100001110101100800000100010000007100000100001111000000000111180000101000000101710011070000110111000101000010019111010010110000010001100000110010011010000000010010000000001110001100101000111000001100000110000010010900100000101100000000111000000110010100010701000000000171000100011000000000000701171000711110018810000011000010…	TCGA-LUAD	0.0008554	46
TSPY2	TSPY6P	0.7513	co	1	54	999999999999999999999999999999999999999919999999999999919999999999999999999999999999999999999999999999999999999999999999999999999991999999999999999999999999999199999999999999999999999999999999999999999999999999999999999999999999999999999999999199999999999999999999999999999999999999999999999999999999999919999999999999999999999999991991999999999999999999999999999919999999999999999999999999199999999…	TCGA-LUSC	3.211e-05	46
CLIC5	VASH2	-0.7522	co	1	30	700000000000000010000000000000000000000000007001000000000000000000000000001000000000000000700000000000000000000000000070000000000000000000000000000000000000000000000000000000000007000009000000000000100000000000000700000000000000000070000000007100000000000000000000000007000000000000000000000000000000000000000800000000000007000000100000000000000000000000000000000000010000000000000000000000700000100…	TCGA-LUSC	6.818e-05	46
CEP55	CDC20	0.903	co	1	639	000000111000111001000110101010010001001000010010100010001010101101011101111110010100110100010100111010100001110000010000110000011100111010010101011000100100001000100000100001101100001009100100000100001001100110100100010010000101010100010000000011110000110011110110100110100001100101100100901010010101100100000011000000111110111100000101000100001100110110101110100101001001011001000010011100011000011…	GTEx_normal	0.000985	46
SEMA6A	CDH5	0.7199	co	2	488	111111111111010011111111011011111111111111011110118001011111111111111101111001111110111101011111111111110110110110101801111111111111011801110110801111011111101111110110101111101111110109111111101111010100111111010111111111111110111110111101810001111100010111111111110111111111111111101011011111011111011110111111111111111010100110001111111101111101111001110111001001111111111011011000011111110110011…	TCGA-LUAD	1.833e-06	46
TEK	FZD4	0.7195	co	1	74	000000000000100110000000000000000000001000100000010000000100000000000000000011000000000000000000000000011000000000000010001000000000000010100000000000000000100010000000000800000000000109001080100000100000000000000000000000000000010001000110010001000000000000000000000000000080000000000010100000000000000000000000000000000001010000100000000000000000008001010000000000010000000000110000000010100000000…	TCGA-LUAD	5.334e-05	47
SENP5	FBXO45	0.749	co	1	614	001101000000100110101000000000000000110001000101010101000001000010100000000001000001000011100000000000001110001110000110001111000011000000100010100110001000110110010101010110010101010009001010100011010100011001001000000001111010101001100010101000001011001000000001000000001111001010010001711000000000011001011000000010081001000011110000110010000010000001000000101000110000000110110100000000100118100…	TCGA-LUSC	3.211e-05	47
CCNB2	UBE2C	0.9029	co	1	606	000000110100011001000010181110110001000000010010100010001010101101011111011110000100100100018100111011100001100001010000100080001100111010010101011000100100001010100100100001100100001009000100000100001000100000100100110000000101810100010000000011000000110000110110101110100000100101000100101010000001100100000011000000110100100100000101000100001100010100101110100101001001111001000010011100001000011…	GTEx_normal	0.000985	47
EFS	FXYD1	0.7194	co	1	403	110111001011111001110010011101010110101100011010000801001100111101111111011100100110111000810010111100181101110100101081110010001101110101111111001011101011011010110001111001110011111019011110010101811101010111011100111110010101111111010011100110110111111001101100101111010011001001018110011111000101100000001110111100010110111000110110101100011108111111010110110011101101111011011110011110001119100…	TCGA-LUAD	1.071e-05	47
MMP28	SNX25	0.7235	co	1	316	000000010100000000000000008000000000000000000100000010000000001001001000000100000000000000080000001000000000000000000000000000000000001010018001001000100000000000000010000000000000000009000000000000000001000000000109000000000010010100000000000000010000100000000100000001000000000000000100900000000100000000000000000000000000000000000000000000088000010010001000000001000000000000000000001000000000000…	TCGA-NORMAL	0.0003529	47
TOP2A	MELK	0.9018	co	1	571	010000010000011001000010001010010000000000010010100010001010801101011101011110000100100100010100111010100001000000010000010000001100010010010100011000100000001000100000100001000000001009000100000100001000100010000100000000000101810100010000000011010000110000110110100110100000100101000100901010000101100100000081000000110000000100000100000100001100010110100110000101001001011001000010011000001000011…	GTEx_normal	0.0002592	47
NEK2	GYLTL1B	-0.7189	co	1	279	101100101111111000000110101111180001101100001010100000110010001100100001001100100101110000100100110011110000010001001000110000001110101010000101011111001000001011100001011100111110000019111010010100000111100110110010011010110000111000010010800001010000100010010100100101100000111108000000910100010111100101000810101000111110111100111001000110001010100110101000800001001001010001110100010000000000011…	TCGA-LUAD	1.071e-05	48
CDCA5	CCNB2	0.9018	co	1	630	010000110100011001000010101011110001001100010010100010001010101101011011111110000100110100018100111111100001010001110000110000011100110010010101011000100100001000100000101001101010001019100101000100001000110110100100010000000101010100010000000011110000110001110110100110100000100101000100101110000101100101100011000000110110000100000101000100001100010110101110100101001101011001010010011100000001011…	GTEx_normal	0.000985	48
LMO2	TNXB	0.7471	co	1	77	000000000000000000000000000000000000011000000000000000000000000000100000000010000000000000108000000000010000000000000000000000000000000080000000000000000000000000000000000000000000000009000000000000000000001000000000000000000000000000000000000000000000000000000000000000000008000000000001000000000000000000000000000000000000000000000000000000008010000000000000000000000000000000000100000800000000000…	TCGA-LUSC	6.175e-06	48
C2	FGFR2	0.7228	co	1	296	000000000000000000000000000100000000000001000000000010000000000000000000000100010000000010700000000000000001000001000000000000000000000000000000000000000000000000000001000000000000000009000000700000701001000000000000000000000001000000000000000010000000100100000000007000000000100000077100900010000000000000000000000070000000000000000000100000000000007110000001000001000000001000000000011000000000008…	TCGA-NORMAL	0.0003529	48
SEMA6A	ARHGEF15	0.7181	co	1	472	111111111111011011111111010111111111018111011110118000111111111111111101111011111110111101017101111111080111110110101801111111111101011811118110101111111111101101110110001181001111110109111111101111010100111111110110111111111110111111111101810001110100010111111111110111111111111111111010011111011111011110111110111111101011101110001111111101111101111100111101001001111111101011011110111101010110011…	TCGA-LUAD	2.635e-07	48
OR7D2	INSRR	-0.7483	co	1	49	999099999999999999900999999999999999999999999999999999999999999999999999999909999999999999099999999999999999999999999999999999999991999999999999999999999999999999999999199999999999999999999999999999999999999999999999919999999999999999999999997999999999999999999999919999919999999999999999199999999999099999999999999999999990909909999999999999909999999990999999999999999999999909909999999999999999999…	TCGA-LUSC	0.0001439	49
KRBA1	FXYD1	-0.7189	co	1	96	700000000010000000100000010000000000101000001100000000000000000010000000000000001001000100800000000000011101100000000080000000000000100100001000100100000000000100000010000000010011100009000010000100800000000000011000001100010018001010000010000100000001000000000000000000000010000000018000001100000100000001001700001000000000000000110000001000000010000000000000700000000000100000000000000000000109000…	TCGA-LUAD	0.000229	49
LAMP3	LMO3	0.7226	co	1	335	000000000000000000000000000000000000800000000000000010000000000000000000000100001000010100000000000000000000000000010000000000000000000000000000000000000000000000000001001000000000001009000000700000801001000000000000100000000000000000000000000010100000100000010100000000000000000000000100900010000000000000000000000000000001000000000000000010000100000110000000000010000000000000070000000000000000000…	TCGA-NORMAL	0.0003529	49
TMEM204	EFS	0.7186	co	1	365	100111001011111000110010010001010110101000011000000101000100111100101111001000100010111180000010111100101101110100001001110010001001110101811111001011101010011010110000011000010011111019011110010101011100010011011100111110010171111011010011100010110111101001101100101111010011000001010110011111000000100000001111111000010110111000110110101100010108101011010110110111101101110010011110010110001111000…	TCGA-LUAD	5.334e-05	49
ASCL4	TCL1B	-0.7444	co	1	36	999999999999999999999999999999999999999999999999999999999999999999999999999999999999999999999999999999999999999999999999999999099999999999999999909999999999999999999999999999999099990999999999999999999999999919999999999999999999999999999999999999999999999999999999999999999999999999999999999999999099999999999999999999999999999999999999999999999999999999999999999999999999999999999999999999199999999…	TCGA-LUSC	1.012e-06	49
TPX2	MYBL2	0.9017	co	1	612	010000110100011001000010101010110000001100010010100010001010101101011111011110010100110100010100111010100001100000110080110000011100110010010101011000100100001000100000101001100000001009100100000100001000100010100100110000000101010100010000000011010000110000110100100111100000111101000100101110000101100101000011000000010100100100000100000100001100010110101110100101801101011001000010011100001001011…	GTEx_normal	0.000985	49
TPX2	NCAPG	0.9017	co	1	590	000010110100011001000110101010010000000100010018100010001010101101011011011110000100100100010100111010100001000000110080110000011100110010010101011000100100001000100000100001001000001009100100000100001000100010100100010000000101010100010000000011110000110000110100100110100001100101000180901010000101100100000011000000110010000100000100000100001100010110101110100101001001011001010010011000001000011…	GTEx_normal	0.000985	49
EMCN	LMO2	0.7449	co	2	96	000000000010000000000000000000000000010000000000000000000000000000000000000000000000000010108000000010010000001000000000000000000000000000000000000000000000000000000000000000000000000009000000000000000000001000000000000000000000000000000000001000000000000000000000000000000000000000000001800001000000000000000000000000000000000000100000000000000010000000000000000000000000000000000010000000000000000…	TCGA-LUSC	3.211e-05	49
SH2D3C	SOX7	0.7176	co	1	522	111111111111010811011111111011111101808011101111111100111111111110111111000011110111111111108011111111011110110111101111101111110111111811117111110111110111101101111111000111101111111109110111101011110000111101111111111111101110000001111110111101111111010011111111111011111110111111111011010111111101111118111011111011011111111110111111111001111111111001110111811001111111111111111010111111110108111…	TCGA-LUAD	1.833e-06	49
GHR	TEK	0.7169	co	1	641	111111111111111111111111110111111111101111111110111101111101111111111111111101111111111111011111111111181111111111001111111101111111110111111111011111111111111111110110111801111111111109111111111111111110111111110110111111111111811111111111110101111111010111111111111110111111111111101011011111111111111111111110111111111111010111111111111111111111111101111111111101111111111111111111111111111111111…	TCGA-LUAD	1.071e-05	50
RHOBTB2	PIP5K1B	0.722	co	1	301	000000000000000000000000000010000000000000010000000000001000001000000001000100000000000000000000000000000000000000000000000000010000000000000000000000000000000000100001000000000000000009000008000000001000000000000000000000000000000000000000900000000000100000000010000010000000100000000100000010000000000000000000000000000000000000000000000100000000000000000000000000000000000000000000000000000000000…	TCGA-NORMAL	0.0003529	50
CEP55	AURKB	0.9009	co	1	622	000000110000011001000010101010010001000000010010100010001010101101011111111110000100110100010100111010100001110000010000110000011100111010010101011000100100001000100100100001000100001009100100000100001001100110100100010000000101010100010000000011110000110000110110100110100001100101100100901010010101110101000011010000010010101100000101000100001100010110101110100101001001011001000010011100011000011…	GTEx_normal	0.000985	50
FBXW12	POU3F2	-0.7439	co	1	56	990999099999999909909999909999990909999999999990909999999999999999999999999999999999999999090999999999999909999099099999999991999999999999999999999999999990999999999999099999999099999999999999999999099999999999999990909999999919999999099999979999990999999999999999999199999999910999999999999999199999979997999999999990919991999999999990999999999999909999999999999999909999999999999999999999990099999…	TCGA-LUSC	6.175e-06	50
ANLN	KIF11	0.9004	co	1	578	000000110000011001000010001110110001000100010080100010101010101101011011011110010100100100010100111010100001100000010000810000011100110010010100011000100100081000101800100001080000001009100000100100001000100110100100010000000101010100010000000011110000180010010100101110100000100101080100801010000101110100000011010000010010000100000110000100001100110110100110000101001001011001010810011000011000011…	GTEx_normal	0.000985	51
ERLEC1	KIAA1324L	0.7197	co	1	197	700000000000000000070000000000000000000000000000000000000000000000000080000100000000000000000000000000000008000000000000700000000000000000000000800000000700000070000000000000000000000009000007000000700000000000000087000000000000700000000000000000000000000000007000000000000000000000000000700000000000000000000080000000000000000000700000000000000000008000000000000007000000000000000000000070000000000…	TCGA-NORMAL	0.0003529	51
C2	MYO1G	0.7447	co	1	567	000010010010100110100000010000081100008000001001001000001010010000000101010010000100100001718100110000001100001110100811001100081000000110001010000100101101010100000010000010010000000009101000000111700000001000000000001001110010110011100011101001001001011010001080000110110101001000107011900101811000101000110010001010110000000101110000001001100008000000000000010000118100100101110100100101010010110…	TCGA-LUSC	0.0001439	51
AURKB	TPX2	0.9	co	1	577	000000110100011001000010101010010000000000010010100010001010101101011001011110000100100100010100111010100001000000010080010000011100010010010101011000100100001000100000100001000000001009000100000100001000100010100100010000000101010100010000000011110000110000110110100110100000100101000100801010000101100101000011000000010010100100000100000100001100010110101110100101001001011001000010011000001000011…	GTEx_normal	0.0002592	51
ITGA1	KANK3	0.7159	co	1	96	100000000110100000000000000000000000109000001000100001101000110000110101100001000101000100000000001110000000000101000100101000000000100000101007000010100180011000000000010000000000000009000000010000000010000000000000000100000010000000000000000000000000100000100000000001000000080100000000010100000000000018000000000000110000001000000001001010000000000000000000800000000000000000000100000000000001000…	TCGA-LUAD	1.071e-05	51
TSPY1	TSPY3	0.7447	co	1	47	999999999999999999999999999999999999999919999999999999999999999999999999999999999999999999999999999999999999999999999999999999999991999999999999999999999999999199999999999999999999999999999999999999999999999999999999999999999999999999999999999199999999999999999999999999999999999999999999999999999999999919999999999999999999999999999991999999999999999999999999999919999999999999999999999999199999999…	TCGA-LUSC	0.0001439	51
TNS4	SMKR1	0.7147	co	1	84	910000000000800010000000000000000000000000000001110000000000000000000010101001010010000001901017000100000000000010000010000000110001000000001010000000110000190100000000000000000000070109000001100000000000001001001000000100000000100000001000000000000000001000000010001000000000001000001000900000701000000000000000000011000000000000000010000001000000000000010000000010010100000100000000000070000100001…	TCGA-LUAD	2.635e-07	52
PPIAL4A	IL36A	-0.7429	co	1	57	999999999999999999909999909999999999999999999999999999999999999990999999999999999999999999999999909999999999999999099999999999999009999999999999999999999990990799999999999999999999999999099999999999999999999999999999199999919999999999999999999999999999999999999990999999909991999999999999999199909909999990999999999999999999999999991999099909999999999999999999999999991999999999999099999999999999999…	TCGA-LUSC	6.175e-06	52
EFS	NEK2	-0.7157	co	1	328	111111101111100000110110110101000110101100001010100101100110010010100110000100110110081000000110100110111100100111101001100010011101011111101010000011001111011010010101011000111011110019011110010001010111011101111000101111010000101011000111100001110111001011011010001001110011111100010010910101010100100000001110111000110110011010111010101100010011101001111001111011100100100010111100000110001111110…	TCGA-LUAD	1.833e-06	52
CACNA2D2	ANK3	0.7195	co	1	329	000000010000000000000000000000000000000000000000000010000000001000001070000107000100000100087000001007000000000000010000000000700108810800000007080000000000700000000001000080000000001709008000000000000000000000007000100700000001000000000000000010000000100000000000000000000000000800000100900000700000700000000000000070000010000000700100000007000000017100001100700000000000811000000000011070000008000…	TCGA-NORMAL	0.0003529	52
DLGAP5	TOP2A	0.8989	co	1	582	010000110000011001000010001110010000000100010010100010001010101101011001011110000100100100810100111000100001000000010080110000011100110010010100011000100100001000100000100001000000001009000000000100001000100000000100000000000101010100010000000011010000110010110110100110100000100101000100901010000101100100000011000000110000000100000100000100001100010110101110000101001001011801010010011000001000011…	GTEx_normal	0.0002592	52
DNAH2	EFCAB12	0.8999	co	1	290	900001000000000010100000000000000000009001000000000010010000000001011000010070010000010000000000000000010800000000100001000000001100000000000100000000000001100000000000001090000100000009000000000000000000000010000000000000010000000000010001000000000000100000009000010000000100100010000000901010000000110000010000000000000010000100001000100000100100100110001000000700000000000009900000000000000000000…	GTEx_normal	0.000985	52
MMP28	FGFR2	0.7193	co	1	349	000000010000000000000000000000000000000000010000000010000000100000001001010100000000000000010000001000000000001000010000000000000000000800000001001000000000000000000000001000000000000009000000700100000001000000000009010000000101000000000000000010000000100000000000007010000001100000070100701010000000001000000000000070000000000000000000000000000100007010000000000000000010000000000000001000000000000…	TCGA-NORMAL	0.0003529	53
CDCA5	ASF1B	0.8982	co	1	600	010000111000011001000010101010010001001100010010100010001010101101011011111110000100100100010100111110100001000001110000010000011100010010010101811000100100001000100000011001100010001019100101000100001000100010000100010000000101010100010000000011110000110001110110100110100000100101000100801110000101100101100011000000110110000100000100000100001100010110100110100101001101011001000010011100000001011…	GTEx_normal	0.000985	53
LMO2	ROBO4	0.7434	co	3	107	100000000000000000000000000000000000111000000000000000000000000000000000000010000000000000108000000000010000001000000000000000000000000000000001000000000000000000010000000010000000000009000000000000000000001080000000000000000010000000000000000000000000000000101000000000000000000000000001000001000000000001000000000000000000000000000000000000000010000000000000000000000000000000000010000000100000000…	TCGA-LUSC	0.0001439	53
S1PR1	NRN1	0.7158	co	1	572	011111111110101111111101111111110101101101011110100101111111111111111111111011111101101101010100111011011111011010101011101101111100111101011101011111101110010011110111111100111111101119011111111111011010111110010110101011011111011111111111101110111111010101001101111111111111111111111011010111110010101111111110101110110110111100111000101110010000111111111111111101011110111011101111111111111111111…	TCGA-LUAD	0.000229	53
GLIPR2	H2AFY2	0.7139	co	1	302	010110001000001001001111100010011110100100010100000100010001111101101000100001011001011000001111100110000011100100111081001110001011081110101100011101010111111001101110010100110010010109111010000111010010001001010110000110101100010100000111000000100001010101101010018101010011001001118001011100111000111001101111111010011111010010101001000100010007000001110110000011110111011010101111010100800110000…	TCGA-LUAD	1.833e-06	53
AC023632.1	AL138847.1	0.7115	co	1	44	999999999999999999999999999999999919199999919991199999999999999999999999999999999991999999999999999999999919999999999999919999999999999999991991999999999999999199999999999999999999999999999999999991919999999999999999999999999999999991999999919999999999999999999999999999919999999999919999999999999999999991999999999999919999919999999999999999999999999999999999199999999999999999991999999999199991999…	TCGA-LUAD	5.334e-05	54
PCDH12	GPR116	0.7421	co	1	616	100101001010100110111000000001000011100000101000010100000001000000110010000000110001000011100000000000011100001100001010101010000011000001100010100110001100010110010000010110010000010109001010100100110100000000001011001000011000101011000010101000001111000000001000001000100010000101000010810001001000110000001101100011001000010001110010011001000001001000000000011000100000000100110001000011100000100…	TCGA-LUSC	3.211e-05	54
CLEC1A	STIL	0.7439	co	1	45	000000000000000000000010000000080000000000000000080000000000000008001000000000000000000180808000000000000000000000000080000000080001000000008000000000000000000000000000000080000000000009000000000000000001000000000800000000000000000000000000000000000000000000000000000000000000000000000000800000000000000000000000000000000010000000000000000010000000000000000000000000000000000000100000000000000000000…	TCGA-LUSC	0.0005608	54
KIAA1324L	LAMP3	0.7186	co	1	289	000000000000000000070000000000000000800000000000000000000000000000000080000100000000000100000000000000000008000000010000700000000000000800000000800000000700000070000001000000000000000009000000700000700000000000000087000000000000700000000080000010000000100000000800000000000000000000000000900000000000000000000000000000000000000000700000000000000000008010000000000010000000000000070008000070000000000…	TCGA-NORMAL	0.0003529	54
DNAJA4	SAPCD2	-0.7114	co	1	96	100170000070001000000000000101000000000100000000010001000000000100000000001000101000000000001000000000010700000000000000000010000000100000001001000010007000000010000010000170100000100009100010010011000000000001017000000011100001000000000000000000100000000000001010007000000070110000010000700087000000000000001700001110000000100000100000000000010010000801000000000700710110700100000000000000000101001…	TCGA-LUAD	1.071e-05	54
CDCA8	UBE2C	0.898	co	1	601	000000110110011001000010101110110000000000010010100010001010101101011101111110000100100100010100111011100001100001010000110080001100110010010101011000100100001000100000100001000000001009000100000100001010100000100100110000000101810100010000000011000000110000110110101110100000100101000100001110000101100101000001000000110100100100000100000100001100010180101110100101001001011001000000011100001001011…	GTEx_normal	0.000985	54
LMO2	STARD8	0.741	co	1	87	000000000000000000000000000000000000010000000000000000000000000000000000000000000000010000008000000000000000001000000000000000000000000000000000000000000000000000000000000010000000000009000000000000000000001000000000000000000000000000000000000000000000000000000000000000000000000000000001800001000000000000000000000000000000000000000000000000000000000000000000000000000000000000000000000000000000001…	TCGA-LUSC	1.012e-06	54
ETNK2	SLC16A14	0.7117	co	1	130	100001000010001170111000000000000000000000001001100000000100001000000710007007000010000001000011010101000101000000000001010000110000010100107000000000000700700710100000000000000007010009011111100000000010001000000000000100000000001000011011000000100000100100000010000100110011100000010010000700100000000010000000000000000000010000100000100001000000100000010000010000000000000000001001000071000000100…	TCGA-LUAD	0.000229	54
RRM2	CDCA5	0.8978	co	1	575	000000110000011001000010101010110000001100010010100010001010101101011011111110080100100100010100111000100001000000110000110000011100010010010101011000100100001000100000000001000000001019100101000100001000100010000100010000000101010100010000000011010000110001110100100110100000100101000100801010000101100101100011000000010010000100000100000100001100010110101110100101001101011001080010011000000001011…	GTEx_normal	0.0002592	54
FBLN5	AOC3	0.7424	co	2	110	000000000000000110011000000000000000000001000000000000000000000000000010000000000000000010800000000000010100000000000010000000000000000000100000100000000100000001000000000000000000000009000000100000100000000000000001000000000000000000001000001000000000000010000000000001008001000010001000000000000000000000000000000000000001000100001000000000000080000000000000000000000010100100000000000010000000001…	TCGA-LUSC	0.0001439	55
ITGB4	CASC5	-0.7058	co	1	328	111010001001011010001100110001100111001111010101011100100001110010010111010001001010110001108011000101000110110010100011110100100001011101001010100111110010100101011111101110101101010119100101001000001001011110101011000110001010100000111101001000111111001100111111011111001000011110100001010001811000010011001001011111011101111010000001110011110011100001111001101010110010100110001011010111011101010…	TCGA-LUAD	1.833e-06	55
C2	KIAA1324L	0.7181	co	1	309	000000000000000000070000000000000000800000000000000000000000000000000080000100000000000000700000001000000008000000010000700000100000000800000000800000000700000070000001100000000000000009000000000000700000100000000087000000000000700000000080000010010000100000000000010000000000000000007000900000100000000000000000000000000000000000700000000000000000008010000000000010000000000000000008000070000000008…	TCGA-NORMAL	0.0003529	55
SPRR2D	SPRR1B	0.7387	co	2	289	900099999090000090010900009000090000009009090000990091900000990190000000909090091990009000900090009909190900101990091099000000990019090900099900009001009009010990990099900099001099199099100909900000900009099100009909009000901009000099000009009000009000090990009900009000000000010009009990900000099900019000900900900090909909090000990000001010090909900000000090009999990000900019000000000990000000910…	TCGA-LUSC	1.436e-09	55
TPX2	TROAP	0.8977	co	1	630	010000110100011001000010101110110001000100010010100010001010101101011011011110010100110100010100111010100001100000110080110000011100111110010101011000108100001000100011101001101000001009100100000100001001100010100100110010010101010100010000000011110000110010110110100111100001111101000100101110000101100101000011000000110110100100100100000100001100010110101110100101001101011001010010011100001001011…	GTEx_normal	0.000985	55
CLEC14A	NRN1	0.7079	co	1	573	011111111110110111111101111111110101101100011110100101111111111111111111111001111100101101010100111011181111111010101011101101110100111101011101011111101110111011110110111111111111111119011111111111010000111111110110111011011010011111111111101100111111010101011101111111111111111111111011811111110110101110111110111110110110111100111010101110010000111101111111111101011110111011101111111111110111111…	TCGA-LUAD	0.000229	55
TMEM163	PIP5K1B	0.716	co	1	276	000000000000000000000000000000000000000000010000000000001000001000000001000100000000000080000000000000000000000000000000000000010000000000000000000000000000000000100000000000000010000009000008000100001000000000000000001000000100000000000000900000000000000000000010000010000000800000000000901000000000000000000000000000000000000000000000000100000100000000000000000000000000000000000000000000000000000…	TCGA-NORMAL	5.941e-05	55
C3orf65	CYP3A4	-0.7413	co	1	79	999999990999099999999999999999999999199999909999999999999999999999999990919999999999999999999999999999999999991199999999999909999999999999099999999099999999999999999999999999999979999909999999999999009999999999999999999999919799999909999999099999999999999999999990999919999999999999979999907999999909999991999999999999999990999909999999999999999999999999999999999999999999999999999919999999909990999…	TCGA-LUSC	0.0001439	56
KIAA1324L	FGFR4	-0.7075	co	1	146	000000000000000010070100000000001000100000000110081000000000010000110018000000000010010000101001010100010001100000801100700100000000000100000010100010000710171171018100080001010000000009101001000001710000011010100017108001000000700000000010010001000001000010100000000080111001000100100000700008001000000001100101001000000000001000701000100000000010001001000000100000000000000110001101000070000000011…	TCGA-LUAD	0.000229	56
MYCT1	GJA1	0.7056	co	1	374	110111001100001011001110110010000111000010011110111100001101111101001111101000101111111180010101101000080110101100100011010000170010110110010110181011011011100011101111111110110010101009011111100111011100000100011111111100111101111111010111100000010011010101011111101010111011101011011001811110101001101100111110111101111101010110101010111100001100111001111111011001110001111100110010011111110100101…	TCGA-LUAD	1.833e-06	56
PTPN13	C2	0.7155	co	1	298	000000000000010000000000000100000000000000000000000010000000000108000070000100000000000000700000007001000000000000000000000000100000000000000087700000000000100080000001000000000000000009000000780000700000000000008700807000000001700800000000000010000000100000000100000000000000000000007008900007700008007000000001000000000010000000700000000000080010100010100100007000000000001000000000008000000000008…	TCGA-NORMAL	0.0003529	56
BIRC5	CDC20	0.8966	co	1	603	000000111100011001000110100010010001001100010010100010001010101101011001011110000100100100010100111010100001000000010000110000011100111010010101011000100000001000100000100001000000001010000100000100001000100000100100110010100101010100010000000011110000110011110110100110100001100101000100801110000101100100000011000000110000110000000100000100001100010110101110100101001001011001010010011000001000011…	GTEx_normal	0.000985	56
SH2D3C	FZD4	0.7064	co	1	71	000000000000000110000000000000000000001000100000010000000100000000000000000011000000000000108000000000000000000001000010000000101000000110100001000000000000110000000000000000000000000009001080000000100000000000000000000000000010010001000000010000000000000000000000000000001080000000000010100000000000000001010001000000010001000000000000000010000000008001010000100000000000000000100000000000000000000…	TCGA-LUAD	5.334e-05	56
FLT1	GPR116	0.7388	co	1	487	000001001000100110111000000000000001000000100000010100000001000000100000000000100001000081001000000000011100001100000010000010070011000081100010100100001000010010010000010010010001000009001010100000110100000000000001000000000000100011000010101000001011000000000000001000000010000000000010800001000000100000000100000010001000010001100000010001000001001000000000011000100000000100110011000010100000100…	TCGA-LUSC	6.175e-06	57
VSIG10	DUOX1	0.7143	co	1	226	000000000000000000070000000000000000000000000000000010000000000000700000000000000000000080007000000000000000000070000070007000000007000000007100000000000000000080000000000070000000700009000000000000800000000000000000000000000000000000000000000010000700100000000000000000080000100000000000700000700000000100000700000000000000000000000000000000000000000000001000000000000000800800000000700700000000007…	TCGA-NORMAL	0.0003529	57
GIMAP6	ITGA4	0.7407	co	2	141	000000000001000000000000000000000000100000000001000000000000000000000000000000000000000000700000000000000000000000000000000000000000100000001001000000000000001000000000000000000000000009000000000000000000000000000000000000000000000000000000000001000000000000100000000000000000000000100000000000001000000001000000000000000000000001000001000000000001000000000000100000000000000000000000000000000001000…	TCGA-LUSC	0.0001439	57
SEMA6A	TEK	0.705	co	2	528	111111111111011011111111011111111111111111011110118001111111111111111101111101011111111101011111111111180111110110101801110101111111111811111110101111111111111111111110101811101111111009111111011111011110111111110110111111101110111111111101810001110100010111111110110111111111111111111011011111011111011101111110111111111011100110001111111181111101111101111111101001111111111011011100111101111110011…	TCGA-LUAD	1.833e-06	57
GTSE1	AURKB	0.8965	co	1	624	010010010110011001000010101010110000000100010010100010001010101101011001011110000100110100010100111110100001000001110001010000011100110010010101011000100100001000100001100001000111001010100110000100001000100110100100110010000101010100010000010011100000110000110110100111100001100101100100801010000101110101000011000000010010101100000100000100001100010110101110100101001101011001010000011100001000011…	GTEx_normal	0.000985	57
CHRNA5	MYO7B	-0.7048	co	1	67	000001100000000000000000000000000000000000000001000100000000000000000000001001000000000001009000000000001000000001000000010000000000010000001100000000010000100000100000010000000010000009000001000100001000000000001000001000010100000000001000001100000000001100000000001000100000100000000000001000100000000009000000000000000000000000000000000000000011000000000000000000000000001100000070000011000000100…	TCGA-LUAD	1.833e-06	58
PADI3	SERTM1	-0.7367	co	1	120	999999999990990999099909990990099990999901999999999990999999999999999990909999099999090999990999999999990999999999999999999999999999999999999999999999099999999999999999199999991999999909099999999999199990090999999990009999999999999999099099990999900999990909999991999999990999909999999990990099099999909990909999999199991999990999999999009919099999999009999990999099099999999999999999999999090999999…	TCGA-LUSC	1.579e-08	58
PIP5K1B	TTC39A	0.7115	co	1	260	000000000000000000000000000000000000000000010000000000000000000000000000000100000000000000000000000000000000000000000000000000010000000000000000000000000000000000100000000000000010000009000008000000000000000000000000000000000000000000000000900000000000000000000000000000000000008000000000900000000000000000000000000000000000000000000000100100000100000000000000000000000000000000000000000000000000000…	TCGA-NORMAL	5.941e-05	58
TPX2	KIF20A	0.8958	co	1	568	000010110100011001000110001010010000000000010010100010001010101101011001011110000100100100810100111000100001000000010080000000011100010010010101011000100000001000100000100001000000001009000000000100001000100010000100010000000101010100010000000011010000110010110100100110100000100101000100901010000101100100000011000000010010100100000100000100001100010110101110100101001001011001000010001000001000011…	GTEx_normal	0.0002592	58
CEP55	TOP2A	0.8963	co	1	604	010000110000011001000010001010010001000000010010100010001010101101011111011110000100100100010100111001100001000000010000110000011100110010010101011000100100001000100000100001000000001009000100000100001001100010100100010000000101010100010000000011010000110010110110100110100000100101000100901010000101110100000011000000110100100100000100000100001100010110101110100101001001011001000010011000001000011…	GTEx_normal	0.000985	58
KANK2	C14orf1	-0.7132	co	1	313	000000000000000000000000000000000000700001000000000000000000000000000000000000000107000000000000000000000000000000000000000000000000000000000007000000000000000000000000000000000000000009000000000000000001000000000000000000000000000000000000000000000000000000000000000000000000000000080008900000000000000008000000000000070000000000000000000000000000000000000000700000000000000000000000000000070007000…	TCGA-NORMAL	0.0003529	58
ARHGEF15	RNF152	0.7018	co	1	415	111111111110110011001111011011111101000111010010101000011101111011101111101011101010110171007100110011170010110111101111011011181010100111008110111111101011101111110110001181111111111109110111111011010100111101010111010111111010111000111111010001011011011110001101111101111111111101111001010101001111011110101111111101100111110010011101111100111111111100101101011001011110000111111011011111010010011…	TCGA-LUAD	3.122e-08	59
AC026202.1	HIST1H2BB	0.7403	co	1	36	999999999999999999999999999999999999999999990999999999999999999999999909999999999999909999099999990999999999991999999999999999009999999991999097999909999999999999999999910999999999999999999999999999999999999999991909199999999999999999999999109901999009999999999999999999999999999999999999999999990999999999999999999919970999999199999999990099999999999999999999999009099999999999900999999990999999099…	TCGA-LUSC	0.0005608	59
GPD1L	PIP5K1B	0.7107	co	1	344	000000000000000000000000000010000000000000010000000010000000001000000001000110000000000000000000000000000000000000010000000000010000000000000000000000000000000000100001000000000010000009000008000100000001000000000000010000000100000000000000900000000000100000000000000000000000100000000100001010000000000000000000000000000000000000000000000100000100000100000000000001000000001000000000010000000000000…	TCGA-NORMAL	0.0003529	59
GTSE1	KIF11	0.8952	co	1	601	000000110000011001000110001011010001000100010010101010101010101101011011011110010100110100010110111010100001100000110001110000011100110010010108011000100100001000100100100001100100001009100100100100001001100110100100010000000101010100010000000011110000110000110100100110100001100101000100801010000101110101000011000000110010001100000100000100001100110111101110100101001001011001010010011000001000011…	GTEx_normal	0.000985	59
KIAA1324L	ANK3	0.7101	co	1	245	000000000000000000070000000000000000800000000000000000000000000000000070000107000000000000007000008007000008000000000000700000700008800800000007800000000700700070001000000080000000000709008000000000700000000000007087000700000000700000000080000000010000100000000000000000000000000800000000900000700000700000000000000070000000000000700000000007000000007000100000700000000000800000000008000070000008000…	TCGA-NORMAL	0.0003529	60
CTAG2	C3orf65	0.7394	co	1	42	990999990999199099999999999999999999999999919999999999909999999999999999999999999999999909999999999999999909999099999999999999999999999999099999999199999999999099999999999999919999999909999999999999999999999999990999999999999999999990999999991999999999990999999910999999999999999999909990999999999999999999999999999999999990999909909999909999999999999999999999999999999999999999999919999999999999099…	TCGA-LUSC	0.0005608	60
USP5	KANK3	-0.7005	co	1	42	000000000000000000000000000000000000009000000100000000000000100000000000100000010000000000011000001000010000000000000100000000000000000110001000000000000000010000000000000000000000000009000000000000010000000000000000000000000010000000000000000000000000000000000000000001010000000110000000700000000000010001000000000000000000000000000000000010001000000000000000100000000000000000000000000100000000000…	TCGA-LUAD	1.833e-06	60
CEP55	UBE2C	0.8949	co	1	616	000000110000011001000010181110110001000000010010100010001010101101011111111110000100100100010100111011100001100001010000110080001100111010010101011000100100001080100100100001100100001009000100000100001011100010100100110000000101810100010000000011010000110000110110101110100000100101000100901010000101100100000011000000110100100100000101000100001100110180101110100101001001111001000010011100001000011…	GTEx_normal	0.000985	60
ITGA2	ASF1B	-0.7036	co	1	174	100001100000000010010010000100000010000011100010010100100000000000000000100001000110000000101011000000070100100008100000000000170001000000001010810000010000100000000001000010000000000107000001100000001011000000008801010100100000000001001000011000001010000001001000001000100001000010000111000000001000101000010000010111001010010100000010010000001000100000011001801010101100100100110001000011100000100…	TCGA-LUAD	0.0008554	61
AIF1	HCK	0.7343	co	1	160	000000000000000700000000000000000000000000000000000000000000000000000000000000000000000000708000000000000700000000000000001000070000000000000000000000000000000000000000000000000000000009000000000000700000000000000000000000000000000007000000000000000000000000000000000000000000000000007000800001000000000000000000000000000000000007000000000000000007000000000000000000000000000100000000000000100000000…	TCGA-LUSC	1.393e-07	61
PPIAL4B	IL36A	-0.7361	co	1	62	999999999999999999909999909999999999999999999999999999999999999990999999999999999999999999999999909999999999999999099999999999999009999999999999999999999990990799999999999999999999999999099999999999999999999999999999199999919999999999999999999999999999999999999990999999909991999999999999999199909909999990999999999999999999999999991999099909999999999999999999999999991999999999999099999999999999999…	TCGA-LUSC	6.175e-06	61
ACSL5	HLA-DOA	0.7287	co	1	319	000000000000000800000000000000000000000000100001800100000000000000000000000000000000000010108000000000000100000000000010000000080000000000000010000000000000000000000000000000000000000009001008000000800000000000000000000000000000000001000010101000000000000000000000008000000000000000007000700000800000101000010000000010000001000001000000000000000008000000000000000000100000000100100000100000100000000…	TCGA-LUSC	1.436e-09	61
ASPM	KIF4A	0.8948	co	1	614	010000110100011001000010001111010000000100010010100010001010101101011001011110000100100100010100111010100001000000110000110000011100110010010101011000100100000000100000101001100000001019100000000100001000100110100100010010000101010100010000000011000000110010110100100111100000100101000100901010000101100100000011000000110010000100000100000100001100110110101110100101001001011001010010011000001000011…	GTEx_normal	0.000985	61
MMP24	PIP5K1B	0.709	co	1	336	000000000000000100000000000010000000000000080000000010001000001000000001000100000000000000000000000000000000000000010000000000010000000000000000000000000000000000100001000000000000000009000008000100101001000000000000010000000100000000000000900000000000100100000010000010000000000000000100000010000000000000000000000000000000000000000000000100000000000000000000000000000000000000000000010000000000000…	TCGA-NORMAL	0.0003529	61
SEMA6A	TNXB	0.7003	co	1	460	101101111111011000111111011111111111018111110110108001111111111111011101111110111110111101018111111011010111110110800801110110110100111801010010811101111111101111111111001111101111111009111111011111010110111111111110111111101110111111111111810001110000010111111101110001180110111011111011001111011118011100811110111101101011111110001111111100118101111001111111001011111111110001011110111801110110011…	TCGA-LUAD	1.833e-06	61
LRRC48	LRRC46	0.8945	co	2	274	001000000000010000100000000001000000010000000000000000000010010001011001010070000000010000000000001000000100010000100001000000007100000000000000000001000011800000000100001000000000000009010000000000000000100110000700000000001000000000010000000000010000000000000000000010100108000080000000901070000000100000110700100000080811000000001100000000100100100710001000000700000000000000000000011000000000000…	GTEx_normal	0.000985	62
TOP2A	UBE2C	0.8944	co	1	566	000000010000011001000010001110010001000000010010100010001010101101011101011110000100100100010100111000100001000000010000000080001100110010010101011000100000001080100000100001000000001009000100000100001000100000000100000000000101810100010000000011000000110000110110100110100000100101000100901010000001100100000001000000110000000100000100000100001100010100101110100101000001811001000000011000001000011…	GTEx_normal	0.0002592	62
PLLP	C14orf132	0.7088	co	1	338	000000000000000000000000000000000000000000080000000010000000000000000000000100000000000000000000000000000000000000010000000000001000000000000000000000000000000000000000000000080000000009000000000000001000000000000008000000000001000000000000000010000000008000000000000000000000100000000100008010000001000000000001000000000000000000000000000000000000000010000000000000000000000801000000000000000000000…	TCGA-NORMAL	0.0003529	62
ARMS2	TINAG	-0.7019	co	1	66	199919091999099999909919999990199999999999999999999199991999199099919099999199199999109919199919910999999999999199999999999911999999111199999999999999199999999999990999099999999909999999990999909999999909999909199109199999919999199019999909999999900099999191999999999999999919990199099999999909999999099991999999999999999099909999999999999999999919999999099909999909999999999999999999099109991099999…	TCGA-LUAD	0.0008554	62
C14orf166B	KCNA7	0.7377	co	2	36	999999999999999999999999999999999999999999999999999999999999999999999999999999099999999999999999999999999999997999999999999999999999999999999999999919999999990999999999909909999999999999999999999999999999999999999989999999999999099999999999990999999999999999999999999999999999991999909999999999999999999999999999999999999091999990999999999999999999999999999999999999979999999999919999999999099999999…	TCGA-LUSC	0.0005608	62
ACKR4	CEP55	0.6993	co	1	260	110000110000111001010110101011010000008010000010100000101010101101011100001100000100111100810110111011100001110000800000118000011100111010010101011000100101001000100111111001101110001019000118010000001011100110100000018000000000010100010001000001010000010000110100109101100010100110100000900000010101010101000010010000111110111100000100000108011010111010101110100011001101011001000010011000011000011…	TCGA-LUAD	1.833e-06	62
TRMT6	MCM8	0.7372	co	1	704	101011001001100110101001010000110110010011101101010101100101000011100100000001001001000011101011000000001110001111000110101101110011000001101011100100010011011101000101000110010001110019011101001011110100011100001011000101001010101011100011111100101018011101000000011000010110001000111011710101111010000001111000010111111101111001111001111011100000001001011001011010100100100110101100100111110010100…	TCGA-LUSC	0.0005608	63
CLEC1A	CDH5	0.7335	co	3	75	100000000000000000000000001000000000000000000000080000000000000000000000000000000000000010808000000000000000000000000000000000000001000000008000000000000000000000000000000080000000000009000000000000000000000000000000000000000000000000000000000000000000010000000000000000000000000000000000000000000000000000000000000000000000000000000000000000000010000000000000000000000000000000100000000000000000000…	TCGA-LUSC	6.175e-06	63
HNF1B	AQP1	0.7317	co	1	458	101000000000000000000000000100000010810000100001000000100000000000000000000000100001000010000010000001010000000000000000010000000008000000001010100000001000010800000000000110010000010109090000000000000000001010001000000100000000001000000000001000000000001000000000000000000000090000009000100008100000000001001100001011001000000101010000110010000000100000000000100000100090100100101000000000100000000…	TCGA-LUSC	1.012e-06	63
SLC16A14	CDC6	0.6992	co	1	90	000000100000001070010000000010000000000000000001100000001100001000000710007007000010000000000010110101000101000000000000011000110100010000100100000000000700700710100000000000000007000009001101100000000000000000000000000100000000000000011000000000100000100100000010001100100010100000000010000700101000000110000000000001000000000000100000000101000000100000010011008000000000010000000001000071000000100…	TCGA-LUAD	1.833e-06	63
TOP2A	CCNB2	0.8943	co	1	580	010000110000011001000010001010010001000000010010100010001010101101011001011110000100100100018100111010100001000000010000010000011100110010010100011000100100001000100000100001000000001009000000000100001000100000000100000000000101010100010000000011000000110010110110100110100000100101000100901010000101100100000001000000110000000100000100000100001100010110101110000101001001011001010010011000000000011…	GTEx_normal	0.0002592	63
SDR42E1	ABCA3	0.7062	co	1	247	000777000000000000700700000000000000000000000000000000000000000001000070000100000000000000010000000000077000000000000000000000000000000000000000000000007000007070000000000070000000000009000000000000001000070007000000000000000000700007000000000710000007107000000070000000000000000000070000900010000000700100000700000000000100000000000000000000001007000010000000007000777000001000700000701000000000700…	TCGA-NORMAL	0.0003529	63
KANK2	SEMA6D	0.6993	co	1	534	111111111111111110110111011111111101111101811110101101110111111111101101110100111011111001018110010010181111111111101101110111001111001111110000011111111111111111101110111111181101001119110111811111110110110111111110111011111110111111111110101101110111010111111111111118100111111111111011011111111111111010111110111100111111111010111111111101111118111101111001111111111011001111110111111001111110111…	TCGA-LUAD	1.071e-05	63
ANLN	MELK	0.8942	co	1	579	000000110000011001000010101010110000000000010080100010001010101101011011011110010800100100010100111010100001000000010000010000011100110010010100011000100100081000101000100001080000001000100000000100001000100010000100010000000101810100010000000011110000180000010110100110100000100101080100801010000001100100000011000001810010000100000100000100001100810110100110000101000001011001000810011000001000001…	GTEx_normal	0.0002592	64
OIP5	ZWILCH	0.7353	co	2	724	101101000010100110111001010001001110110011101101011101000101010010100100000001101010000011101010000001011110101100001110000110100001001100101011100110001001110110011001010110010011110009011010111101110110001000001011101101011000101011101011101100001111001100001011010001011011100010011010000801111010001018111100010011001001010101111010111001000011001001010001011001110010100110101101100011100018100…	TCGA-LUSC	0.0005608	64
SYT15	RAP1GAP	0.7055	co	1	322	000000100000000000000000000100000000000000000000000010000000000000000000000100000000000000000000000000100000000000010070000700000000000000000000000000010000000000001001001000000000000009000000800000001011000000000000000000000000000000000000000010000000100000000000000000000001000000000000900010000000000000000000000000000000000100000000000000000000007000000000000010000000000700000000080000001000000…	TCGA-NORMAL	0.0003529	64
DLGAP5	FOXQ1	-0.7003	co	1	427	111000110101011010001110101100100011701111110011111100100110101100111111111101010110111100819111110110110101100010100191111011011101110011019071110100110100101100101101101000101001010119100111711100001011100110101001010710101000010107010010010001111010111011110111107001101001110100001001901100707101110001010011110111111111110110000010170101011101100010111107101010101111100701711010011111011110011…	TCGA-LUAD	0.0008554	64
UBE2C	MELK	0.8938	co	1	594	000000110010011001000010181810110000000000010010100010001010101101011111011110000100100100010100111111100001100001010000110080001100111010010101011000100100001010100000101001000000001009100100000100001000100010000100110000000101810100010000000011000000110000110110100111100000100101000100801010000001100100000011000000110000000100000100000100001100010180101110100101001001811001000010011100001000011…	GTEx_normal	0.0002592	65
PIP5K1B	CPM	0.7045	co	1	348	000000000000000000000000000000000000000008080000008010000000001000000000000110000000000000000000000001000000000000000000080000010000000000000000000000000000000000100001001000000010000009000008008000001001000000000000010000010100000000000000900000000000100000000010000000000000100000000110000010000000000000000000090000000000000000000000000100000000000110000000000000000000011000000000010000000000000…	TCGA-NORMAL	0.0003529	65
ANKS4B	MS4A18	-0.6972	co	1	54	199991999999999999919999999999999999999910999999919999999919999999999991199999999999009999999111999999999999199999999199999999990990999999999999909999909999991999199999999999999999999999999199991999991991999999999999011190999999999999199999919999901999999999999199009190999999999999999999999199990900999999999999990991009919999909999909099999991999909999999991999999990999999999999999999991990999999…	TCGA-LUAD	1.833e-06	65
CLEC14A	GPR116	0.7253	co	1	581	100101001010100110111000010000000001000000101000010100000001000000110010000000110000000011000000000000011100001100001010001010000011000001100010100110001000010110010000010010010001000109001010100000110100000000001011001000010000101011000010101000000111000100001000001000100010000100000000810001000000100000000101100011001000010001111000011000000001001000000000011000100000000110110011000011100000100…	TCGA-LUSC	6.175e-06	65
GPC3	CLEC3B	0.6986	co	1	576	111111111110101101100011111111111111100118111111101101110111111111110101111101101011111100000118111111100011101110101081111111111110111011010101110111111110100011111110111100111111111019111118111111010110101111111100101100111100111111010101110100110111011111011011101110000010111101111011011111100111101110111011111111011000111110110100101101100101111101111111011001111111111111111111111110010011111…	TCGA-LUAD	0.0008554	66
RALYL	CFHR4	-0.7241	co	1	35	999999999999999999999999999999999999999919999999919199999999999999999999999999919999999999999999999999999999999999999999999999999999999999999989999999999999999999999999999999999999999999999999999999999999999999999999999999999999999999999999999999999999999999999999999999999999999999999999999999999999999999999999999999999999999999999999999999999999999999999999999999999999999899999999999999999999999…	TCGA-LUSC	6.175e-06	66
SLC16A14	CDK1	0.6953	co	1	62	000000100000001070010000000010010000000000000000100000001000001000000710007007000010000000000010110108000801000000000000010000110100010000000100000000010700700700100000000000000007000009008101100000000000000000000000000800000000000000011000000000100000100000000010001100100000100000000010700700101000000110000000000000000000000000000000000101000000000000010010000000000000010000000000000070000000800…	TCGA-LUAD	3.122e-08	66
KIF4A	KIF20A	0.8935	co	1	606	010000110100011001000010001011010000000100010010100010001110101101011001011110000100100100810100111000100001000000110000110000011100111010010101011000100100001000100100000001100000001019000000000100001000100110100100010010000101010100010000000011000800110010110110100110100000100101000100901010000101100100000011000000010000000100000100000100001100110110101110100101000001011001010010011000001008011…	GTEx_normal	0.000985	66
GPD1L	C14orf132	0.7037	co	1	337	000000010000000000000000000000000000000000000000000010000000000000000000000110000100000000000000000000010000000000000000000000001000000000000000000000000000000000000000000000080000000009000000000000000001000000000008000000000001000000000000000000000000000000000000000000000000100000000100000010000001000000000000000000000000000000000000000000000000000010000000000000000000000801000000000000000000000…	TCGA-NORMAL	0.0003529	66
AURKB	KIF11	0.8935	co	1	637	000000110000011001000010101110110001000100010010100010101010101101011011011110000100101100010100111010100001100010110001110000011100110010010101011000100100001000100100100001000100001009100100001100001001100110100100110000000101010100010000000011110000110000110110100111100001101101100100801010010101110101000011010000110010101100000101000100001100110110101110100101001101011001010010011000011000011…	GTEx_normal	0.000985	66
ESR1	DDR2	0.6977	co	1	126	010000001001000100000100000000000101000000100100010000000001100010000100000000001000000000000000000000010010100011100100000000080000001010000000010000001171001000000000000700000000000009100001000001000000000107000000000000000070000000100010107100000101000010010101000000000110000000017000000000000111010008110010000000000000001000101000000000001000000001101000800000010700000000000010000100000011000…	TCGA-LUAD	0.0008554	67
SERINC1	MIB1	0.7028	co	1	338	000000010000000000000000000000000000000000000000000010000000000000001000000000000000000000000000000000000000000000000000000000000000000000000000000000000000000000000001000000000000000019000000000000000000800000000000000000000001000000000000000010000000000000000800000000000000007000000100700000000000000000000000000000000000000000000100000000000000000000001100000000000000000000000000000000000000000…	TCGA-NORMAL	0.0003529	67
PADI3	FAM133A	-0.7193	co	1	141	990990900099999099090990990990090990099009099099999990909900999999009999909999909999090909099999999999900909990990999090199009990999990999999909099999999999990990999099190001009999999909090999990999999990900909099999900990999999090999099909900999900099990099009991909999909999909009109999899990010999919990900999090909909909090091990090909999990999909900999990100099000990999909009990009999099090999…	TCGA-LUSC	1.579e-08	67
CDCA5	ZWINT	0.893	co	1	614	010000111100011001000010101011110001001100010018100010001010101101011011111110000100110100010100111011100001010001110000110000011100110010010101011000100100001000100800101001101010001019100101000108001000100010100100010000000101010100010000000011110000110001110110100110100000100101000100901010000101100101100011000000010110001100000100000100001100010110101110100101001101011001000010011000000001011…	GTEx_normal	0.000985	67
LRRC23	LRRC46	0.8929	co	1	279	001000000000010000100000000000000000000000000000100000000000010001011001010070000000010000000000001000000100000001108001000000001100000001000000000001000011800000000000001000010000000009010000001000000000100110000700001000010000000001010000000000010008000000000000010010100108000010000000901070000010100000010000100000000811000100001100000000100100100710001000001700000000000000000000011000000000000…	GTEx_normal	0.000985	68
KLF13	ATOH8	0.7025	co	1	253	000000010000000000000000000000000000000000000000000010000000000000000000000000000000000000000000001000100000000000000770000000000000000000000000000000000000000000000000000070000000000009000000000000000010000000000000000000000000000007000000000010100000000000000000000000000000000000000000700000000000000000000000000000000000000000000000000000000000000000000010007000000000000000000000001000000080000…	TCGA-NORMAL	0.0003529	68
CCNB2	MELK	0.8928	co	1	602	010010110000011001000010101010010000000000010010100010001010101101011101011110000100100100018100111111100001010000110000110000011100110010010100011000100100001000100000100001000000001009100100000100001000100110100100010000000101010100010000010011110000110000110110100110100000100101000100001010000101100100000011000000110010000100000100000100001100010110101110100101001001011001010010011100001000011…	GTEx_normal	0.0002592	68
DST	AOC3	0.6956	co	1	430	710001100110001070117110001011011111001111111101111000101100111111011171111111011010101001017111111111101001100000101101011001111101011101810110011011011100101110111110101010001101011109101111101110000010100011000101110111000111000111111101011110101111110101011010111110110007111011008011100111001111110110000010010171101710011100100111101107111100101001110110001001011111011111011001111111001000001…	TCGA-LUAD	5.334e-05	68
LRRK2	PIP5K1B	0.7006	co	1	306	000000000000000000000000000000000000000000080000000010000000001000000000000100000000000000000000000000000000000000000000000000000000000000000000000000000000000000000001001000000000000009000008000000001000000000000000000000000100000000000000900000000000100000000000000000000000100000000100000010000000000000000000000000000000000000000000000000000000000010000000000000000000000000000000000000000000000…	TCGA-NORMAL	5.941e-05	68
MCC	AOC3	0.6953	co	1	487	111001101101001110111111111011111111101111110101111100111111111110101111111101110010111011007111110111101111100011101101011011111101011111811110011111010111101111111111111111101111011117111111111111000010111111011110111111111111110111111101110011111110110111001011111110110110101011108011811111811110111110110010111111101011011010111011111111111118110101111111011011111111011111111011111101111110110…	TCGA-LUAD	1.833e-06	68
LYVE1	GPR116	0.7202	co	1	556	100101001010000110111000010000000001000000101000010100000001000000010000000000110001000081000000000000011100001100001010000010000011000001100010100100001000010180010000010010010001010109001010100000110100000000001011001000010000101011000010101000001101000100001000001000100010000000000010110001000000100000000100000011001000010001111000001000000001001000000000011000100008000110110001000001100000100…	TCGA-LUSC	6.175e-06	68
ISL1	DGKB	-0.7209	co	1	67	999997999999999990999909990900999090999999999990909099999909909919999999909909999999099999090999909900999909100999009190999990990999999999999979199990909999991999999999019990999999909999999999999090999990999999999999090990999090909099909909909999999990999099999999999999909919999799999999999999990990999999909990009999909909999999999090990999999099099009099991997070999999999099101099990990099999999…	TCGA-LUSC	3.211e-05	68
TIE1	GPR116	0.7202	co	1	635	100101001010100110111000010001000011010000101000010100000101000000110110001001110001000011008000000100011100001100001010011010100011000001101010100110001100010110010000010011010011010109001010100100110100000100001011001100011000101011010010101100001111000100000000001000100010000101000010110001001000110000000101100011001000010001111000011001000001001000000000011000101000000110110011000011100000100…	TCGA-LUSC	3.211e-05	69
KIF11	KIF2C	0.8922	co	1	612	000000110000011001000110101011010000000100010010100010001010101101011001111110010100100100010100111010100001100000010080110000001100110010010101011000100100001000100100100001100010001009100000000100001001100110100100010000000101010100010000000011110000110000110100100110100001100101000100801010000101110100000011000000110010000100000100000100001100110110101110100101001001011001000010011000001000011…	GTEx_normal	0.000985	69
HNF1B	WIF1	0.72	co	2	316	100000000000000000000000000000000010900000100001010000000000000000900000000000100001000010000000000000090000000008009000000900000001000900001010900000001000010100000000090100010000010109000000900000000900001010001000000000100000001000000000011000000000000000000000000000000000000000009000900001000000000001001901001001001001090001000000110009000090109000000000100110100090000100091000100000100000000…	TCGA-LUSC	6.175e-06	69
KIAA1324L	ETV1	0.6998	co	1	277	000000000000000000070000000000000000801000000000000000000000000000000080000100000000000000000000000000000008000000000010700000000000000000000000800000000700000070000001000000000000000009000000000000700000000000000087000000000000700100000080000000010000100000000000000000000000000000000000700000000000000000000000000000000000000000700000000000000000008010000000000000000000000000000008000070000000000…	TCGA-NORMAL	5.941e-05	69
JAM2	NRN1	0.6963	co	2	546	011111111110800111111101011110111101101101010110100101111111111111111111111001111100101101010100111011018111011010101081101101110100111101011101001111101110010011110110011110101011101109011111111111010010111101110110111011011110011111111011111100111111000101011101111111111011111111111011701111110110101111111110101110110110111100111010101110010000111101111111811001011110111011101111111111110111111…	TCGA-LUAD	0.0008554	69
TCF21	NSG1	0.7281	co	1	61	000000000000000000000000000000000000001000000000000000000000000010000000000000000000000000901000000000010000000000000010000000000000000000101010100000000000000000000000000000010000000009000000000000000000000000000001000000000000000000000000900000000000000000000000000001000000000000001000000000000000000000000000000000000000000000000000010000000010000000000000000000000000000000000010000000000001001…	TCGA-LUSC	0.0005608	69
ITGA1	PTTG1	-0.6925	co	1	39	000000000100000000000000000000000000101000000000000001000000100000000000000000000001000100000000001010000000000000000000001000000000100000000007000000000010000000001000000000000000000009000000010000000000000000000000000000000010000000100000000000000000000000000000000001000000010000000000800000000000000001000000000000010000000000000000000000000001000000000000100000000000000000000100000000000001000…	TCGA-LUAD	1.833e-06	69
C14orf132	KLF13	0.697	co	1	276	000000010000000000000000000000000000000000000000000000000000000000000000000100000000000000800000000000000000000000000770000000000000000000000010000000000000000000000000000070080000000009000000000000000001000000000008000000000000000007000000000000000000000000000000000000000000000000000000700000000000000000000000000000000000000010000000000000000000000010000000007000000000000800000000000000000080000…	TCGA-NORMAL	0.0003529	70
TEK	NRN1	0.6955	co	1	584	011111111110101111111101011111111101101111010110100101111111111111111111111111111101101101010100111011181111111010101011101101111110111101011101001111101110010011110110111000111011111109011111111111011010111111110110101011011111011111111111101100111111010101011101111111111111111111111011001111110110111111111110101110110110111100111010101110010000111101111111811101011110111011101111111111111111111…	TCGA-LUAD	0.0008554	70
KIF4A	TOP2A	0.8915	co	1	598	010000110100011001000010001011010000000100010010100010001010101101011001011110000100100100010100111000100001000000110000110000011100110010010101011000100100000000100000000001100000001009000000000100001000100110100100010010000101010100010000000011000000110010110110100110100000100101000100901010000101100100000001000000010000000100000100000100001100110110101110100101000001011001010010011000001000011…	GTEx_normal	0.0002592	70
UCP1	HOXB1	-0.7143	co	1	55	999999999999999999999999999999999999999999999999999999999999999999999999999909999999999999999999999999999999999999999999999999999999999999999999999999999999999999999999999990999999999999999999999999999991999999990999999999999999999997999999991999999999909999999999999999999999999999999999999999999999999999999999999999999999999999999999919999999990999999999999999999999999999999917999999990999999999…	TCGA-LUSC	1.393e-07	70
ASPM	KIF2C	0.8916	co	1	616	100000110100011001000010101111010000000100010010100010001010101101011001011110010100110100010100111010100001000000010080110000011100110010010101011000100100001000100000101001101010001009100000000100001000100010100100010000000101010100010000000011000000110010110110100111100001100101000100101010000101110100000011000000110110100100000100000100001100110110101110000101001001011001010010011000001000011…	GTEx_normal	0.000985	70
AC142381.1	KCNJ4	-0.7131	co	1	52	999999999990919999999999999990999999999999990999999199999990999999999999999999999999999909999999999999999999999990999999999999999999999909999999999999999999990990999099099999999099999999999990999999999999999999999999999999909999999999999999991999999999910919999999990999999999999999999999999999999909999999999999999919999991999999999999999999099999999999999999991999999999999999999999999999999999999…	TCGA-LUSC	1.579e-08	70
SEMA6A	RHOJ	0.6905	co	2	508	111111111111011011111111011011111111111111011110118000111111111111111101111001111110111181018111111111180100110110101801111110111111011811110110101111001111111111110111101111111111111107111111101111010100011101010110111111111110111110111111810001010101010111111110110011111111111111101011011111011111111101111110111111110011110110001111111101111101111001111111001011111111111011111111011111110110011…	TCGA-LUAD	1.071e-05	70
ECSCR	LMO2	0.7187	co	3	113	000000000000000010000000000000000000010000000000000000000000000000000000000010000000000000108000000000010000001000000010000000000000000000000000000000000000000000000000000000000010000009000000000000000000001000100000000000000000000000000000001000000000000000000000000000000000000000000001000001000000000000000000000000000000001000000000000000000010000000000000000000000000000000000010000000100000000…	TCGA-LUSC	3.211e-05	70
C11orf54	CAT	0.6963	co	1	335	000000000000000000000000000000000000000000000000000010000000800000000000000110000000000000000000000000000000000000000000000000000000000000000100000000000000000000000001000000000000000009000000000000000001000000000000008000000000000000000000000010000000100000000000000000000000000000000100700000000000000000000000000000000000000000000000000000000000000010000000000000000000000000000000000000000000000…	TCGA-NORMAL	0.0003529	71
LCE1B	HEPACAM	-0.7073	co	1	31	999999999999999999999999999999999999999999999999999999999999999999999999999979999999999999999999999999999999999999999999999999999999999999999999999999999999999999999999999999999999999999999999999999999999999999999999999999999999999999999999999999999999999999999999999999999999999999999099999999999909999999999999999999999999999999999999999999999999999999999999999999999999999999999999999999999999999…	TCGA-LUSC	5.094e-12	71
SFXN4	F10	-0.6849	co	1	30	000000000000000800001000000000000000008000000000100100000000000010000000000000000000000000000000000000000000000000000000010000000000000000100000000000000000000000000000000000000000000109001001100000000000000000001000000000000000000000000000000000000000000100000000001000000000000000001000900000100000000000000000000011000000000000100000000000000001000000000000000000000000001000000000000000000000000…	TCGA-LUAD	7.522e-09	71
KIF4A	KIF2C	0.8915	co	1	603	000000110100011001000010101011010000000100010010100010001010101101011001011110010100100100010100111010100001000000110080110000011100110010010101011000100100000000100000100001100010001009000000000100001000100110100100010010000101010100010000000011000000110010110100100110100000100101000100901010000101100100000011000000010000000100000100000100001100110110101110100101001001011001010010011000001000011…	GTEx_normal	0.000985	71
FAM110C	NEK2	-0.6895	co	1	418	011110100100011010010111101101101101011110110010101000101011111101011001001100011100111101000100110111170110010110101011111010111100111111001101110000000110001101111111101100101100110119100001111111001111111111110010110011101100110001010101017001110100110011111111100011111007111100011011911000001100110001001011111090110111101110011010000101111110100111101001100101011111000711111011010110001101011…	TCGA-LUAD	5.334e-05	71
PRR11	DUOXA1	-0.6896	co	1	302	110111001101010000010111100001007101100101000010011100100000100100110100100001000000010110107001100110100001100100100090110100001007101111117010011000100100101111010000100071000001000101101010100000700100000110001111011110000000110101010011011001000107011001100011010100171001001111011000711000711101001000001711111011110001011110110011000007011101111000000101107000001171700171711001100070000101010…	TCGA-LUAD	0.000229	71
SPOCK2	DUSP4	0.7152	co	1	434	000010010000700000700001001000100100000001000107701100000000110000001000000000000170010100010007000710000010100000101010101010000000101110000000110100000010701000011110000101100100000009000000701010000000100001100100110700000000100070100007010001000000011010001171000001700000000100010001800700010101010070000000000070100110100100000101100010010017010000100100100000001118000101000000001170000000010…	TCGA-LUSC	3.211e-05	72
CCNB2	KIF2C	0.8914	co	1	607	000000110000011001000100101010010000000100010010100010001010101101011001111110010100100100018100111010100001000000010080110000011100110010010101011000100100001000100000100001100010001009000000000100001001100110100100110000000101010100010000000011100000110010110110100110100000100101000100101010000101100100000011000000110110000100000100000100001100110110101110100101001001011001010010011100001000011…	GTEx_normal	0.000985	72
SCEL	ANXA3	0.6947	co	1	301	000000000000000080000000000000000000100000000000000010000000000000100000000000000000000000000000000000000000000000000000000000000000000000000000000000000000000000000000000070080000000009000000000100000001000000000000000010000000001000000000000000000000000000000000000010000000001000000100001000000000000000000000000070000000000000000000001000000000000000000000000000000070900000800000000000000000000…	TCGA-NORMAL	5.941e-05	72
TOP2A	CDC20	0.8911	co	1	591	000000110000011001000010100010010000000100010010100010001010101101011101011110000100100100010100111010100001000000010000010000001100110010010101011000100000001000100000100001000000001009000100000100001000100000100100000000000101010100010000000011000000110011110110100110100001100101000100901010000101100100000011000000110000100100000100000100001100010110101110100101001001011001010000011000001000011…	GTEx_normal	0.0002592	72
KIAA1244	LAMP3	0.6953	co	1	276	000700000000000000000000000000000000800001000000000000000000000000000000000800000000000100000000000000000000000000000000000000000000000000000000000000000000000000000001000000000000000009000000700000001000000000000000100000000000800000000000000000000000100000000180000000000000000000000000900010000000000000000000000000000001000000700000000000000000000110000000000000000000000000770000000000000000000…	TCGA-NORMAL	0.0003529	72
LDB2	GHR	0.6872	co	1	594	111111111111110111111111111011111111101101111110111100111101111111111111111001111011111181011111111111181111111111001111111111111111110101111111011111111111111111110110111101111111111109111111111111110100111111110110011111111110811111111111110101111118011111111111111110111111111110101011011111111111111111110110111111111111010111111111011101111111111101111111111001111111111011111111111011110111111…	TCGA-LUAD	1.071e-05	72
MELK	CDC20	0.8911	co	1	627	000010110110011001000110101010110000001100010010100010001110101101011101111110010100100100010100111010100001010000010000110000011100111010010101011000100000001000100000101001000000001010100100000100001001100010100100010000000101810100010000010011110000110011110110100110100000110101000100801110000101100100100011000000110010111100000100000100001100010110101110100101001101011001010010011100001000011…	GTEx_normal	0.000985	73
LOR	RPL29	0.7157	co	1	131	999999990999909999999999999999099990999999999999909999999999999990999999999999099991199999099999999999999999900999999999999919999990999999999999100999999999999999999999999990999999999999999999999999909999009999999909999999999999909999999999990909999999999990099191909999999909990990099999999099999999099999999999999999091999999990901999999919910999999999099190999909999999999999990999099999909999999…	TCGA-LUSC	0.0005608	73
TOP2A	KIF11	0.8908	co	1	572	000000110000011001000010001010010000000000010010100010001010101101011001011110000100100100010100111000100001000000010000110000001100010010010100011000100100001000100100100001000000001009000000000100001000100000000100010000000101010100010000000011010000110000110180100110100001100101000100901010000101110100000001000000110000000100000100000100001100010110100110000101001001011001010010001000001000011…	GTEx_normal	0.0002592	73
LHX1	KRT85	0.7062	co	1	35	999999999999099999999990999099999999999999999999999999999999999999999999999999999990999999999999999999999999999999999999999999999999999999999999999991999990909999999909990909990999999999990999999999999999999999999979999999999999991999999999997999999999999999999999999999999999999999999999999999999999999999999999099999999999999999999999999999999919999999999999999999999999999999999999999999999999999…	TCGA-LUSC	1.436e-09	73
RFX4	UBE2U	-0.6932	co	1	36	999999999999999999999999999999999999999999999999999919999999999999999999999999999999999999999999999999999999999999999999999999999999999999999909099999999999999999999999999999999999999999999999999999999999999999999999999999999999999999999999997999999999099999999099999999999999999999999999999999999999999999999999999999999999999999999109999999999999999999999999999999999999999999999999999999999999999…	TCGA-NORMAL	5.941e-05	73
CEP55	KIF2C	0.8911	co	1	636	000000110100011001000110101010110001000100010010100010001010101101011111111110010100110100010100111011100001110000010080110000011100111010010101011000100100001000100000101001101010001009100100000100001001100110100100110000000101010100010000000011110000110010110110100110100001100101000100901010000101110101000011000000110110111100000100000100001100110110101110100101001001011001000010011100801000011…	GTEx_normal	0.000985	73
LDB2	NRN1	0.6889	co	2	541	011111111110100111111101011011110101101100010110100100111111111111101111110001111101101101010100111011081111011010101011101101111100111101011101001111101110011011110110111100111111101109011111111111010000111101110110111011011110011111111081101100111110010100011101111111111111111110111011011111110110101111111110101110110110111100111110101100010000111101111111811001011110111011101111111111110111111…	TCGA-LUAD	0.000229	73
RPS6KA2	LEPREL1	0.6917	co	1	306	000000010000000000000000000010010100000000000000000010000100000000000000000100000100000100010000100010000010000000010000001000000000000000000100000000000000000000000001000000000000000008000100000000001000000000000100000001000001000000000000000010100000110000010100000000000000101000000100100110000000000000000000000000100000000000000000000100000000000010000000000000000000000000000000000070010000000…	TCGA-NORMAL	0.0003529	74
CDCA8	ORC1	0.7107	co	2	700	101111001000100110111001010001101011010011101101011101010001010010100010000001101011000011101010000100001010101100101110001111100011001101101080100111011011010111010011000110010101110109011010011011110100011001011011001101101000101011101111111100001111001100001001010000011110001010110011810001110010001010011100011011000001000001111010111001010011001001010000011010110010100110101101100001810110100…	TCGA-LUSC	0.0005608	74
CEP55	CDCA8	0.8908	co	1	633	010000110000111001000110101110010000000100010010100010001010101101011111111110010100110100010100111011100001110000010000110000011100110010010181011000100100001000100000100001001000001009100100000100001011100110100100010000000101010100010000000011110000110010110110100110100000100101000100901010000101110101000011000000111110111100000100000100001100110110101110100101001001011001000010011000001001011…	GTEx_normal	0.000985	74
DLGAP5	KIF2C	0.8904	co	1	595	000000110000011001000010101010010000000100010010100010001010101101011001011110010100100100810100111010100001000000010081110000011100110010010101011000100100001000100000100001100010001019000000000100001000100110100100010000000101010100010000000011000000110010110110100110100000100101000100901010000101100100000011000000110010000100000100000100001100110110101110100101001001011801000010011000001000011…	GTEx_normal	0.0002592	74
SEMA6A	FOXF1	0.6842	co	2	452	111001111111000001111111011010111111001110011110118001111101111111101101111001111110111101018111111111080110110110101801011111111111011811818110101111001001111111111110001110101111110109011111001111010100011110110100118111101010111110111101810001010100010111118110110111181111111111101011001111011111111100811110111101101011111110001111111101111101101101110111001001111111810011010110111111110110011…	TCGA-LUAD	1.833e-06	74
PRX	S100B	0.6867	co	1	83	100100000100010700000010000007100000008100000000000000000000100000010000010010000000000100800000000010000000000000000000000000000000100000001000000000000000010000017000000011000000000009100000000000000000000010000000018100000000000000010000000000000000000000110000100001000000000100100000000008000107010001000000000080000000000000000100000000000010000000000100100000000000000000000000001000000000000…	TCGA-LUAD	0.0008554	75
PIP5K1B	HDAC1	-0.6912	co	1	337	000000000000000000000000000000000000000000080000000010000000001000000000000100000000000000000000000000000000000000010000000000010000000000000100000000000000000000100000000000000000000009000008000000000001000000000000010000000000000000000000900000000000100100000000000000000000100000000110800000000000000000000000000000000000000000000000000100000000000110000000000000000000010000000000010000100000000…	TCGA-NORMAL	0.0003529	75
S100A14	VEPH1	0.6905	co	1	297	000070000000000000000000001000000000000000000000000010000000100001000000000110000100000000710000000000000000000000000000000000000000000000017000000000000000700000000101000000000000000019000000000000000000000000007000000000000000000000000000000010000000007000000100000000000001000000000100900000000100000000000070000000000010000000000000000000000000000010000100000000070001700700007000001070000000000…	TCGA-NORMAL	5.941e-05	75
LIMS2	VCP	0.7102	co	1	83	000000100000000000000000008080000000101000000000008000000000000000000000000000000001000000107000000000001000001000000010007000000000000000108001000000000000000000000000000000010000000009000000000000000000001000000000000000000010000000000000000000000000000000007010000000000000000000000000700000000000000001000000000000010000000000000000070000000000000000000001100000000000000000000000000001000001000…	TCGA-LUSC	0.0005608	75
CEP55	ASPM	0.8904	co	1	608	000000110000011001000010001110010000000000010010100010001010101101011101011110000100110100010100111010100001100001010000110000011100110010010101011000100100001000100000101001001100001009100000000100001001100010100100010000000101010100010000000011010000110010110100100110100000100101000100901010000101010100000011000000110110101100000100000100001100110110101110000101001001011001080010011000001000011…	GTEx_normal	0.000985	75
TOP2A	ANLN	0.8889	co	1	551	000000110000011001000010001010010000000000010080100010001010101101011001011110000000100100010100011000100001000000010000010000001100010010010100011000100000001000100000100001080000001009000000000100001000100010000100000000000101010100010000000011000000100000010180100110100000100101080100901010000001100100000001000000010000000100000100000100001100010110100110000101000001011001000810011000001000081…	GTEx_normal	6.028e-05	76
S1PR1	THBD	0.6858	co	1	668	111111111111010111101111011111111111001111111101111101111111111010011110111011101111111111110111110111011110110111101111111111111011111111111111111011010111101111111110111111101111111109111111101111111110111101111111011111111111110111111101011101111110010111101111111011111111101111011011111111101111111011111111111111111111110111011111111111111111111001111111111001111110011111111111111111101111111…	TCGA-LUAD	0.0008554	76
ARHGEF6	IFI16	0.6836	co	1	76	000010000000000710001000000010000000000001100000011000000000001000000170001000010000000010101000010000000001000100100070001000070000010000000000000000010000000000100000000010000000000009000000100000000000000000001000000000000000000001001001111000000000000001001010007100010001100000007001000000000000107100000000000010000001000000000000000100000007000000100000000000010000100100000000000010000000100…	TCGA-LUAD	2.635e-07	76
OLFML1	C1QTNF6	0.7087	co	1	115	000001000000100100000000010000000000010000001000000000000000000000000000000000100000000010001010000000000100000000000080000000000000000000100000100100001000000000000000000000010000000009000000000000100000000000000000000000000000000001000010000100000001000010000001000000000000000000001000700001000010000000000000000000000000000000100000100000000001000000100000011000000010000000000000000000000000000…	TCGA-LUSC	0.0005608	76
CGNL1	GRAMD2	0.688	co	1	337	000000000000000801000000000000000000000000000000000010000000001001000001100100000000000080000000008000000000000000000000000000000000000000000000000000000000000000000000000070000000001009000000000000000001100000000000000000000001000000000000010010001000007000000100000000000000000000000100800000000100000000000000000000000000000000000000000000000000010010000100000000000000001000000000000000000000000…	TCGA-NORMAL	0.0003529	76
RRM2	MYBL2	0.8903	co	1	603	000000110100011001000000101010010000001100010010100010001010101101011101111110010100110100010100111010100001100000110001110000011100110010010101011000100100001000100000101001100000001009100100000100001000100000000100110000000101010100010000000011000000110000110110100111100000111101000100801010000101100101000011001000010100110100000100000100001100010110101110100101801101011001080010011100000000011…	GTEx_normal	0.000985	76
ARHGEF15	CYYR1	0.706	co	2	178	100000000000000100000010001000000000101000000100000000000000000000000000000000000000000010107010000000010000000000000000000000000000000100008001000000000100010000000000000010000000000009000000000000000000000000000000000000000010000000000000001000000000000000001100000000000000000010000000800000100100000001000000000000010000000101100000000010000000000000000000100000000000000000000000000000000010000…	TCGA-LUSC	3.211e-05	77
GHR	CD93	0.6837	co	1	647	111111111111111110111111110111111111801101111110111100011101111111111111111001111011111111018111111101111111111111101111111111111111111111111111111111111111111111110110111101111111111119111111111111111100111111110110011111111111811111111111110111111111110111111111111110111111111101101011011111111111111111111110111111111111110110111111011101111111111111111111111101111111111011111111011011110111111…	TCGA-LUAD	5.334e-05	77
SHE	TEK	0.7076	co	1	693	101101111010100100100000010101001110110011111000010100111001110010110000011010111001001010001100100000011101000101001100100110000011000100001000000111011010110010000010011810110010110109011110001101110100001011011011001001111010101011000010111100000111000100110011000000000010000101110011011101100000101000011100111110001000111101111001111010000101001101000000111000110010100111101100100011100111100…	TCGA-LUSC	0.0005608	77
C2	KCNJ15	0.6854	co	1	319	000000000000010000000000000100000000000000000000100010000000000000001000100101000000010100700000000000000000000000010070000000100000000000000000000000000000000000000001000000000000000009000001000000700010000000000100100000000001000000000000800010000000100000000000000000000000000000007100900010000000000000000000000001000110000000000000000000000000100000100101000000000000011000000000001000000000008…	TCGA-NORMAL	0.0003529	77
CEP55	NCAPG	0.8898	co	1	628	000000110000011001000110101110010000000000010018100010001010101101011111011110010100111100010100111011100001110001110000110000011100110010010101011000100100001000100100101001001000001009100101000100001001100110100100010000000101010100010000000011110000110010110100100110100001100101000110901010000101110100000011000000110110101100000100000100001100110110101110100101001001011001010010011000001000011…	GTEx_normal	0.000985	77
FGFR2	CDC20	-0.6768	co	1	480	111011101111111101111111111111100101101100111110110001110111111111110111101101111111111100001101110111101111110111111101111111111111111111110001111111101111101011110111111101111111101019111111700111101111110111111111110110111011111001011110010101111111111011111111117110111111111101171011711111011101110111111111111071101110111110111001001101111111107011111100111111111101100111110111111110011111111…	TCGA-LUAD	2.635e-07	78
CYP51A1	RRAS	-0.6849	co	1	288	000000000000000000000000000000000000000000000000000000000000000000000000000000000000000000000000000000000000000000000080000000000000000000000000000000000000000000000000000000000000000009000000000000000000000000000000001000000000000000000000000000000000000000000000000000000000000000000000701000000000100008000000000000000000000000000000000000000000000000007000000001000000000000000000000000000000000…	TCGA-NORMAL	0.0003529	78
MAGEA1	C11orf86	-0.6839	co	1	81	099990999909009090999991999999091999909909900999999199909099999919199909999991999909999199911999999119900909999990990909990909909999999999199999091999909099999109091099919999909901909909990099999999991119999991099999999991999991999990099900999099991919999099990009909199919999199999999909099990190909199909999999999019900919919999109910999990999999990999999911900999990990999009011999019990999010099…	TCGA-LUAD	0.0008554	78
HJURP	BUB1B	0.8888	co	1	640	010010110000011001000110101111110001000100010010101010001010101101011001111110010100110100010101111110100001000000110000110000011100110010010101011000100100001000100110101001001100001019100100000100001001100110100100110010000101010100010000010011110000110000110110100111100001100101000100101010000101100100000011100000110010100100000100000100101100110110101110100101001001011001010000011000001000011…	GTEx_normal	0.000985	78
RHOJ	DLC1	0.707	co	2	676	101101011011110110111101010000001001100010111001010100011011010010101110000001100011100000008001000000081100101111101000100110001011000001000010100111000100011111010110110011110001010007001010100100810100011101101011001001011000101011110010101101001011001110001011011010101010000110110011011011111010110011011101111111001001010011111001111001000101001000000001011000101000100110111011000001110110110…	TCGA-LUSC	0.0005608	78
GIMAP7	NRN1	0.6802	co	1	536	010011111110101111111001111110110100101101010110100101111111111111111111111011011101101101010100111011011111001010101011101111110100111101011101011101101111110010110110011110111111001009011111111111010000111101110110101010011110010111111111101100111111010101011101111111111111111111111011011111110110101111111110101110110110111100110000101110010000011101111110111000011010111011101111111111110111111…	TCGA-LUAD	0.000229	79
LAMP3	DUOX1	0.6844	co	1	282	000000000000000000000000000000000000000000000000000010000000000000000000000100000000000000007000000000000000000000010070000000000007000000008000000000000000000080000000001070000000001009000000700000801000000000000000000000000000000000000000000010000000100000000800000000000000000000000100900010700000000000000700000000000000000000000000000000000000000110000000000000000000800800070000700000000000000…	TCGA-NORMAL	0.0003529	79
SPRR2B	LCE3D	0.7017	co	1	393	999999999911999999999999999999999999999999999999999999999999999999999999999999991999199999999999999999999999991991991999999919999999999999999919999991999999919999991999999999999999999999999999999999999999999999999999999999999999999999999919999999999991999999999999999999999999999999999999999999999999999999999999999999999999999999999999999919999999999999999999999999999999999999999999999999999999999…	TCGA-LUSC	1.579e-08	79
C18orf8	TAL1	0.7019	co	1	54	000000000000000000000000000000000000000000000000000000000000000000000000000000000000000010001000000000010000000000000100000007000000000000000000000700000000000000000000000000100000000009000000000000800000000000000000000000000000800000100000000000000000000000000000000000000000000000000000000001000000000000000000000000000000700000000000000000000010000000000001000070000000000000000070000000000000000…	TCGA-LUSC	1.393e-07	79
ST3GAL5	PIP5K1B	0.684	co	1	308	000000000000000000000000000000000000000000080000000010001000001000000000000100000000000000000000000000000000000000010000000000010000000000000000000000000000000000100001000000000000000009000008000000001001000000000000000000000100000000000000900000000000100010000010000010000000000000000000001010000000000000000000000000000000000000000000000100000100000000000000000000000000000000000000000000000000000…	TCGA-NORMAL	5.941e-05	79
BUB1	GYLTL1B	-0.6806	co	1	185	100100001111100000010110101101100001100000001000000000000010000000100000000100110001000100100000800000010000100001001080100000000010011000000001000111001000000010000101111100011110000019101010000000000110000000000010011010010000101000000010100000110000000011000010000000100001011000000000910100010010000000100110101000001000111100110001100010100000000000001000100001000000000000100100000000000000000…	TCGA-LUAD	0.0008554	79
C1orf192	LRRC46	0.8886	co	1	262	001000000000010000100000000000000000010001000000000000000010010001011001010070000000010800000000001000800000010001100001000080001000000001000000000001000007100000000100001000000000000009810000001000000000000010000700000000001000000008010000000080010000000000000000000010100701000010000000901070000000100000000000100000001810000000001100000010100100100710000000000700000000000000000000011000000000000…	GTEx_normal	0.000985	79
RRM2	TPX2	0.8885	co	1	553	000000110100011001000000001010010000000000010010100010001010101101011001011110080100100100010100111000100001000000810080010000011100010010010101011000100100001000100000100001000000001009000100000000001000100000000100010000000101010100010000000011010000110000110100100110100000100101000100801010000101000100000011000000010010000100000100000100001100010110101110100101001001011001080010011000001000011…	GTEx_normal	0.0002592	79
RAD51AP1	NCAPD2	0.7045	co	1	625	001100001010100110101000010100000110110011101001010101010101000010100000000001101001000011108011000000001110001111001010001111100011000001100010100111008000010100000001010180010000110019011010001011110100001001010011000101110000101011001101101100001111001000000000011000001110000000010000010001111010001010011100101111000000000011010000110011100001001000010001018010110010100100101100100001110111100…	TCGA-LUSC	0.0001439	79
CDCA5	NCAPG	0.8885	co	1	631	010000110100011001000110101110110000001100010018100010001010101101011011011110000100111100010100111011100001110001110080110000011100110010010101011000100100001000100000101001101010001019100101000100001001100010100100010010000101010100010000000011110000110001110110100110100000100101000111901110000101100101100011000000110110100100000100000100001100010110101110100101001101011001010010011000001001011…	GTEx_normal	0.000985	80
JAM2	JAM3	0.7044	co	3	114	000000000000000000000000000000000010000000000001010000000000000000010000000000000001000000000000000010000000000000000000000000000000000000001010000000000000001100000000000001000000000009000000000000000000000000001001001000000000000000000000000000000000007000000000001000000000000000000001700000101000000000000000000011010000000000000010010000000000000000000001000000000000100100001000000001100001000…	TCGA-LUSC	0.0001439	80
TCF21	ATOH8	0.6717	co	2	168	000010110000100000100100001010110000010100001011110000000100001111000810001000010010010001901011010000010001000000000081000001110100010100101001010000010110000100100100000000010100100009110101100000000010000000001000100100000000000000011001901000100001000101000010101001100011100000001010001100100000100110000001000011000100000000000010000001001011000001000000010001000011000001000010010111000000001…	TCGA-LUAD	3.122e-08	80
RHOBTB2	SYT15	0.6829	co	1	336	000000100000000000000000000100000000000000000000000010000000100000001000000100000000000000000000000000100000000000010000000000000000010000000000000000010000000000001001001000000000000009000000800000001010000000000000000000000001000000000000000010000000100000000100000000000001000000000100800010000000000100000000000000000000000000000000000000000000000000100080000010000000001000000000000000001000000…	TCGA-NORMAL	0.0003529	80
RHOJ	NRN1	0.6762	co	2	566	011111111110101111111101111010110101101101011110100100011111111111101111111001111101101101010100111001181111011010101011101111111110011101011101011111101110011011110110111101111111111107011111111111111000111101010110111011011110011111111111111100011111010101011101111111111011111101111011011111110010111111111110101110110110111100111010101100010000111101111111111001011110101011101011011111110111111…	TCGA-LUAD	0.0008554	80
NLRP11	TM4SF5	-0.6758	co	1	62	999990999999999090990999999990990999919999999919119799909999999999999999919919979999999999999999999999999709991191999999979999990900999999199909799990099999991999991099019999999999990919999999999999909999099999999909997199999999999999099099999999999999999199999910991971999999991991999990099991091099999999999909999999909999909919919919999999999799909999199991990991999999991199990999999091999999999…	TCGA-LUAD	0.0008554	81
CDH6	KANK3	0.7035	co	1	69	000000000000000000000000000000000000079000000000000000000010000000010000010000000000000000000000000000000000000000000100000000000000000000000000000000000100010000000000070070000000000009000000000000010000000000001007000000000000000000000000001000000000000000000000000000000000000100000000000000000000000008000000000000000000000000000000000070000000000000000000100000000000000100000010000000000000000…	TCGA-LUSC	0.0001439	81
LRRC48	CCDC74A	0.8879	co	1	235	000000000000010000000000000000000000000000000000000000000000000001001001010070000000010000000000001000000800000000100001000000007000000000000000000000000000000000000100001000000000000009000000000000000000000000000000000000000000000000010000000000000000000000000000000010000000000000000000900010000000000000000700100000010011000000001100000000100100100710000000010700000000000000000000011000000000000…	GTEx_normal	6.028e-05	81
GIP	CGB	-0.6758	co	1	41	999999907999990999999990909909999999999990999999999999909999999999919999999999099999999919999999999999991919999999999199999919999999999999999999999109999999999999909991991999991990099009999999999999999999909999990919999991999991999919999999199999999990999909999999909999999999909099999991999990999999199999099999999999999990999999911999919999999997999999999991919999900990999999999090979999999999999…	TCGA-LUAD	0.0008554	81
AURKB	CDCA8	0.8884	co	1	600	000000110110011001000000101010010000000100010010100010001010101101011101111110010100100100010100111010100001000000010000110000001100110010010181011000100000001000100000100001000000001000000100000000001001100000100100110010000101010100010000000011100000110000110110100111100000100101000100801010000101100101000011000000010000100100000100000100001100010110101110100101001101011001000000011000001001011…	GTEx_normal	0.000985	81
RAMP3	NRN1	0.6752	co	1	535	111111111110101111111101111110110101807101010110100100111111111111011111111011111100101101810100111001011111011010101011101101110100111101011101001111101111010011111110011100111111111109011111111111010010101101110110101010011110011111111111101100111111010101010101111111111011111110111011001111110110101110111110101110110100111100111010101100010000111101111111811001011010111011101111111110110111111…	TCGA-LUAD	0.000229	81
KANK2	KIAA0430	0.6796	co	1	337	000000000000000000000000000000000000000000000000800010000000000000010000000000000100000000000000000000000000000000000700000000000000000000000000100000000000000000000000000000000000000009000000000000000001000000000000000000000000000000000000000000000000000000000000000070000000000000000000000000000000000000000000000000000000000000000700000000000000000000000000800000000000000000000000000000000000000…	TCGA-NORMAL	0.0003529	81
PRR11	KLF4	-0.6722	co	1	321	000000110101010001010110001011110001001101000010101000101010101101011010000101010110111100111000111110000000100000100071111001011101111110017100011000110100101100101100100000000101001109000000100000000000110110100101110010000011000100010000010001011110110010111011111110011001101111007100700000001101100100100011100001110111111100101110000100011000110010100111100101011111011001010010011110000001011…	TCGA-LUAD	1.071e-05	81
KDM5B	KIAA0247	0.6781	co	1	309	000000000000000700000000000000000000000000000000000810000000100000000000000000000000000000007000000000000000000000000000000000000000000000000000000000000000000000000000100000000000000007000000000000000000000000000000000000000000000000000000000010000000000000807000000000000000000000007100800000000008000000000000001000000000000000000000000000000007000000001000000000000000000000000000000000000008000…	TCGA-NORMAL	0.0003529	82
ABCA3	DHCR24	0.888	co	1	433	010000010100001001000000100000110000001000010000000010000000100000008001100100001000000000010110101000100000000000010000000001010100010000000100000001010000000000001001101000001000081709000000010000001711000001000000000000000001000000000000000110101100100000010100100000000008100000000100900010700001000110000000000000010110000770000010000000000100010110100000000118000000001700000000001000001000001…	GTEx_normal	0.000985	82
CMSS1	KIAA1524	0.7033	co	1	704	101101001010100110101000010100001111110001100101010101010001000000100000000001101001000011101010000000011110011100001110000110100011000000101010100111011010010101010110000110010001110119001010110011110110011000011011001101111000101011100011101100001111001100001001010000011110000010010011010001101010011011111000011111001001000011111001101011000011001001010000011010110000100110100100100001110111100…	TCGA-LUSC	0.0001439	82
C17orf98	MSGN1	-0.6956	co	1	44	999999999999999999999999099999999999999999999999999999999999999999999999999999999999999999999999999999999999999999999999999999999999990999999999999999999999999999999990999999999999999999999999999999999999999999999999999999999999999999999999999999999999999999999999999999999999999999999999999999999999999999999999999999999999999999999999099999999999999999999999999999999999999999999999999999999999909…	TCGA-LUSC	1.66e-13	82
CRTAC1	ACOXL	0.8878	co	1	415	000000100000001001000000100110108000000010000000000010001100001010000001100100080000000000010110008001100000000000019000000000100100000000080000001000010000000000100001101000000000000019000000000000991001000000000000009000000101000000000100000110010000100000000000000000000000100980000100901000000000100010000900000000000810000000000010000100001000009110010810009018000000001000000900001000001000000…	GTEx_normal	6.028e-05	82
HJURP	TOP2A	0.888	co	1	621	010010110000011001000110101111110001000100010010101010001010101101011011011110010100100100010100111110100001000000110000110000011100110010010101011000100000001000100110101001000000001019100100000100001000100010100100010010000101010100010000000011010000110000110110100110100001100101000100901010000101100100000011000000110010100100000100000100001100010110101110100101001001011001010000011000001000011…	GTEx_normal	0.000985	82
LIMS2	POP5	0.7033	co	1	132	100000000000100110000000000000000000801000001801010700007000000000000000000000000008000000001000000000000000000100000010000000000000118000808001000100008000000000000000000010080070000009000700108000100000000000000001000000000010000000000000100000001011000000001000001000000070000000000000700001700000000008000700000000000100010000110000800000000001000007000000101000000000000000000000000000000108700…	TCGA-LUSC	0.0001439	82
GPR128	ANKS4B	-0.6693	co	1	38	199991990999999009099919999999999999999909910999919199999999999999909991909999919999999999999909999999999999991991999099919999999990999999998999999999999999991999999999910999999919999099999900990199990999999099991999991990199199999999199909999990999999999999999999999919999999999090099999991901199909999999099999999991999999999999919999999999999191999999999990001999999999199999999919999999909999999…	TCGA-LUAD	2.171e-10	82
ESAM	KDR	0.7029	co	1	640	100101101110100110100000008010110011011000100010010100010000011010010111100010110110100011000110010001081101001100001010000011010001011100000010101000101100010110018100010111110010101109001010101010110100000100011010000100110000101010001110101000001011000100001810101000000010100111010010110001100000110010001100000110001008011101110100100101000011101100000101810000000000100101110081010010100100100…	TCGA-LUSC	0.0001439	83
SRPK1	SLC30A7	0.6777	co	1	327	000000000000000000000000000000000000700000070000000010000000000000010000000010000007000000000000000000000000000000010080000000080000000000017007000000000000000000000000000000000000000008000000000000000000800000000000000000000000000000000000000010000000000000000070000000000000000000000100700000000000000007000000000000070000000000000000000000000000000010800000700100000000000000000000000000000000000…	TCGA-NORMAL	0.0003529	83
UBE2C	KIF2C	0.8877	co	1	598	000000110100011001000010181110110000000000010010100010001010101101011101111110000100100100010100111011100001100000010080010080001100110010010101011000100100001010100000100001100010001009000100000100001000100000100100110000000101810100010000000011000000110000110110101110100000100101000100101110000101100100000011000000110000000100000100000100001100010100101110100101001001111001000010011100001000011…	GTEx_normal	0.000985	83
MCC	CD93	0.6716	co	1	537	111101101101011111111111111111111111101111110101111100111111011110110111111001111111011011007111110101110111100011101101011111181111011101101110111111011110101111111111111111101111111117111011111111001011111111011111111111111111111111111101111011111110110111001011111110110110101011111011811111811101111110110110111111101111011010111011111101111118111011111111011101111111111111111111111111111111111…	TCGA-LUAD	1.833e-06	83
LIMS2	ZCRB1	-0.6723	co	1	43	000000010000000000000000000000001000100000000001010000000000000000000000000000000001000000000000000000000000000000000010000000000000000000101001000000000000000000000000000000010000000009000000000000100000070000000000000000000010700000000001070000000000000000000000000000000000000000000000700000100000000001000000001000010000000000000000000000000000000000000000100000000000000000000000000070000101000…	TCGA-LUAD	0.0008554	83
KIF11	CDC20	0.8875	co	1	618	000000111000011001000110101010110000000100010010100010001010101101011001111110010100100100010100111010100001100000110000110000001100111010010101011000100100001000100800100001000000001009100100000100001001100110100100010010000101010100010000000011110000110011110110100110100001100101000100801010000101100100000011000000111010111100000101000100001100110110101110100101001001011001010010011000001000011…	GTEx_normal	0.000985	84
ADAM23	TXN	0.6977	co	1	394	000000000000000000800000000000000010000000001000000000000000008000000000000000000000000080100000000000000000000000000000000000080000000000000000000000000000000000000000000000000000000009000080000000000000000000001000000000000000000000000090001000000000001000000000000000000000009000000000700000000000000000000000000000000000000000000010000010000000000000000000000000000000000000000000080000800000000…	TCGA-LUSC	1.393e-07	84
LIMS2	ESR1	0.6718	co	1	85	010000000000000100000000000000000001101000100100000000000001100000000000000000001001000000000000000000010010100001000100000000000000001010808001000000000070001000000000000700000000000009100000000001000000010007000000000000000070000000000000107000000101000000010101000000000010000100007000000000000111010008010010000000010000001000010000000000001000000001100000100000000700000000100000000100000011000…	TCGA-LUAD	0.000229	84
PRUNE2	RAMP2	0.6714	co	1	108	000000100000000010000000000000000010101000000001010000007010000011100000000000010001000080001001010100010010100100000100000010101000000000101017010000000000001000000000000100000000000009000000000000010000000000001000000000000000000100110001000000000000000000000100001000010000001100100000700000110010000101001000000000070000001010010000110000000010100100010001100000000000101001001000000010800001000…	TCGA-LUAD	1.833e-06	84
SPHKAP	KBTBD13	-0.677	co	1	44	999999999999999999999999099999999999999999999999999909999999999999999999999999999099999999199999999999999999999999919990999999999999999999999999999999999999999999999999999999999999999999999999999999999999999999999999999999999999999999999999999999999999999999999999999999999999999999999997999999999999999999999999999999909999999999999199999999999999999999999999999999999999909999999999999999999999999…	TCGA-NORMAL	0.0003529	84
GTSE1	CEP55	0.8875	co	1	617	010000110000011001000010001010010000000000010010100010001010101101011001011110010100110100010110111011100001110001010000110000011100111010010101011000100100001000100000100001101100001009100100000100001001100110100100010000000101010100010001000011010000110000110110100110100001100101000100901010000101110101000011000000110110101100000100000100001100110110101110100101001001011001000010011000001000011…	GTEx_normal	0.000985	84
STOX2	FAXC	0.6712	co	1	57	700100000001000070000101000001001000101100000100007000000000100000780000000000001000000000009000000000010000000000001000000101000000000000700000000000000000000001090000070110000000000009000000000007000000000010007010000071000000000000000000000000000100000000007001000100007000000000000000000000700100070001000700070000000000070010007000100000000000000000000000000000000170000110777100000100000007000…	TCGA-LUAD	1.833e-06	85
STARD8	GPR116	0.7	co	1	638	100101001010100110111000010001000011100000101000010100000001000000100010001000100001000011100000000100011100001100001010111010000011000001101010100110001000010110010000010110010011010109001010100100110100000000001011001000011000101011110010101000001111000100000000001000100010000101000011010001001000110000001101101011001000011001111000011001000001001000000000011000100000000110110011100011100000100…	TCGA-LUSC	3.211e-05	85
PAICS	HSPA9	0.6761	co	1	317	000000000000000000000000000000000870000000000000000010000000800000000000000000000000000000000000000000000000000000010000000000000000000000000000000000000000000700000000000000000000000009000000700000000800000000000000000000000101000000000000000010000000000000000700000000000000000001000000700010000000000000000000000000010000000000000100000000000000000000800000000108000080000000000000000000000000000…	TCGA-NORMAL	0.0003529	85
KIF11	NCAPH	0.8874	co	1	624	000000110000011001010010001010010000000000010010101010101010101101011011011110010100110100010100111010100001100010110001110000011100111010010101011000100100001000100100100001001100001009100100100100001001100110100100011000000101010100010000000011110000110000110110100110100001100101000100801010000101110100000011000000110010001100000100000100001100110110101110100101001101011001010000011000001000011…	GTEx_normal	0.000985	85
ASPM	CCNB2	0.8874	co	1	606	000000110100011001000010101110010000000100010010100010101010101101011001011110000100100100018100111010100001000001110000110000011100110010010100011000100100001000100000100001001000001009100000000100001000100010100100010000000101010100010000000011010000110010110110100111100000100101000100101010000101100100000011000000110110100100000100000100001100010110101110000101001001011001010010011000001000011…	GTEx_normal	0.000985	85
FOXE1	C19orf69	0.6654	co	1	47	900900010090900000000910199900990099909000099999999099900990909901910090999099999090110990000990009900910909199991900090999001990909099099009009090919990909900990009100991909990090919909009990999900900099090190999009009900999090990909919990009000090009009000090999909909991990900909990999799119909190000990009900999199999191090001900000019009991099900000999019909099000009999009909019090999090909900…	TCGA-LUAD	2.965e-09	86
GYS2	NPSR1	-0.7005	co	1	50	999999990999999799090999099099000999999999097999999999909000909010999091919999999999099999909999999999997909999999099911999099099900099909999999999099919990990999999999999999999909199099979999999199909999999199099999999979999199999909099999990090990099999990099999999079099919999999909990701990999999991099999909999999999999990979770099990999999191909999099990909999999999999999999990909999709999909…	TCGA-LUSC	0.0005608	86
ASPM	NCAPG	0.8868	co	1	616	000000110100011001000110101110010000000100010018100010101010101101011001011110000100100100010100111010100001100001110001110000011100110010010100011000100100000000100000101001001000001019100000000100001001100010100100010000000101010100010000000011110000110010110100100111100001100101000110901010000101110100000001000000110010100100000100000100001100010110101110000101001001011001010010011000001000011…	GTEx_normal	0.000985	86
PTRF	MS4A4A	-0.6755	co	1	356	000000000000000000000000000100000000000000000000000011000000000000010000000100100000000000007000000010000000000000000000000000000000000000000000000000000000000000000000000000000000000009010000000000000000000000000000000000000000000008000000000010000000000000000000000000000000000000000100000000000000000000000001000000000000000000000000000000000000000010000000000000000000000000000000000000000000000…	TCGA-NORMAL	0.0003529	86
MELK	BUB1B	0.886	co	1	637	010000110000011001000010101011110001000100010010101010001010101101011101111110010100101100010100111111100001110000110000110000011100110010010100011000100100001000101000101001001100001019100101000100001001100110000100010000000101110100010000010011110000110000110110100111100000101101000100801010000101100100000011000000110010010100000111000100001100010110100110100101001111011001010010011000001000011…	GTEx_normal	0.000985	87
MYBL2	UBE2C	0.8858	co	1	592	000000110100011001000010101010110000000000010010100010001010101101011101011110010100110100010100111010100001100000010000010000011100110010010101011000100100001000100000101001100000001009000100000100001000100000000100110000000101010100010000000011000000110000110110100111100000110101000100101110000101100101000011000000110000100100000100000100001100010100101110100101001001011001000000011100001000011…	GTEx_normal	0.0002592	87
KCNK10	C11orf86	0.6683	co	1	35	999999199990909990909999999999099990909999919990999091990900999099099990900090919000990999990990009999999909099990999999019919090909909998999999999910009999999899090079919999999011990999999090999009990999990009999999001919909199990999001099999009090909999999909090999900999999999999900999901911010900999999990909091999909909999999919909999090999199999999909090909999909999919909991909909990900999999…	TCGA-LUAD	2.635e-07	87
PIP5K1B	RETSAT	0.6742	co	1	234	000000000000000000000000000000800000000000070000000000001000001000000008000100000000000000700000000000000000000000000070000000000000000000000000000000000000000000800000000000000070000009000008000700000000000000000000000000080800000000000000900000000000100000000000000000000000000700000000707000000000000000008000000000000000000000000000000100000800000000000000800000000000000000000000000000000000000…	TCGA-NORMAL	5.941e-05	87
C2	LEPREL1	0.6743	co	1	317	000000000000000000000000000010010000000001000000000010000000000000000000000100000000000100700000000010000000000000000000000000000000000000000000000000000000000010000001000000000000000019000000000000701001000000000100000000000101000000000000000010000010100100000100010000000000100000007000900010000000000000000000000000000100000000000000000110000000000010000000000000000000000000000000001070000000008…	TCGA-NORMAL	0.0003529	87
HJURP	KIF2C	0.886	co	1	629	000010110100011001000110101111110000000100010010101010001010101101011011111110010100110100010100111111100001100000110080110000011100110010010101011000100100001000100100101001000010001019100100000100001001100010100100110010000101010100010000000011010000110000110110100110100001100101000100101010000101100100000011000000110110100100000100000100001100110110101110100101001001011001010010011000801000011…	GTEx_normal	0.000985	87
PMP2	ZIC4	-0.6974	co	1	92	999999999999999999999999999999999999999999999999999999999919999999999999999999999999999999999999999999999999999999999999999999991999999919999999999999999999999999999999999909999999999909999999999999999999999099999999999999999999999999999999999999990999999999999999999999999999999199999999999999999999999999999999999099999999999999999999999999999999999999999999199119990999999999999999999999999999999…	TCGA-LUSC	3.211e-05	87
ARHGAP11B	BUB1B	0.6986	co	2	687	101111000111000110111101010000101110111011101101010101010101010000100010000001101011000011101000000001010110001101001011001111000011001100101010100110011011010111010001010100010011110109011011110011110110011001011011101100111000101011101111111100001111001000000001000000011110010010011011000001111010001011111100000011001101000111111000111001000011001001010001111010110000100110101101100110100111100…	TCGA-LUSC	0.0005608	88
GPR116	CXorf36	0.6964	co	1	602	100001001010000110111000000000000011000000101000010100000001000000110010000000110001000011008000000100011100001100001010001010000011000001100010100110001000010110010000010010010001010109001010100100110100000000001011001000010000101011000010101000001111000100000000001000100010000101000010710001001000110000000100100011001000010001111000011001000001001000000000011000100000000110110001000011100000100…	TCGA-LUSC	3.211e-05	88
MYCT1	NRN1	0.67	co	2	578	111111111110111111111101111010110101101101011110100100111111111111111111111011111101101181010100111011081111011010101011101111110110111101018101001111101110111011110111111111111011111107011111111111011000111111010110111011011111011111111111101100011111010101011101111111111111111111111011011111110010111111111110111110110110111100111010101100010000111001111111111001011110111011101011011111110111111…	TCGA-LUAD	0.0008554	88
PLLP	KLF13	0.6738	co	1	305	000000000100000000000000000000000000000000080000000010001000000001000001010000000000000000000000001000000000000000010770000000000000000000000000000000000000000000000000000070000010000009000000000100001000000000000000000000000000000007000000000000000000008000000000000000000000000000000100700010000000000000000000000000000000000000000000000000000000010000000100007000000000000000000000001000000080000…	TCGA-NORMAL	0.0003529	88
CEP55	RRM2	0.8857	co	1	579	000000110000011001000010001010010000000000010010100010001010101101011101011110010100100100010100111001100001100000810000110000011100010010010101011000100100001000100000100001000000001009000100000000001001100010800100010000000101010100010000000011010000110000110100100110100000100101000100901010000101000100000011000000010110000100000100000100001100110110101110100101001001011001080010011000001000011…	GTEx_normal	0.0002592	88
RHOJ	GPR116	0.6956	co	1	585	100001001010100110111000000000000011000000101000010100000001000000100010000000110001000011000000000100081100001100001010001010000011000001100010100110001100010110010000010010010001010109001010100000810100000000001011001000010000101011000010101000001111000100001000001000100010000100000010010001000000110000000101100011001000010001111000011001000001001000000000011000100000000110110011000011100000100…	TCGA-LUSC	6.175e-06	88
SH2D3C	MAP6D1	-0.6646	co	2	50	000000000000000100000000001000000000001000000000000000000010100000000010000000000000000100011000000000010101100000000100000000010000010000001001000000000000010000000000010010000000000009000000000000000000000000000100001000000010000000000000000000000000000000000000000000010000000000100000000001000000000000000000001000000100000000000000000000000000000000000000100000000000000000000000000110000001000…	TCGA-LUAD	3.122e-08	88
IFITM5	SYT14	0.694	co	1	66	999990999999999990997999999099999909099909999999999999909990999999999199999999999999999999999999099999900909990999999099099999909999979999799999099099999999999909999999990999999999999999999999999909099099989909999999990999999999909909099991999099990709999909999079009909999999999999997990799990099009999100999999999990999099919991999090909999999991999999999909000909990999999991999999999997009997999…	TCGA-LUSC	1.393e-07	89
ABCA3	ALPL	0.8856	co	1	438	000000000000001000000000100100110000000100000000100010000100001000008000010100001000001800000000011001100000000000018080800000000100000000000000000001010000000000000001101000001110110009000000010100001011100000010000100000000101000000001100000110110000100000000100100011000008100000000100900010080101000010000000000000010080000000000010000000000000000110010000000110000000010000000010000100001000001…	GTEx_normal	0.000985	89
TOP2A	KIF2C	0.8852	co	1	583	000000110000011001000000101010010000000100010010100010001010101101011001011110000100100100010100011010100001000000010080010000001100110010010101011000100100001000100000100001000010001009000000000100001000100010100100010000000101010100010000000011000000110000110110100110100000100101000100901010000101100100000011000000010000000100000100000100001100010110101110100101000001011001000010011000001000011…	GTEx_normal	0.0002592	89
ADRA1A	INA	-0.6683	co	1	104	990909199900110009010900099999119001090900919990999091000991909199901900991009911099099090919199099001099919909019101100999990000090909999999999090991100999999090991990091999990199991009909910999109099010909009100099909999191090911099009000909090000100099999019999099009099091901119119990099099909000909199100900909099919900091199199000000909199909199001901999999081010099000019091909909190909109999…	TCGA-LUAD	5.334e-05	89
LIPH	CAT	0.6721	co	1	286	000000000000000000000000000000000000000000000000000010000000000000000000000110001000000000000000000000000000000000000000000000000007000000010100000000000000000700000001000000000000000709000000000000000000000000000000000000000000000000000000007010000000000000000000000001000000000000000100700000000000000000000000000070000000000000000000000000000000000000000000000000000000000000000000000000000000000…	TCGA-NORMAL	5.941e-05	89
TST	VEPH1	0.6724	co	1	292	000000000000000000000000001000000000000000000000000010000000100001000000000100000100000000017170000000000000000000000100000000000000000010010070001000000000000000000101000000000000000019010000000007000000000000000000000000000000000000000000000010000000117000000100000070000000000000000000900000000100001000000000000000000000000000000000000000000000000000000000000000000000000700000000001000000000000…	TCGA-NORMAL	0.0003529	89
ARHGAP15	ADRB2	-0.6719	co	1	311	000000000000000000000000000000000000000000000000000010000000000000000000000000000000000000700000000000000000000000010000000000000000000000000000000000000000000000000000000000000000000009000000000000000000000000000000000000000000000000000000700000000000000000000000000000000000000000009000000000000000000000000000000000000000000000000000000000000000000000701000000000000000000000000000000000000000000…	TCGA-NORMAL	0.0003529	90
AURKB	TROAP	0.6975	co	2	736	101111001011100110111101010001001110110011101101011101010101010010100000000001101011001011101011000001011110001110001110001111100011000001101010100111010111110110011000010110010000110119011001110011110110001001001011001100101000101011101111111100001111001100001001001000011110000010011011800001101010011010011100100111001101010011011010111001110001101001010001011010110010100110101111100011110111100…	TCGA-LUSC	0.0005608	90
AURKB	UBE2C	0.8851	co	1	582	000000110100011001000010181110110000000000010010100010001010101101011101011110000100100100010100111010100001100001010000000080001100110010010101011000100000001010100000100001000000001009000100000100001000100000100100100000000101810100010000000010000000110000110110101110100000100101000100801110000001100100000001000000010000100100000100000100001100010100101110100101001001811001000000011100001000011…	GTEx_normal	0.0002592	90
MILR1	GIMAP8	0.6653	co	2	157	100001001001110000010001011001000000100000100000000000010100110100110110000000000000110100000100000000000000000010001770000000000000101110000000100001001001000011010010011011100000100009101000001000000000001000110100011000001010101000000000000000000001000010001100000000000000000110017000001000010100110001100000100000001000101000001101000000000010000000000000110000000001000010110010000000110000010…	TCGA-LUAD	1.071e-05	90
FLI1	NRN1	0.669	co	1	575	010011111110101111111101111011110101101101010180100101110111111111111111111011111101101101010100111001011111001010101011101111110110111101011101011111101111011011110110011101111111101109011111111111010010111101110110111011011110011111111111101100111111010101010101111111118111111111111011010111110110111111111810101110111110111100111000101110010000111101111111111001011110111011101111111111110111111…	TCGA-LUAD	0.0008554	90
TMEM164	KIAA1324L	0.671	co	1	227	000000000000000000070000000000000000000000000000000000000000000000000080000100000000000000000000001000000008000000000000700000000000000000000000800000000700000070000001000000000000000009000000000000700000008000000087000000000000700000000000000000000000100000008000000000000000000000000000900000000000000000000000000000000000000008700000000000000000008000100000000000000000000000000008000070000000000…	TCGA-NORMAL	0.0003529	91
LRRC25	ALDH3B1	0.691	co	1	395	100000000000000700000000000000000000000001000001000100000000000000000000000000000001000000107000000000000000000110000010000000070001000000000010000000000000010000000000000010000000000109000000000000110000010000101001000000000000000000000000001000001000001000000000000000001000000000000000700001100000000001000000000010000000000001000000000000000007000000000001100000000000100100000000000000100001000…	TCGA-LUSC	1.436e-09	91
AKAP2	CDK6	0.6626	co	1	288	111010110111011001110111011101100000001100000100101000000100111101001111101001001010111101000101011111110001110001100001101001101101101111010011111000110117100001101110100001101101100109110108011011001000110111100100110000101011010000111000011100100010008011018101101111100100010010108010000110000111110110100010000111001010001710001110000001011010110001111101000100010111001001000000001101011010000…	TCGA-LUAD	3.122e-08	91
CDCA3	FOXM1	0.8851	co	1	597	010010010100001001000010101010010000000100010010100010001010101101011001111110000100110100010100111010100001010000110000010000011100111110011101011000100000001000100010000001101000001009000000000100001001100110100000010010000101010100010000000011100000110000110100100111100001101101000101801010000101100101000011010000110010100100000100000100001100010110101110100101001101011001000000011100000001011…	GTEx_normal	0.000985	91
C22orf42	AP000679.2	0.6932	co	1	33	999999999999999999999999999999999999999999990999999999999999999999999999999999999999999999999999999999990999999999999999999999199999999999999999999999999999999999999999999999999999999999909999999999999999999999999999999999999999999999999999999999999999999909999999999999999999999999999999999990909999999999999999999999999999999909999099991999999999999999099999999999999999999999999999999999999999999…	TCGA-LUSC	1.012e-06	92
PDIA6	PDIA4	0.8832	co	2	335	000000000000000001007000080000000000800000000000000010000000000000000000000008000000000000000000000000000000000070000000008000800000000000000000000000000000800000000000000000000000000009000000000000000000000000000000000000000000000000000000008010000000000000000000000000000000000000008070900000000000000000000000000800000000000000000000080007000000000000000008008000000000000000800080001000000000000…	GTEx_normal	5.767e-09	92
LAMP3	PRKCQ	0.6703	co	1	270	000000000000000000000000000000000000000000000000008000000000000000000000000800000000000100008000000000000000000000000000000000000000000000000000000000000000000000000001000000000000001009000000700000000000000000000000000000000000000000000000000000000000100000017800000000000000000000007000900000000000000000000000000000000000000000000000000000000000000000000000000010000000000000070000000000000000000…	TCGA-NORMAL	0.0003529	92
S1PR1	GPR116	0.6933	co	1	542	100001000000100110111000000000000001000000101000010100000001000000110010000000110001000011001000000000011100001100001010001010000011000001101010100100000008010180010000010010010001000009001000100000110100000000001011001000010000101011000010101000001111000000000000001000100010000000000010110001000000100000000000100011001000010001111000011001000001001000000000011000100000000100000001000011100000100…	TCGA-LUSC	6.175e-06	92
FAM110C	DEPDC1B	-0.6627	co	1	416	011110110100010010010111101101101101011110110000101000100011111100010111001100111000111101110100110111170110110110001011111010110100111111001081110000100110101100111111101100101101111119100111111011001101011111100110010011101010100001010101017001110100110011101111110101111007101100011011110100001101110101001011110090111111110110011010000101111100100011101100100001111111000701110011010110011101010…	TCGA-LUAD	5.334e-05	92
GTSE1	CDC20	0.885	co	1	628	000010110110011001000110101010010000001100010010100010001010101101011001111110010100110100010100111010100001000001110000110000011100111010010101011000100100001000100000100001100000001010100100000100001001100010100100010010000101010100010000010011100000110011110110100111100001100101000100801110000101100101000011000000110010111100000100000100001100110110101110100101001101011001010000011100001000011…	GTEx_normal	0.000985	92
SLC7A5	SEMA3G	-0.6626	co	1	99	100000010011100000000000001000000000001000010000000000000000100000001000000010000000000011001000000010000000000000000010000000010000000010010101010001000000000000010000000070000000000009000100000001000000000000000000001001000001000000100000000100000100000000001100000000010000100000000000101001000100010001100000000000000000100000000000000010000010000100000000100000000000000100000010000000000001000…	TCGA-LUAD	5.334e-05	93
KIF11	BUB1B	0.8849	co	1	622	000000110000011001000010101111010001000000010010101010001010101101011001111110010100111100010110111010100001100010110001110000011100010010010100011000100100001000100100100001001100001009100000000100001001100110100100011000000101010100010000000011110000110000110100100110100001100101000100801010000101110100000011010000110010001100000111000100001100110110101110000101001001011001010010001000011000011…	GTEx_normal	0.000985	93
ACADL	IFITM2	-0.6702	co	1	320	000000010000000700009900000000009000700000000000000010000000100000000000000100000000000000000000000000000000000000019070909900070000000900000000000000000000090090000000000000000000000009000000900000000901000000000090000000000000900000000000900010000000000000010000000900000000090000009100700000000000000000000900000000000000000000000000000000090000000000000000009000000000900000000000000000001009009…	TCGA-NORMAL	0.0003529	93
GRM1	RBL1	-0.6898	co	1	62	999999999999999999999999999999999909999909990999999999999999999999999999999999999999999909199999999909999999999099999999999999999990999999999999199099999990990999999999999999999999909999999999990999099990909999991999909990999999999999099999991999990099999990999099999999999999999999999999099999999999999999990999999999999999999991909999999999999909999999999990999999999999999999909999999900799999999…	TCGA-LUSC	1.436e-09	93
DQX1	PRSS3	-0.6636	co	1	235	000000000001101010100101010191091000100009000109901001011001001010100001010000000901000009901100009001010110117011000011010111090010010001100000000018000111011011001000001000010100000009001000199700910111011000090011007001171001000010000010000001001100001100010000000000011000000910001010010000109011010001010900109100000101000110001010001000011010100001000100010101010100000110001101110100100100101…	TCGA-LUAD	0.0008554	93
USH1G	TRIM71	0.6949	co	2	98	919999999199099090999999919001099901919908991999999999909919999999999999999009999999919900999999999909999909909999909979999999991999999919999999900909909999991999999999999999191099099009999999999919999999099991999999009999090990991999999999900099999999990999999999909999999099991999999999999999999919009991999909999099991999999999999999099909990991909099900099999099999099999999999999999991900999099…	TCGA-LUSC	0.0005608	94
ARHGEF15	THSD1	0.6626	co	1	647	111111111111110011111111011011111111010111111111111100011111111111111111111011111110110101017101111111101111110011001111118101111111111011108110111111111111101111111110011101111111111109111111111111110100111101111111111111111000011111111111110101110111011111110111111101111111111111111011010101111111111110111111111111101111111011111111111111111111111101111101011001111111100111111011011111110110101…	TCGA-LUAD	0.0008554	94
ARHGEF16	ALPL	0.6699	co	1	341	001000000000800000000000000100000000008000000000000000000000000000000000000100000000000100000000000000000000000000008000100000000000000000000000000000000000000000000001000000000000000009000000000000000000000000000000000000080000000000000000000010000000000000010000000000000008000000000100900000000000000008000008000000000000000000000000000080000000000000000000000000000000000000000000000000000000000…	TCGA-NORMAL	0.0003529	94
DLGAP5	HJURP	0.8846	co	1	648	010010110100011001000110101111110000000100010010101010101010101101011111011110010100110100810100111110100001100000110181110001011100110010010101011000100100001000100111101001000000001019100101000100001001100010100100110010000101010100010000010011010000110010110110100111100001100101000100901010000101100100000011100000111110100100000100000100001100110110101110100101001001011801010010011000011000011…	GTEx_normal	0.000985	94
PRR5	MMRN2	-0.6572	co	1	55	100000000000100000000000001000000000107000000000000000000000100000000000000000000000010000107010000000010000000000000100000000000000000000011000000000000010000000000000000010010000000009000000000001100000000000000000000000000070000000100000000000001000000000001010000000011100000000000000800008000100000007001000000000000000000000000000000000000011000000000000100000000001000000000000000000000000000…	TCGA-LUAD	1.833e-06	95
CCNB1	WNT11	-0.6624	co	1	554	111111811111111010110111111111101171019110101110101100110111111100010111101101001010111101001111110111101010110011101181111111111111101101107101010110111110101011111111101101181110010119110111011811111001011111110110110111101011111011011001110001110001110111110111101011111011111100111110711100111101111000110111101100101011110110011001101110111111101011101011101011111111000011110011010110011111010…	TCGA-LUAD	0.0008554	95
NCAPG	CCNB2	0.8845	co	1	604	000000110000011001000110101110010000000100010018100010101010101101011001011110000100101100018100111010100001000001110000110000011100110010010100011000100100001000100100100001001000001009100001000100001001100110100100010000100101010100010000000011110000110000110100100110100001100101000110901010000101100100000011000000110010000100000100000100001100010110101110000101001001011001010010011000001000011…	GTEx_normal	0.000985	95
TMEM139	ATP13A4	0.6698	co	1	352	000010000000000000000000000000000000009000010110000010000000100000000000000100000100011000000100000000000000000000010000000000000000000000000000000000000001000000000001010001001000000009000000000000000001000100000100000000000101000000000000900011010000000010010001010010000000001011000100001010010100000000000700000000000010100000000000000000000100000010101010000000000000000000000000000000000000000…	TCGA-NORMAL	0.0003529	95
ANXA3	TSPAN13	0.668	co	1	295	000000080000000000000000000000000000000000010000000010000000000000000000000000000000000000000000000000000800000000010000000000000000000000000000000000000000000010000000000080080000000009000000000000100001000000000000000010000100000000000000000000000000000000000000000010000000001000000100701000000000000000000000000070000000000000100000000000000000000000000000000000000070800000800000000000000000000…	TCGA-NORMAL	5.941e-05	95
ITGB3	MAD2L1	-0.6603	co	1	50	000000000000000000000010000000700000100000000170000001010000010000100000000000100001000000008000000000000000000000000000700010070010700000000001000000701070000001010000000007107100700009010100000000000100070700700000000007000000000700000000000000000000001000000000000000000000870700000000070000000000000000000000100000000000700000000001010000000010000001000000700000000000000010000000000000000000000…	TCGA-LUAD	5.334e-05	95
AUNIP	CDC25A	0.6945	co	2	702	000101000000100110111000010000001110110011101101010101000001010010100000000001111011000011101011000000011110001110001081000110100011000001101010100111001011010111010110000110010001110109011000100011110111011001011011100001111000101011101111111100001011001100001001011000011111000010110010900001111010001011011100101110100101010001111010111011010001001001010000011010110000100110111101100011110110100…	TCGA-LUSC	0.0005608	95
ZNF560	CTD-2105E13.6	-0.6933	co	1	39	999999999999999999909999999990999919999999999999999999999999999999999999999999999999999909999990999999999999999999999999999099999999999999999909999999999999091999999999999999919999999999999991999999999099999999999999999999999099999999999999999999999999999999999999999999999999999999999999999999999999999999909999999919999999999999999999909999999991999990999999999099999999999099990999999999999999099…	TCGA-LUSC	0.0001439	95
HIGD1B	GNG11	0.6617	co	2	147	000010000001000000000100000000001000001100000101011000100000100001000000000000000001000000101000001010010000000001001001001001000010001000101001110000000010000110010100000000010000000009000001000000000000000101000010000100000000100100100010100000000101001000000800001008110000000110001000900000100101000000000111000010000000000000101000000000011010001000000001100000010001000000001101100000000001000…	TCGA-LUAD	0.0008554	96
CYP4F2	MAGEA10	-0.6858	co	1	32	990990991999999990999999999999999909999999999999999999999999999909999999999999999999999999999999999999990999999090999999999999999999999999999909999999999999999999999999909999999909999999999990999999990999990999090999999990999999999909999999999099999999999999099999999909999999990999990999999999999999099999999999999099999999999999999009999990099999999909999990900999999999099009099909999990099999099…	TCGA-LUSC	5.094e-12	96
LMO2	AOC3	0.6916	co	2	142	100000000000000000000000000000000000010000000000000000000000000000000000000010000000010000108000000000010000001000000010000000000000000000000000000000000000000000000000000000010000000009000000000000000000001000000001000000000000000000000000001000000000000000000000000001000000000010001001000000000000000000000001000000000000000000100000000000000010000000000000000000000000000000000010000000000000001…	TCGA-LUSC	0.0001439	96
KIF4A	HMMR	0.8837	co	1	596	010000110100011001000010001011010000080100010010100010001010101101011011011110000100100100018100111000100001000000110000110000011100110010010101811000100100000000100100000001100000001009100000000100001000100110100100010010000101010100010000000011000000110010110100100110100000100101000100901010000801100100000011000000010000000100000100000100001100110110101110000101001081011001010010011000001000011…	GTEx_normal	0.0002592	96
HJURP	NCAPG	0.884	co	1	629	010010110000011001000110101111110000000100010018101010101010101101011011011110010100100100010100111110100001100000110081110000011100110010010101011000100100001000100100101001001000001019100101000100001001100010100100010010000101010100010000000011110000110000110110100111100001100101000110901010000101100100000011000000110010100100000100000100101100010110101110100101001001011001010000011000001000011…	GTEx_normal	0.000985	96
KANK2	HOXB3	0.6653	co	1	319	000000000000000000000000000000000000000000000000000000000000000000000000000010000100000000000000001000000000000000000000000000080000000000000000000000000000000000000000000000000000000009000000000000000000700000000000000000000000000007000000000000000000000070000000000000000000700000007000000000000000000000000000000000000000000000000000000000000007000000000000000000000000000000007000000000000000070…	TCGA-NORMAL	0.0003529	96
NCKAP1L	ALDH3B1	0.6856	co	1	349	000000000000000000000000000000000000000001000001000100000000000000000000000000000000000000708000000000000000000110000010000000070001000000000010000000000000010000000000000010000000000009000000000000110000000000101001000000000000000000000000001000001000001000000000000000001000000000008000000001000000000000000000000010000000000001000000000000000008000000000000100000000000000100000000000000000001000…	TCGA-LUSC	1.006e-10	97
PPP1R18	C14orf132	-0.6641	co	1	283	000000000000000700000000000000000000000000000000000000000000007000000000000100000000000000000000000000000000000000000000000000070000070000000710000000000000000000000000000000080000000009000000000000000001000000000008000000000000000007000000000000000000000000000000000000000000700000000000000007000000000000000000000000000000000700000000000000000000000000000000000000000000000800000000000000000000000…	TCGA-NORMAL	0.0003529	97
BPIFB4	GP2	-0.6564	co	1	51	999990999999990970991999099009999979909999999991019900990919999990099909199097999919999999999999990001099199999990199999919999199091009990999999999999910199190190999999999999009999909799909901990099999099999909999999019199990999999997107999999999099990099999999991907009199099999999999909999979999909999999999999099077999909999999999919909990999997099199910997991099999099091999990999009907190999991…	TCGA-LUAD	1.071e-05	97
UGT2A1	ACER1	-0.6879	co	1	120	999999999999909999990999999999999999999999099999999999099999909990990990999999999999999909999919990999999999911999199999999999991990999900999999999999999999999999999999999909999999909199999999999999999999999999999999999009999999990999909999999909909999999999999999999999999999999999999999999909999909909999999999999999999990999909990909190070999099099999999990999900099999990799999999990999990999999…	TCGA-LUSC	1.393e-07	97
BIRC5	KIF2C	0.8837	co	1	616	000000110100011001000110108010010001000100010010100010001010101101011011111110000100110100010100111010100001000000010080110000011100110010010101011000100100001000100000100001100010001019100100000100001000100110100100110010000101010100010000000011110000110011110110100110100001100101000100801110000101100100000011000000110110110100000100000100001100110110101110100101001001011001010010011000001000011…	GTEx_normal	0.000985	97
CLPSL1	CTD-3214H19.16	0.658	co	1	41	999990099999919991090901099999099999999909999019990999099190909999999990991999999999901199999999999999999999199910999999999999999909999099999999999900990999990199901999999999099999909909109909999090990998990909999999909999999099099019999099999999999991999990019990001990999199900999099990909999919099009990999999999091999999090999999090990999999909999999909999009999990999909909099919999990999099909…	TCGA-LUAD	0.0008554	98
LAMP3	MCCC2	0.6637	co	1	297	000000000070000000000000000000000000000000000000000010000000000000000000000100070000000000000000000000000000000700010000000000000000000000000700000000000000000000000001000000000000000009000700700000000000000000000000000000000000000070000000000010000000000000010800000000000000000000000000900010000000000070000000000000000000007000000000000000000000000110000000000010000000000000070000000070000000000…	TCGA-NORMAL	0.0003529	98
KIAA1324L	RBMS3	-0.6637	co	1	335	000000000000000000070000000000000000800000000000000000000000000000000080000100000000000000000000001000000008000000000800700000000000000800700001800000000700000070000000000000000000000009000000000000700000000000000087000000000000700100000080000000000000000000000000000000000000000000000000700000000000000000000000000000000000000000700000000000000000008000000000000000000000000000000008000070000001000…	TCGA-NORMAL	0.0003529	98
KIF4A	NCAPG	0.8836	co	1	613	000000110100011001000110101111010000000100010018100010001010101101011011011110000100100100010100111000100001000000110000110000011100110010010101011000100100000000100100100001101000001019100001000100001000100110100100010010000101010100010000000011110000110010110100100110100000100101000110901010000101100100000001000000010010000100000100000100101100110110101110100101001001011001010010011000001000011…	GTEx_normal	0.000985	98
AUNIP	TTK	0.6914	co	2	732	001111001001100110101000010000001110110011101101011101010101000010100000000001101011010011101011000000011110001110001181001110100011000001101010100111011011110111010110010110010101110109011010100011110111011001011011100101101010101011101111111100001111001100001001010000011110001010110010810001111010011011011100011110000101010011111001111011010001001001010001111010110000100110181101100011100110100…	TCGA-LUSC	0.0005608	98
TSPY8	TSPY2	0.6908	co	1	40	999999999999999999999999999999990999999919999999999999999999999999999999999999999999999999999999999999990999999999999999999999999991999999999999999999999999999999999999999999999999999999999999999999999999999999999999999999999999999999999999999199999999999999999999999999999999999999999999999999999999999919999999999999999999999999991991999999999999999999999999999999999999999999999999999999199999999…	TCGA-LUSC	0.0001439	98
BIRC5	TOP2A	0.8832	co	1	549	000000010000011001000010000010010001000000010010100010001010001101011001011110000000000100010100111010000001000000010000010000001100010010010101011000100000001000100000100001000000001009000100000100001000100000000100000000000101010100010000000011010000110000110110100110100000100101000100901010000001100100000001000000110000100000000100000100001100010110101110100100000001011001010010011000000000011…	GTEx_normal	6.028e-05	98
ACTBL2	UGT2B15	-0.6562	co	1	123	900999907190179991919900001999199090191997990079999999909919999101110991979979999000000099909099900919000919900900999199079009991999199991979999999999091991910919999910971991079979009999909909999799991991919919099999917907919701919019709099999990009091999909109970919010900099919079999199917079919111900190919109999790179919991100909191099909079797909909991199119999901001999909919999019999919910919…	TCGA-LUAD	5.334e-05	99
SLC7A7	HSPB8	-0.6635	co	1	342	000000000000000000000000000000000000000000000000000010000000000000000000000000000000000000000000000000000000000000000000000000000000000000000000000000000000000000000001001000000000000009000000000000700000000000000000000000000000000000000000000010000000000000000000000001000000000000000100000000000000000000000000000000000000000000000000000010000000000000000000000000000000000000000000000000000000000…	TCGA-NORMAL	0.0003529	99
NCAPG	ITGB4	-0.6545	co	1	397	101010100100011010001110100100100011001111010118011100110011010110010111111001011010111101108011110011100110110011100011101000100001100101001010110111110110101100011111101110101101010119100101100101001011001110101001010110101110110000111001011001111010011011111111111111101001001110000011911101811000110001001011110111101111110110000010110011110111100011011001101011111101100111011010010111001101011…	TCGA-LUAD	1.071e-05	99
NKX2-1	SUSD2	0.6862	co	2	593	101101001010100100000000000000000000808000011000000100000000000000110000000000100008000010800000000000011100001100000000000000000010000000000000100001001000010010000000011010010010010019001010000100100110800010001010001001010100001011000011101100000001001100000000000000000000000001000000101001000010000000000181000000001000010001110001100010000101001000000000801100100000000100100010100000800000100…	TCGA-LUSC	6.175e-06	99
KIF4A	ZWINT	0.8835	co	1	607	010000110100011001000010001011010000000100010018100010001010101101011011011110000100100100010100111011100001000000110000110000011100110010010101011000100100000000100100100001100000001019100000000108001000100110100100010010000101010100010000000011100000110000110100100110100000100101000100901010000101100108000011000000010000000100000100000100101100110110101110100101001001011001010010011000001000011…	GTEx_normal	0.000985	99
LIMS2	MAGED2	0.6525	co	1	32	000000000000000100000000000000000000100000000000000000000000000000000000000000000008000000101000000000000000000000000010000000110000010000101001000100000000000000000000000000000000000009000001000000100008000000000000000000000010000001000000000000001000000000000710000000000000000000070000700000000000000001000000000000010000000000000000000001000007000000000000100000000000000000000000000000000001000…	TCGA-LUAD	3.122e-08	99
FABP12	AP000679.2	0.6849	co	1	30	999999099999999999999999999991999999999999999999999999999999999999999999999999999999999909999999999999999999999999999999999999999999999999999999999999999999999999999999999999999999999999999999999999999999999999999999999999999999999999999999999999999999999999999999999999999999999999999999999999999999999999999999999999999999999999999999999999999999999999999999999999999999999999999999999999999999999…	TCGA-LUSC	3.752e-09	99
GHR	C16orf59	-0.6527	co	1	551	111111111111111111101111111111101111100101101100111101100101011111101110101101111011111111001111110101111118111111111111101100111111111111111111011111011111111111110111111101111111110119111111111011110110111111110810001110111011811011111111110101111011110111111111111101111111111110111011910101101111111110110110111011111111110110111011011001111011111011101011111011111011111001011081111111110101111…	TCGA-LUAD	1.071e-05	100
SHISA9	MAGEA2	0.6861	co	1	102	990999999999999999099991999999999999999901999999999999999999999919990999999999999999999999999999999999909999999199999999990999990999999999999909099999999999999990999999990999999999999919990999999999999999999999991999999990999999999990999999990999999909990999099999909999999999999999999991999999999909999999919999099099919999099999999910919909999999999909999999990999090999999199999999999909199999999…	TCGA-LUSC	6.175e-06	100
ZIC4	TAS2R50	-0.689	co	1	30	999999999909999199999990999999999999999999099999999199999999999999999999999099999999999910999999999999999999909099999999999999999999999909999999999099999999990999999099999999999999999099999999999999099999999999999999999999999999999999999999901999999999999999999999909999999999999999999999199999999999999999999999999099979999999999999999999990999999999999999999799099999999999999999999999999919999999…	TCGA-LUSC	0.0002918	100
DENND5A	ERO1L	0.6631	co	1	332	000000000000000000000000000000000000000000070000000010000000000000000000000000000008000000000000000000000700000000000000000000000080000000000001000000000000000000000000000000000000000007000000000000000000000000000000007000000000000000000000000000000000010000000000000000000000000000000000707000000000000000000001000000000000070000000000000000000000000000000000000000000000000000000000000000000000000…	TCGA-NORMAL	0.0003529	100
PLLP	NGFRAP1	0.6627	co	1	277	070070000000000000000000000000000070000000070000000000000000700000000000010000000000000000010000000000000000000070710000007000000000001700017070011000000000000000000700071000000000000009070000000000001000000107000170700070000100700000000007000000000007118000000000007007000007100000077100700010700107000000700701007070000000000000000000000000000000000000000000000000000070700000000000001000000000700…	TCGA-NORMAL	5.941e-05	100
TPX2	MKI67	0.883	co	1	580	000010110100011001000010001010010000000000010010100010001010101101011011011110000100100100010100111000100001000000010080000000011100110010010101011000100100001000100000100081000000001009000100000100001000100010100100010000000101010100010000000011110000110000118100100110100000100101000100801010000101180101000011000000110110000100000100000100001100010110101110100101001001011001000010011000001000011…	GTEx_normal	0.0002592	100
EFS	STIL	-0.6516	co	1	359	111111811111110000110110011111000110101100011010000101101100010010100111001100110010111000010110100110001100110110101081110010001001110111101011010011101010011010110101111001110011110019111118010101011100110111111000101110010101111011010011100001110111011001111110001011110011101000010010011101000101000100101110111000010110111000110110101000010101101111011101110111100100100011011110010110801111111…	TCGA-LUAD	2.635e-07	101
SHE	ROBO4	0.6889	co	1	689	101101111010100100100000010101000110118011111000010101111101110010110100011010111001001010008110100000111101000101001100110110000011000100000000000111011010110010000010011110111010110109011110001101110100001011011011001001111100101011000010111100000111000000010011000000000010000101010011011111100000101000011100111110001000111101111001111010000101001101000000111000110010100111101010000011100111100…	TCGA-LUSC	0.0005608	101
C2	MMP28	0.6623	co	1	272	000000000000000000000000000000000000000000000000000010000000000100000000000100000000010100700000000000000000000000000000000000000000000000000000000000000000000000000000001000000000000009000000000000700000000000000009000000000001000000000000000010000000000000000100000000000000100000007100900010000000000000000000000000000000000000000000000000000000001000100000000000000000000000000000000000000000000…	TCGA-NORMAL	5.941e-05	101
KIF4A	CENPF	0.8827	co	1	600	100000110100011001000010001011010000000100010010101010001010101101011001011110000100100100010100111000100001000000110000110000011100110010010101011000100100000000100000000001100000001019000000000100001000100010100100010010000101010100010000000011000000110010111100100111100000100101000100901010000101110100000001000000010000000100000100000100001100110110101110100101001001011001010010011000001000011…	GTEx_normal	0.0002592	101
SKA1	KIF4A	0.8828	co	2	630	010000110100011001000110101011110000000100010010100010101110111101011111011110000100100100010100111011100001000000110000110000011100111010010101011000100100001000100100101001100000001019100001008100001001100110100100010010000101010100010000000011110000110010110100100111110000100101000110901010000101100100100011100000110010000100000100000100101100110110101110100101001101011001010010011000001001011…	GTEx_normal	0.000985	101
ALOX5	ALDH3B1	0.6831	co	1	378	100000000000000000000000000000000000001001000001000100000000000000000080000000000000000000100000000000000000000110000080000000080001000000000010000000000000010000000000000010000000000109000000000000110000000000101001000000000000000000000000001000000000001000000000000000001000000000000000000001100000000001000000000010000000000001000000000000000000000000000000000000000000000100000000000000000001000…	TCGA-LUSC	1.006e-10	101
SEMA6D	ESAM	0.6523	co	1	492	111101111111111111111111018011111101011101111100101101010111011110111111111001110011111000001111011111081111111111001101111111111111111111110100111111111111101011018110011111110111110119101111811111010100111111011110001110111010111111111110100100110111011111001811101018100110100111110011010101101010011010101110101001111001110010111010011101110118111101811001811001111101111111110111110011110110111…	TCGA-LUAD	1.071e-05	102
MYBL2	CDC20	0.8824	co	1	614	000000110100011001000000101010110000001100010010100010001010101101011101111110010100110100010100111010100001100000010000110000011100111010010101011000100100001000100000101001100000001009100100000100001000100000100100110000000101010100010000000011000000110011110110100111100000111101000100101110000101100101000011000000010100110100000100000100001100110110101110100101801101011001000000011100001000011…	GTEx_normal	0.000985	102
PIP5K1B	B3GNT8	0.6618	co	1	291	000000000000000000000000000000000000000000000000000010001000001000000001000100000000000000000000000000000000000000000000000000010000000000000000000000000000000000100001000080000000000009000008000100001000000000000000000000000000700000000000900000000000100000000010000010008000000000000000700010000000000000000000000000000000000000000000000100000000000000000000000000000000000000000000000000000000000…	TCGA-NORMAL	5.941e-05	102
LMO2	CD93	0.6836	co	2	104	100000000000000000000000000000000000010000000000000000000000000000000000000010000000000000108000000000010000001000000000000000000000000000010000000000000001000000000000000010010000000009000000000000000000001000000000000000000000000000000000000000000000000000000000000000000000000010000001800001000000000000000000000000000000000000000000000000000010000000000000000000000000000000000010000000100000000…	TCGA-LUSC	6.175e-06	102
SNAI2	CTHRC1	0.651	co	1	458	111111111111010111111111111111111111101111101111111100011011110111101111101101011110101001011111110101111111110111101111111111181101101111101011101001110111101101111110111101101100110119111011111111101011011111111111011111111110110111111101111101011110000111101111011111111111001011100011811101111101111111111010110111111011111110111111111001111018111011110101811011111111100101111081010111110111111…	TCGA-LUAD	3.122e-08	102
CACNA2D2	ERBB3	0.6621	co	1	319	000000010000000000000000000100000000000000000000000010000000000000000000000100000000000000000000000000000001000000000000000000000001000000000000000000000000000000000000000000000000000009000000000000000000000000000000000000000000000000000000000010000000007000000100100000000000000000000100000000000000000000000000000000000000000000000000000100000000000100000000000000000000000000000000000000000000000…	TCGA-NORMAL	0.0003529	102
SH2D3C	NRN1	0.6534	co	1	580	011111111110111111111101111111111101108101011110100101111111111111111111111011111101101101018100111011111111011010101011101111110100111101011101011111101111081011111110011101111111111119111111111111010000111101110110111011011110011111111111101100111111010101011101111111111111111111111011011111110010101110111110111110101110111100111010101100010000111101111111111011011110111011101111111111110111111…	TCGA-LUAD	0.0008554	102
IVL	KRT6B	0.6821	co	1	480	990000909000100090009900909000090009909009000990090990000000909000010000910009190091000909909990009909099000001900099099000000090019990090099909090000999000010990000000011990010019000909001010900109100000090000009909009990910199000010000010099100000091990090009900009000009910009009000990001909999010009099000100009090900900091000100000000010099009900000900009000990090000990909010110019990000900909…	TCGA-LUSC	1.579e-08	103
GHR	PKMYT1	-0.6495	co	1	479	111111811111110110101111111101111111100101101110101100101101010110110111101101111010111111001111110111111118111111110111101000081101101110108010000100111111110111110110111100111111110009111111101111111110111111110810011111111110111011101111110101111111110111111101011101111111811111101011911101111110111110110110111011111111111110111110011001110011101011101001111010111011101000111011111011110101111…	TCGA-LUAD	1.833e-06	103
FMO5	LEPREL1	0.6614	co	1	266	000000010000000000000000001010000000000000000100000000000000000000000001000100000000000100000000011000000010000000000000000000000000000000010100000000000000000000000000000000000000000009000000000000000000000000000000000000000101000000000000000000100000100000000100000000000000100000000000901110000000000000000000000000000100000000000100000100000000000000000000000000000001000000000000000070000000000…	TCGA-NORMAL	0.0003529	103
NCAPG	KIF2C	0.8823	co	1	607	000000110000011001000110101110010000000100010018100010001010101101011001011110010100100100010100111010100001100000110080110000011100110010010101011000100100001000100000100001001010001019100001000100001001100010100100010010000101010100010000000011000000110000110100100110100001100101000110901010000101100100000011000000110010000100000100000100001100110110101110100101001001011001010010011000001000011…	GTEx_normal	0.000985	103
CYP4F11	AKR1B10	0.6835	co	1	303	991000001000000000100009900900009009000000911900019000000000900010000010911009009000001000091000010900000900000190000090009900000000010000090010090100001000000910000000000010000001900019900019000190000109000000001019001000110999090010000010190000900011000091001000101000000019001000009001001100009010000010001100000090000000090090110019009009099100000100009010010000000000100000199000010000100000190…	TCGA-LUSC	6.175e-06	103
TPX2	CENPF	0.8821	co	1	576	100000110100011001000010001010010000000000010010101010001010101101011001011110000100100100010100111000100001000000010080010000011100110010010101011000100100001000100000100001000000001009000000000100001000100010100100010000000101010100010000000011010000110010110100100110100000100101000100901010000101110100000011000000110000100100000100000100001100010110101110100101001001011001000010011000001000011…	GTEx_normal	0.0002592	103
EMCN	GHR	0.6501	co	1	588	111111111111111110111111111100111111101101111110111101111101111111101111111101111011111181011111111101111111111111001111101101111110110111111011011111111111111011110111111101111111111109111111111111111110111111010110011111111111811111111111010101111111011111011111111110111111110011101011011111111111111111110110111111111111110111101010011001111181111111111001111110111111101111111111110011110111111…	TCGA-LUAD	1.071e-05	103
AURKB	MYBL2	0.8823	co	1	609	000000110100011001000000101010110000001100010010100010001010101101011101111110010100110100010100111010100001100000110001110000011100110010010101011000100100001000100000101001100000001009100100000100001000100000100100110000000111010100010000000011000000110000110110100111100000111101000100801110000101100101000011000000010000100100000100000100001100010110101110100101801101011001000000011100001000011…	GTEx_normal	0.000985	103
GTSE1	CDCA5	0.8823	co	1	608	010000110100011001000010101010110000001100010010100010001010101101011011011110000100110100010100111110100001000001110000110000011100110010010101011000100100001000100000101001100010001019100101000100001000100010000100010000000101010100010000000011010000110001110110100110100000100101000100801110000101100101000011000000110110000100000100000100001100010110101110100101001101011001000010011000000001011…	GTEx_normal	0.000985	103
SDR42E1	TAL1	-0.6515	co	1	169	011777000011100010710710000100001101000110100110000100100000010000010070000000100010001011101110110010177001000100001000100010000001010101001010010000007000017071000010000070100001000109111000001000100000070017001010000011101010701007000000000700000017007010001071000100010101000000170000800008000000710001111700101000000000011000101000000000000017000000000000017000777000100000700010700000000110700…	TCGA-LUAD	0.0008554	104
S1PR1	DUSP4	0.6844	co	1	493	001110010000710000700001001101100101000001000107701100110000110000001000000000001170011100010007001710000010110000101010101000000000101100010000110100000010701000000110100101101100000009000000701010000000100001000100110700000001100170100107011000010100011010001170000101700000000100010001000700010101010071000011000070110110100100000101100010010007010000100100100001001111010100010000000170000111010…	TCGA-LUSC	0.0001439	104
S100A14	ABCA3	0.6613	co	1	298	000070100000000001000000000000000000001000000000000000000000000001000000100100000000000000710000000000000000000000000000000001000000000000007000000000000000700000000001100000000000000009000000000000001000000000007000100000000000000000000000000010100010107000000100000000000000000000000100900010000000000100000070000000000000000000000000000000001000000010000000000100070000701700007000001070000000000…	TCGA-NORMAL	0.0003529	104
DLGAP5	BUB1B	0.8816	co	1	646	010000110000011001000010101110110001000100010010101010101010101101011101111110010100110100810100111010100001100000110081110000011100110010010101011000100100001000101110101001100100001019100101000100001001100110100100010010000101010100010000010011110000110011110110100111100001100101000100901010000101100100000011100000110010110100000100000100011100110110101110000101001101011801010010011000011000011…	GTEx_normal	0.000985	104
HIGD1B	ITGA2	0.6491	co	1	206	100001000000001011000010000100010010000010100000110100000000001000000010001001000110101000101011110000070101100008000000000000170101010000000010100000010000100000100001000010000101001119000101100000000010100000001001010100100000010001011000011100001000000100001810001108100001000010000001900010000000111000010001010111001010000100000000110000001000000000011101801010101000100100110000011011100010101…	TCGA-LUAD	0.0008554	105
KIF11	MKI67	0.8815	co	1	610	000000110000011001000110001011010000000000010010101010001010101101011011011110000100101100010100111000100001100010110001110000011100010010010100011000100100001000100100100081001000001009100000100100001001100110100100011000000101010100010000000011110000110000111100100110100001100101000100801010000101110100000011010000110010001100000100000100001100110110101110000101001001011001010010081000011000011…	GTEx_normal	0.000985	105
PIP5K1B	MMP28	0.6605	co	1	360	000000000000000000000000000000000000000000010000000010000000001000000001010110000000000000000000000000000000000000010000000000010000000800000000000000000000000000000000001000000010000009000008000100001001000000000009811000010100000000000000900010000000100000000000000010000000100000080100001010000000000000000001000000000000000000000000000100000100000010000000000001000000000000000000000000000000001…	TCGA-NORMAL	0.0003529	105
CDCA5	KIF20A	0.8815	co	1	623	010000111100011001000010101011110001001100010010100010001010101101011011111110000100110100810100111010100001100001110000110000011100111010010101011000100100001000100000101001101010001019100101000100001000110010000100010010000101010100010000000011010000110011110110100110100000100101000100901110000101100101100011000000110110100100000100000100001100010110101110100101001101011001010010011100010008011…	GTEx_normal	0.000985	105
EMCN	GNG11	0.6487	co	2	131	010010000001000000001000000000000000001000000101011000000000100101000000000000000010000010101000001010000000000000101000001001000000001000101001110001000110000110010100000010000000000009000001000000000000000101000010000100000000000100100000000000000101001000001000001000100000000000001000800001100101100000100010000010000000010000101000000000011010001000000000000000010001000000010001000100000001000…	TCGA-LUAD	1.071e-05	105
GEMIN4	GSG2	0.6836	co	1	618	001001801010000010000100000000001011107001101001010101000101000010100100000001101011000001101011008101011110001100001010000111100011000000101010100110010100010011000010000110110000110809011010100001110110011001001011000101101010101011001010101100101011001100000000000000001010000010010000710101101010001001001100000110001801010010111000111001008001001001010000011010000000100110101100100011100110100…	TCGA-LUSC	0.0001439	105
CDCA3	TGFA	-0.649	co	1	398	111080110100011110110010101110101100011101010010110100100000111101010111111100010100111111100111110011110101110000100081110000010100111101108011110000100101801001001111100001101100010819100111010101001011111110108100110111101110010100010101011011110010111117111111100810171007101110100011101101110101117101101010010100101111810101001111000100001107100011101011001011001181700011010010011810101108011…	TCGA-LUAD	0.000229	105
IL37	IL36G	0.6456	co	1	252	911100090991911091010111011900191090091109090100001001017010111119009097119190011990111100000700099010999919110917100791107101001909101111099901019001009171901001001119101191101109190909719190011911009900011111110190119911091111919099190100990900100100919910110101110111110100110009111191019000910111109100109911191090010110091011901101001000071019910001101010099991011111909001009000991100111101011…	TCGA-LUAD	3.122e-08	106
SPRR1A	SPRR2A	0.678	co	1	274	900999909000900990900900009090090909009009090009999090900900999199009900909099090900009909909990009909099909091990990099009000990909099999099909099900099099909990990999090099000099099999890900909009900909999000009999000000900090000009009009009009099090999990009990009009000909900099099990900900099000009990900990990099999999090000990090000010099909900099999099909990990009990009099009909999099900900…	TCGA-LUSC	5.094e-12	106
CCNB2	MYBL2	0.8813	co	1	617	010000110100011001000000101010010000001100010010100010001010101101011101111110010100110100018100111010100001100000110000110000011100110010010101011000100100001000100000101001100000001009100100000100001000100100100100110000000101010100010000000011010000110000110110100111100000111101000100101110000101100101000011001000110100100100000100000100001100110110101110100101801101011001000010011100000100011…	GTEx_normal	0.000985	106
KIAA1324L	RPS6KA2	0.6601	co	1	294	000000000000000000070000000000000000800000000000000000000000000000000080000100000000000000010000000000000008000000010000700000000000000800000000800000000700000070000001000000000000000009000000000000700000000000000087000000000000700100000080000010010000100000000000010000000000000000000000700000000000000000000000000000000000000000700000000000000000008010000100000010000000000000000008000070000000000…	TCGA-NORMAL	5.941e-05	106
ATP11B	ABCC5	0.6807	co	1	470	001000101000000000100000000000000000810001080000000000010010000000000000000000080008000000000000000000008000000000000010000000181080000000000010100100001000000000000000080010000010000009000000000000000000001000001800000001100000000000000000101000000000001000000000000800000000001001010001100010010000000001010000000100010101000001010008110010000800000000000000800000000000000100100000000800100001100…	TCGA-LUSC	1.579e-08	106
CACNA2D2	MMP28	0.6603	co	1	358	000000010000000000000000001000000000000000000000000010000000001000001000000100000100000000010000001000000000000000010000000000010000000800000000001000000000000000000001000000000000000009000000000000001001000000000009000000000001000000000000000010000000100000000100100000000000100000080100000010000000100000000000000000000000000000000110000100000000010010001000000000000001000000000000001000000000001…	TCGA-NORMAL	0.0003529	106
TRIM72	TINAG	-0.6489	co	1	54	999901191999909999999990999999999999099999991999979999999199999919099099999997099919999999999919999999999919199991990999999990999199999999999919999999999999991999910999010999199909999999999999991999990999999909097999199999999999999999999909999199991919999919999090997919999099909909999999909999999090999919999999999999999999909909919909999999999919999999999999999909999999799999999999999199999999199…	TCGA-LUAD	0.0008554	106
NUSAP1	MELK	0.8809	co	1	564	000000110000011001000000001010010000000000010010100010001010101101011001011110000100100100010100111010100001000000010000010000011100010010010100011000100100001000100000100001000000001000100100000000001000100010000100010000000101810100010000000011010000110000110100100110100000100101000100801010000101100100000011000000110010000100000100000100001100010110100110000101001001011001010010011000001000011…	GTEx_normal	0.0002592	106
ADAMTS20	MAB21L1	0.6812	co	1	64	999999999999999999900990999999999999999990990999999999999999999999999999999999999990999909999999999999999999999999999999999999999999999999999999999999999999999999999999999999999099999999999999999999999999999999999999999999999099999999099900999999999999999990099909999999999999999990999999999991999999999999909990099909999999999990999990999999999990999999999999909919999999199909999999999999999999999…	TCGA-LUSC	1.012e-06	106
KIAA1324L	TOX	0.6599	co	1	324	000000000000000800070000000000000800801000000008000000000000000000000080000100000000000000800000007000000008000000010010700000100000000800000080800000000700000070081001100000000000000009000000000000700000000000008087000000000000700000000080800010010000100000000000000008000000000000008000900000800000000000000000000000000000000000700000000000000008008010000100000010000000000108000008000070000000000…	TCGA-NORMAL	0.0003529	107
ZFP42	MAGEA11	0.6816	co	1	45	999999999999999099999999999999999909999900099999999990919999999909999999999999999999999909999999999999999999990999999919999999999990999999099999999999909999999099999999990999999990999909999999999999999999999999999999999999999099999999999999990999991999999099999999999999999999999999999901999999099999999999999999999109999999999990999999999990999999999999999991999909199999999999990909099900199999999…	TCGA-LUSC	3.211e-05	107
NFASC	TNXB	0.6475	co	1	596	101111011111101100111111111011111101118111111111111101111111111101811111001111111111111111011111111111011111100111000111101101110110111101718101011111111011111111111110011101111111111119110111110111110110110111110111110111111100111111011111111101111111110111111111111001111110111111111010011101011100111110111110111011101111111110111001111101110181101001111110110001111111000011111111011810010111111…	TCGA-LUAD	0.000229	107
SLC39A8	GPR116	0.6816	co	1	622	000101001010100110111000010001000001000000101000010100000001000000110010001001110000000081101011000100081100001100001010111010110001000001001010100110000100010180010000010111010001000109001010100000110100000100001011001100011000101011100000101000001111000100000001001000100010000111000011710001101000110000010000101011001000011001111000011001000001008000000000011000111000000110110011100011100001100…	TCGA-LUSC	3.211e-05	107
CEP55	NCAPH	0.8805	co	1	623	010000110000011001000010001010010000000000010010100010001010101101011111111110010100110100010100111011100001100000010000110000011100111010010101011000100100001000100000100001001100001009100100100100001001100110100100010000000101010100010000000011010000110000110110100110100001100101000100901010000101110100000011000000110110111100000100000100001100110110101110100101001101011001010000011100001000011…	GTEx_normal	0.000985	107
RAD51AP1	TROAP	0.6835	co	2	712	101101001010100110101101010001001110110011101101011101010101010010100000000001101001001011101011000000011110001110001110001111100011000001101010100111010010110110011000010110010000110119011010100011110100001001001011001100101000101011101111111100001111001100001000011000011110000010011001000001101010011010011100100111000101000011011010111001010011001001010001011010110010100110101101100001110110100…	TCGA-LUSC	0.0005608	107
NRN1	ACVRL1	0.6473	co	1	593	111111111110111111111101111111111101101101011110100101111111111111111111111011111101101101010100111011111111111011101011101111110110111101011101011111101101111111111110111111111111111119111111111111010000111111110110111011011110011111111111111100111111010101011101111111111111111111111011011111110110111111111110111110110110111100111010101110010000111101111111111001011110111011101111111111110111111…	TCGA-LUAD	0.000229	108
DNAJC5G	SMCP	-0.6809	co	1	48	999999999999999999999999999999999999999999999999999999909999999999999999999999999999999999999999999999999999999999999199999999999999999999999999999999999999999999999999999999999999999999999999999999999999999999999999999999999999999999999999999999999999999999999999999999999999999999999999999999999999999999919999999999999999999999999999999999999909999999999999999999999999999999999999999999999999999…	TCGA-LUSC	6.175e-06	108
TMPRSS11D	SPRR2E	0.6832	co	1	676	999999999991119991919911119991999199991999999999999991919919999199199919999999199991999999999999999999199999191999991199919919991919199999999919999991999199919991991999919199919199199999111999919919911919991199199999119199919999199999119919919911999191999999119999999199911999919199999999911999999919919999991991999999199999999119999191191919999999911999999999999999991199999919119999999999919919911…	TCGA-LUSC	0.0005608	108
NUF2	KIF11	0.8801	co	1	628	000000110000011001000110101110110001000100010010100010101010101101011001011110000100110100010100111011100001100011110000110000001100110010018101011000100100001000100100100001101100001009100000000100001001100110100100010000000101010100010000000011110000110010110100100110100001100101000100801010000101110100000011000000110010101100000100000100001100110110101110000101001001011001010010011000011000011…	GTEx_normal	0.000985	108
FXYD6	ST7	-0.6595	co	1	351	000000000000000000000000000000000000000000000000000010000000000000000000000010000100000000000000000000000000000000000000000000000000000000817100000000000000000000000000000000080000000009000000000000000000000000000000000000000000000000000000800010000000100000000000000001000000000000000100700007000000100000000000000000000000000000000000000000000000000000000000000000000000000000000000000000000000000…	TCGA-NORMAL	0.0003529	108
KDM5B	RBMS1	0.6594	co	1	337	000000000000000000000000000000000000000000000000070810000000100000000000000000000000000000000000000000000000000000010000000000000000000000000000000001000000000000000000000000000000000007000000000000000000000000000000000000000000000000000000000010000000000000000000007000000000000000010100700000000008000000000000001070000000000000700000000007000000000000000000000000000000700700000000000700000008000…	TCGA-NORMAL	0.0003529	109
CDCA5	EFS	-0.6446	co	1	344	111111101111110000110010110101100111100100001100100101100110010010100110100100110110111100000010100111111100110101101101100011000001101101101010000011101111011010010101110000111101110019111111010001010101111111111000111111010010101011000111100101110111011001011010001001110011001100010010010101010100000101101110111100100100111110111011101000010011101011111001011010100100100010011100000110011110110…	TCGA-LUAD	1.833e-06	109
KIF23	ADAMTS9	0.6469	co	1	311	111110001111000000110001100000101101001010000000001001010101010000100110100001111110001081708011000101001000110011001080101101110001101001000000000001111010100011011111010000001111010119000111111110100010810001100000101111111000000000001111017100010110001001001011011001010101011000101011111100111000010001100000111011001101111100011011000011110011101001010101010010000010000110111101000010010101000…	TCGA-LUAD	0.000229	109
KPRP	CXorf48	0.676	co	1	42	999990999999999999999999999999999999999999999999999999999999999999999999999999999999999999999999999999999999990999999999999999999999999999999999999999999999999999999999999999999999999999999999999999999999999999999999999999999999999999999999999999999999999999999999999999999999999999999999999999999999999999999999999999999999999999999999999999999999999999999999999999999999999999999999999999999999999…	TCGA-LUSC	5.094e-12	109
GTSE1	MKI67	0.88	co	1	617	110010110100011001000010001011010000000100010010101010101010101101011011011110000100110100010101111000100001000001110001010000011100111010010101011000100100101000180000000001100000001019100100000100001000100010000100010010000101010100010000010011110000110000111110100111100001100101000100001010000101110101000011000000110110101100000100000100001100010111101110100101001001011001010000011000000000011…	GTEx_normal	0.000985	109
GTSE1	TPX2	0.8795	co	1	573	000010110100011001000010001010010000000000010010100010001010101101011001011110000100100100010100111000100001000000110080010000011100010010010101011000100100001000100000100001000000001009000100000100001000100010000100010000000101010100010000000011010000110000110100100110100001100101000100801010000101100101000011000000110010000100000100000100001100010110101110100101001001011001000010011000001000011…	GTEx_normal	0.0002592	109
VWF	NRN1	0.6465	co	1	539	011111111110101111111101011010110101101101011110100100111110111111011111111011111101101101018100101001011111011010101011101101110100111101001101001111101110111011100110011101111111111109011111111011010000111101110100101011011110011111111111101100011111010101010101011111111111111101111011010111110010101111111110101110100110111100011010101110010000111101111111111000011110111011101111011111110111111…	TCGA-LUAD	0.0008554	110
ST3GAL5	CAT	0.6592	co	1	307	000000000000000000000000000000000000000000000000000010000000000000000000000010000000000000000000000000000000000000000000000000000000000000010100000000000000000000000001000000000000000009000000000000000001000000000000000000000000000000000000000010000000000000000000000000000000000000000100700000000000000000000000000000000000000000000000000000000000000000000000000000000000000000000000000000000000000…	TCGA-NORMAL	0.0003529	110
TCF21	SDK2	0.6438	co	1	535	111110111110001110111111111011111111101111111110111101111111111111111111111101111111111111911111111110181111108011101181111111011111111111001001011111101111111111110110011111101111111109111111111111110100111111110010101011111110111111111111910101101111011111111110111111111111111111111011811110011110111011111111111111111010111010111111111101110181108101711111010110111111001011110101111011010111111…	TCGA-LUAD	1.833e-06	110
ASPM	MKI67	0.8793	co	1	593	100000110100011001000010001111010000000100010010100010101010101101011001011110000100100100010100111000100001000000010000110000011100110010010100001000100100000000100000100081001000001009100000000100000000100010100100010000000101010100010000000011010000110010118100100111100000100101000100801010000101010100000011000000100010100100000100000100001100010110101110000101001001011001010010011000000000011…	GTEx_normal	0.0002592	110
CHRNA9	DSG1	-0.6801	co	1	137	999999999909799119991990999999999999999919199997719999999990999909009999999999999999999999999909999199999999990090099090990990999999999999799979999999999199901991999099999990999999999909991907999999999999999099999999999791999999099911199999090999997991999990099991919999999999999999990997999999799999909999900999999177999999999990999990099909999991999991999997990909990990099099917997109991099999099…	TCGA-LUSC	6.175e-06	110
CLEC14A	GJA1	0.6437	co	1	384	111111101100000011001110110011100111000010010110111100001101111111001111101000001110111110010111101000180110101100100011010000171000111110010111181001011118100011101110111111100010111019010111100111010100100100001111111100111000111111010111110001011011010101011111101010111001101011011001811111101001101100111110111101111101010110101010111100001100111101111111011101111001111101110010111111110000111…	TCGA-LUAD	2.635e-07	110
SEMA6A	TIE1	0.6442	co	2	555	111111111111010011111111011011111111118111011110118000111111111111111101111011111111111101018111111111080111110110101801111111111111111811110110101111111111101111111111001111111111110109111111101111010100111111110110111111111110111111111111810001111101010111111111110111111111111111101011011111011111111100111110111111111011111110001111111101111101111101111111111011111111111111111111111111110110011…	TCGA-LUAD	1.071e-05	110
TMEM163	KIAA1324L	0.6592	co	1	291	000000000000000000070000000000000000801000010000000000000000000000000080000100000000000080000000001000000008000000000000700000000000000800000000800000000700000070001001000000000000000009000000000000700000000000000087000000000000700000000080000000010000000000000000010000000000800000000000900000000000000000000000000000000100000000700000000000000000008000100000000000000000000000000008000070000000000…	TCGA-NORMAL	0.0003529	110
ITGB4	RECQL4	-0.6417	co	1	305	111000110000011011001000100110000011000111010111111100101001000000080000110001011010100001108111010001001111110000010080011000111101010111008010110111010000101100111111100111000001011109000011100101001001101010001101011110100101110000110001011000011110111001101011001011101000101111000011108101801000010110001010010111011110000110000010110001010811100111111011001010000000100101001000010111001101101…	TCGA-LUAD	1.833e-06	111
CCNB2	TROAP	0.6816	co	2	721	101101001011100110111001010001001010110011101101011101010101010010100000000001101011001011108011000001011110001110001110001111100011000001101010100111010011110110011000010110010000110119011011110011110110001001001011001100001000101011101111111100001111001100001001011000011110000010011001000001101010011010011100100111001001000011011010111001000011101001010001011010110010100110101101100011110011100…	TCGA-LUSC	0.0005608	111
SYT15	C2	0.6584	co	1	341	000000100000000000000000000100000000000000000000000010000000000000001000000100000000000000700000000000110000000000010000000000000000000000000800000000010000000000000001001000000000000009000000800000701011000000000000000000000101000000000000000010000000100000000100000000000000000000007000900010000000000000000000000000000100000000000000000000000100000010000000000010000000001000000000000000000000008…	TCGA-NORMAL	0.0003529	111
RRM2	CCNB2	0.8792	co	1	554	000000110000011001000000101010010000000000010010100010001010101101011001011110010100100100010100111010100001000000110000010000011100010010010100011000100100001000100100100001000000001009000000000000001001100000000100010000000101010100010000000011100000110000110100100110100000100101000100000010000001100100000011000000110010000100000100000100001100010110101110100101001001011001010010011100001000001…	GTEx_normal	0.0002592	111
DLGAP5	KIF20A	0.8787	co	1	549	000000110000011001000010001010010000000100010010000010001010101101011001011010000000100000810100111000100001000000110081100000001100010010010100011000100000001000100000000001000000001019000000000100001000100010000100010000000101010100010000000011010000110010100110100110100000100001000100901010000101100100000011000000010010000100000100000100001100010110101110000101000001011001010010001000000000011…	GTEx_normal	6.028e-05	111
FXYD1	FAM114A2	0.6389	co	1	53	100000000010100100000000001000000000101000000000000000000000000000100000000000000001000000800000070010080000000000000080001000010000000000001001100800000010000000000000000000000000000009000000000000800000000000000000000001000010700000700000000000000101001000000000100000000000000000010000000000000100000007000000000000010000000000000001000000000010000000000000700000000000000000000000000000000009000…	TCGA-LUAD	5.334e-05	112
KIF2C	CDC20	0.8785	co	1	559	000000010000011001000000101010010000801000010010100010001010101101011001011110001100100100010100111010100001000000010080010000001100110010010101011000100100000000100000000001000010001009000000000100001000100000000100010000000101010100010000000010000000100011110100100110100000100101000100801010800101110100000011000000010000100000000100000100001100010110101110100101000001011001000010001000001000001…	GTEx_normal	0.0002592	112
C3orf65	CDH18	0.6798	co	1	31	990999999999999099999999999999999999199999999999999999909999999999999999999999999990999909099999999999999909991999999099999009999909999999990999999999999999999099999999999999909999999909999999999909909999990999999999999999999999990990999999090999999999990999999900999999999999999999999999909999999999999991990999999999999990999999999999900999999999999999999999999999999999999999999999999999909909099…	TCGA-LUSC	0.0001439	112
KIAA1324L	ALOX15B	0.658	co	1	257	000000000000000000070000000000000000800000000000000000000000000000000080000100000000000000000000001000000008000000000010700000000000000000000000800000000700000070001001000000000000000009000000000000700000000000000087000000000000700000000000000000010000100000000000000000000000000000000000900000000000000000000000000000000100000000700000000000000000008010000100000000000000000000000008000070000000000…	TCGA-NORMAL	0.0003529	112
CDCA5	KIF2C	0.8786	co	1	618	000000110100011001000010101011110000001100010010100010001010101101011011111110010100110100010100111011100001000001110080110000011100110010010101011000100100001000100000101001100010001019100101000100001000100010100100010000000101010100010000000011000000110001110110100110100000100101000100101110000101100101100011000000010110000100000100000100001100110110101110100101001101011001000010011000001001011…	GTEx_normal	0.000985	112
IFI16	RCSD1	0.6384	co	1	67	000010000000000710001000000000000000000000000000011000000000001000000170001000010000000000801000010000000000000100000070001000070000010000000000000000000000000000700000000010000000000009000000100000000000000000001000000000000000000001001001101000001000000001001010007100010001100000007000100000000000107100000000000010000001000000000000000000000007000000100000000000010000100100000000000011000000100…	TCGA-LUAD	1.833e-06	112
SEMA6A	STARD8	0.6386	co	1	573	111111111111011011111111111111111111111111011110118001111111111111111101111011111111111101018111111111110111110110101801111111111111111811110110811111001111101111111111101111111111111119111111011111011111111011110111111111101110111111111111810001111111010111111110110111111111111111111011011111011111111100111111111110111011111110001101118101111111111001111111111111111111111011111111111101111110011…	TCGA-LUAD	1.071e-05	112
ABI3BP	NRN1	0.6398	co	1	569	111111111110101110111101011111110101101101011110100101111111111111111111111001111000101101010100111011011111001010101081101111110100111101811101011111101111011011111110011111111111101109011111111111010010111101110110101011011110010111111111101100111111010101011101111111111111111111111011011111110110101111111110101110110110111100111000101110010000111101111111111101011110110011101111111111110111111…	TCGA-LUAD	0.0008554	113
KIAA1324L	MFSD2A	0.6575	co	1	278	000000000000000000070000000000000000800000000000000000000000100000000080000100000000000800010000001000000008000000010070700000000000000000000000800000800700000070008000000080000000000009000000080000700000000000000087000000000000700000000080800010000000000000080800000000000000000000000000900000008000000000000000000000000000000000700000000000000000008000000100000000000000000000000008700070000000000…	TCGA-NORMAL	0.0003529	113
TOP2A	NCAPG	0.8781	co	1	572	000000010000011001000010001110010000000100010018100010001010101101011001011110000100100100010100111000100001000000110000110000011100010010010100011000100000000000100000100001000000001009000001000100001000100000000100000000000101010100010000000011010000110000110110100110100000100101000110901010000101100100000001000000110000000100000100000100001100010110100110000101001001011001010010011000001000011…	GTEx_normal	0.0002592	113
CEP55	BUB1B	0.8784	co	1	647	010000110000111001000010101110010001000000010010101010001010101101011101111110010100111100010110111011100001110000110000110000011100111010010101011000100100001000101110101001101100001009100100000100001001100110100100010000000101010100010000000011110000110010110110100110100001100101000100901010000101110100000011010000110010111100000111000100001100110110101110000101001001011001010010011000011000011…	GTEx_normal	0.000985	113
KANK2	LMO2	0.6765	co	1	73	100000000000000000000000000000000000010000000000000000000000000000000000000000000000000000108000000000000000000000000000000000000000000000000000000000000000000000000000000000000000000009000000000000000000001000000000000000000000000000000000000000000000000000000000000000000000000000000001000000000000000000000000000000000000000000100000000000000000000000000000000000000000000000000010000000000000000…	TCGA-LUSC	6.175e-06	113
SH2D3C	EPS15	0.6361	co	1	35	000000000000000100000000000000000000101000000000000000000000000000108000000000000001000010001000000000000000000000000010000000000000000000017001000000000000000000000000010000000000000009000000000001100000000000000000001000000010000000000000000000000000000000000000000000011000001000000000700000000000000007000000000000010000000000000000010000000000000000000000100000000000000000000000000000700001000…	TCGA-LUAD	1.833e-06	113
TACSTD2	ADRB2	0.6565	co	1	355	000000000000000000000000000000000000000000000007000710000000000000000000000000000000000000700000080000000000000000010080000000700000000000007001000000000000000000000000000000000000000709000000010000000000000000007000000000000000000000000000700010000000007000000000000000000000000008009100700000000000070007070017000070000000000000000000000000000000000000001007000080000070700700000000000000000008000…	TCGA-NORMAL	0.0003529	114
ASPM	TOP2A	0.8779	co	1	575	000000110000011001000010001110010000000100010010100010001010101101011001011110000100100100010100111000100001000000010000010000001100010000010100001000100000001000100000100001000000001009000000000100001000100010000100010000000101010100010000000011010000110010110110100110100000100101000100901010000101100100000001000000100010100100000100000100001100010110101110000101001001011001010010011000000000011…	GTEx_normal	0.0002592	114
LDB2	ITGA1	0.6355	co	1	96	100000000111100000000000000000001000101000001000100001001000100000110101000000000001000000100000001110000000000101000100001001000000100010101007000010100110001000001100010001000000000009000000010000010000000000000000000000000010000000100000000000000000000000100000000001000000010000000000810100000000000011000000000000110000001000000001001000000011000800000000100000000000000000000100000000000001000…	TCGA-LUAD	2.635e-07	114
JARID2	DSP	0.6787	co	1	707	000011101010101111111101000000100011111110110001010101110011001100010101110001101101000011800011101111011110011101000010010111101001010001100010001110011101110100100001010000011110100119001111110011110110100000001001000101811000111011011111108100101000018100000011011000001110011000008010711000101011001018011100001111010101000011000010111101001101111101110011010010100100111100111101110001110100110…	TCGA-LUSC	0.0005608	114
ACVRL1	KCTD15	0.6346	co	1	410	110110111000010011001111011111101111101111101111111101111010111010100101100011101111111101000111101111110010110111101101011111001111000101111010011110011101001101111010111101111111011119110111001111010001111011010111111011001180110011111100111000111101010111111101111111011101010011111011011110111101011011011110111111110110110010001010001111011117111001110111101001111100111018101111111101001011011…	TCGA-LUAD	3.122e-08	115
MELK	MKI67	0.8778	co	1	575	000000110000011001000010001010010000000000010010100010001010101101011101011110000100100100010100111000100001100000010000110000011100110010000100011000100100001000100000100001000000001009100100000100001000100010000100010000000101810100010000000011010000110000110110100110100000100101000100801010000001100100000011000000110010000100000100000100001100010110100110100100001001011001010010011000001000011…	GTEx_normal	0.0002592	115
KIF20A	KIF11	0.8779	co	1	596	000000110000011001000110001010010000000000010010100010001010101101011001011110000100101100810100111000100001100000110001110000001100010010010100011000100100001000100100100001001000001009100000000100001001100110100100010000000101010100010000000011010000110010100100100110100001100101000100901010000101110100000011000000110010000100000100000100001100110110101110000101001001011001010010001000001000011…	GTEx_normal	0.000985	115
PINK1	C14orf132	0.6564	co	1	342	000000010000000000000000000000000000000000000000000010000000000000000000000110000100000000100000000000000000000000000000000000001000000000007000000000000000000000000000000008081000000009000000000000001001000000000008000000000001000000000000001000000000000000000000000000001000100000000100700010000000000000000001008000010000000010000000000000000000000010000000000000000000100800000000000000000000000…	TCGA-NORMAL	0.0003529	115
RFC4	TBCCD1	0.675	co	1	555	101001000010100110001000000000000010110001000000010100000000000010100000000000000001000010101000000000001000001100000110000000000011000000000011100100001001010110010000000010010000010007000000100000110100011000001000001000100000101001100000101000001101001100000000000000001100000010110001700001110010001001011000000010000001010001010000110010000000000000000000101000100000100100000100000000110101100…	TCGA-LUSC	1.012e-06	115
GPR116	DLL4	0.6743	co	1	538	100101001000100110101000010000000001100000100000000100000001000000110000000000110001000011001000000000081100001100001010001010000010000080101010100100001100010110010000010010010001000009001010100000100100000000008010001000000000101001100010801000000111000000001000000000000010000110000000900001000000000000000100000010001000011001111000010000000001001000000000011000100000000100100010000000100000000…	TCGA-LUSC	1.012e-06	116
TROAP	MELK	0.8777	co	1	638	010000110100011001000010101110110000000100010010100010001010101101011111111110010100110100010100111111100001110001110000110000011100111010010101011000101100001000100001101001101100001009100100000100001000100110100100110011010101810100010000000011110000110000110110100111100001111101000100801110000101100100100011000000110010110100000101000110001100010110101110100101001101011001010000011100001000011…	GTEx_normal	0.000985	116
RP11-144F15.1	SMCP	-0.6733	co	1	41	999999999999999999999999999999999999999999999999999999909999999999999999999999999999999999999999999999999999999999999999999999999999999999999999999999999999999999999999999999999999999999999999999999999999999999999999999999999999999999999999099999999999999999999999999999999999999999999999999999999999999999999999999999999999999999999999999999999999999999999999999999999999999999999999999991999999999…	TCGA-LUSC	1.579e-08	116
ITGB4	EXO1	-0.6347	co	1	365	101000111100011010001111100101001111001111010101011100110011010100010011181001011110011081108011100111100110010011100011101000101101111101008010110111110100101100011111101110100111010109100101101101000011111000101001010110101110100000101001011001111110111001111101111181111101011110101011011001811100110001110010111181111101100110000010110111101111000011010001101010011101100111801010010111011101010…	TCGA-LUAD	1.833e-06	116
FMO5	CAT	0.6562	co	1	345	000000000000000000000000000000000000000000000000000010000000000000000000000110001000000000000000000000000000000000000000000000000000010000010100000000000000000000000001000000000000000009000000000000000001000000000000000000000000000000000000000010000000100000000000000000000000000000000100900000000000000000000000000000000000000000000000000000000000000000000000000000000000000000000000000000000000000…	TCGA-NORMAL	0.0003529	116
BIRC5	TROAP	0.6778	co	2	747	101111001011100110111001010001001110110011101101011101010101010010100100000001101011001011101011000001011110001110001110001111100011000001101010100111010111110110011010010110010000110109011011110011110110011001011011001100001000101011101111111100001111001100001001011000011110000010011011800001101010011010111100111111001001001011011010111001110011001001010001011010110010100110101101100011100111100…	TCGA-LUSC	0.0005608	116
CCNB1	WDR76	-0.6757	co	1	54	000000000000000000000000000000000000000000000000000000000000000000000000000000000000000000000000000000000000100001000000000000000000000000000000000000000000000000000000000000000000000009000000000000000000000000000000000000000000000000000000001000000000000010000000000000000000000000000000700000000000000000000000000000000000001000000000000000000000000000000000000000000000000000000000000000000000000…	TCGA-LUSC	0.0001439	117
CCNB1	CDC20	0.8772	co	1	561	000000110000011001000100101010010000000000010010100010001010101101011101011110000100100100010100111010100001000000110080010000001100010010010101011000800000001000100000100001000000001009100000000100001001100000100100010000000101010100010000000011000000110011110110100110100000100001000100701010000801100100000011000000010000100100000100000100001100010110101110800101001101011001000000001000001000001…	GTEx_normal	0.0002592	117
EFS	JAM3	0.6343	co	1	199	100111001011100000100000010000010100101000011000000101000100101100101101000000100010111000000000010000000101110100000001010000000000110100801101001011001000000010110000010000000010110009011010010101010100010001018000101010010100111001010011100000000011007000001100101100010010000000010000011101000000100000001110001000000100110000110000101100010108001000010110010000100001000010000010010110000111000…	TCGA-LUAD	2.635e-07	117
TOP2A	CDCA5	0.8773	co	1	593	010000110000011001000010101010110001001100010010100010001010101101011011011110000100100100010100111010100001000001010000110000011100110010010101011000100100001000100000101001100010001019100101000100001000100010000100010000000101010100010000000011010000110000110110100110100000100101000100901010000101100100000011000000110010000100000100000100001100010110101110100101001101011001000010011000000001011…	GTEx_normal	0.000985	117
ASPM	HJURP	0.8773	co	1	615	010010110100011001000110101111110000000100010010101010101010101101011001011110010100110100010100111110100001000000110000110000011100110010010101011000100100001000100010101001000000001019100100000100001000100010100100010000000101010100010000000011010000110010110110100111100001100101000100101010000101100100000011000000110110100100000100000100001100010110101110100101001001011001010000011000001000011…	GTEx_normal	0.000985	117
LIMS2	ILVBL	-0.6357	co	1	93	000100001000100110001000000000010010107000000001010000000000000000000010000001000001000000000010000000010000000000000010000000000000000000101118700100000000070000000000010100010000000009000010000008110000011000000001000100000070010008000080100000000001001000000010000000001010000000000000700000000000000007000100000000010000000071700000010070000001000000000001800000000000000000000000000000100101000…	TCGA-LUAD	0.0008554	117
ALDH5A1	CAT	0.6559	co	1	333	000000000000000000000000000000000000000000000000000010000000000000000000000110001000000000007000000000000000000000000000000700000000000000010000000000000000000000000001000000070000000009000000000000000000000000000000001000000000000000000000000010000000000000000000000001000000000000000100900000700000000000000000000000000000000000000000000000000000000000000700000000000000000000000000000070000000000…	TCGA-NORMAL	0.0003529	117
SRPK1	HIF1A	0.6553	co	1	328	000000000000000000000000000000000000000000000000000010000000000000010000000010000007000000000000000000000000000000010080000000000070000000010000000000007000000000000000000000000000000000070000000000000000000000000000000000700000000000000000000010000000000000000000000000000000000000000100000000000000000000000000000000000000000000000000000000000000000010000000700100000000000000000000000000000000000…	TCGA-NORMAL	0.0003529	118
EFS	UBE2C	-0.6335	co	1	328	110111101111110000110010110101100118101000001000101101000110010010110010000100110110111000000110000118111100010101111001110010011001001111101011010011101111011000010101111001110111110019111110010101010111111111111000011110010000111011000011100101110111001001011010011001110011001000110010011101010100000001001110011100100110111110110011101000011011101001111000011011101100000010011110000110001111110…	TCGA-LUAD	2.635e-07	118
LRRK2	PRKCQ	0.6553	co	1	307	000000000000000000000000000000000001000000000000008010000100000000000000000100000000000100008000001000000000000000000000000000000000000000000000000000000000000000000011000000000000000009000000000000001010000000000000000000000000000000000000000000100000100000017000000000000000000000007100000000000000000001000000000000000000000000000000000000000010000010000000000010000000000000000000000000000000000…	TCGA-NORMAL	0.0003529	118
S1PR1	GHR	0.6346	co	1	639	111111111111111111111111111111111111101101111110111101111101111111111111111001111011111181011111111111011111111111101111111111111111110111111111111111111111111111110111111101111111111119111111111111111110111111010110011111111111811111111111110111111111011111101111111110111111110111101011011111111111111111111118111111111111010111111111111111111111111111111111111101111111111111111111111011111111111…	TCGA-LUAD	5.334e-05	118
FOXF1	LAD1	-0.6352	co	1	90	101000000000000000001000000000000010101000000001000100000000000000000000000000000000000000101000000000010100000000000010000000000000000000107010100100000000700000000000000010000000000009000000100001000000000000001000000000000000000001000000110000001000001000001100000000011000000000000001000000001100010001000001010010000000000000000000010000000010000000000001100000000000000100001000000000000001000…	TCGA-LUAD	0.0008554	118
BIRC5	KIF11	0.8771	co	1	616	000000111000011001000110100010010001000100010010100010001010101101011011011110000100110100010100111010100001100000110000110000011100110010010101011000100100001000100100100001100000001019100100000100001001100110100100110000100101010100010000000011110000110011110110100110100001100101000100001010000101100100000011000000110110110100000100000100001100110110101110100101001001011001010010011000011000011…	GTEx_normal	0.000985	118
NUF2	CCNB2	0.877	co	1	596	010000110000011001000010101010010000000000010010100010101010101101011001011110000100100100018100111110100001000001110000110000011100110010010101011000100100001000100000100001000000001009000000000100001001100100100100010000000101010100010000000011010000110010110110100110100000100001000100101010000001100100000011000000110010100100000100000100001100010110101110000101001001011001010010011100000000011…	GTEx_normal	0.0002592	118
SH2D3C	CDH6	0.6758	co	1	100	000000000000000000000000000000000000071000000000000000000010000000010000010000000001000000011000000000000000000100000010000000000000000000001001000000000100010000000000070070000000000009000000000000110000000000001007001000000000000000000000011000000000000000000000000000001000000000000000100000000000000001000000000000010000000000000000000070000000000000000000100000000000000100000000000000000000000…	TCGA-LUSC	0.0005608	118
NRN1	STARD8	0.6341	co	1	621	011111111110111811111101111111111101101111011110100101111111111111111111111011111101101101010100111011111111011010101011101111111110111101011101111111101110011011111111111100111111111119111111111111011010111101110110111011111111011111111111101100111111010101010101111111111111111111111011011111110010101111111110111110110110111100111000101110010000111111111111111111011110111011101111111111111111111…	TCGA-LUAD	0.0008554	119
ANLN	KIF2C	0.8769	co	1	587	100000110000011001000010101010110000000100010010100010001010101101011011011110010100100100010100011010100001000000010080010000011100110010010101011000100100081000100000100001080010001009000000000100001000100010100100010000000101010100010000000011100000100000010100100110100000100101080100801010000101100100000011000000010000000100000100000100001100110110101110100101000001011001000810011000001000001…	GTEx_normal	0.0002592	119
KIAA1324L	ESYT3	0.6551	co	1	351	000000000000000001070000000000000000800000000000000010000000100000000080000100000000000100010000001000000008000000010010700000000000000800000000800000000700000070001001000000000000000009000000000000700000100000000087000000000000700100000080000010010000100000000000010000000000000000000000700000000000000000000080000000000100000000700000000000000000008010100100000010000000000000000008000070000001000…	TCGA-NORMAL	0.0003529	119
CDC45	FOXQ1	-0.633	co	1	462	111110111111111810011111101001100111701111110101111100110010101100110111101101010111110110109111100111110111110011111191111010010111111011019070100101111100701101100111111011101111011119100111711111001011111110111101110710011110010117011110110001111110111001110111117111111001111100101011011100717111110111110010111111101101101110010011171011101011100011111107101011101111100701711010111111011111011…	TCGA-LUAD	5.334e-05	119
DLC1	PNMA2	0.6729	co	1	604	101101101010110100001101000001000010100010101000011100010001010010110100000001000001000010100000000000081100101110100000100100001011000001000010000101000100011111000000100011010001010008001000000001110100111010000011000000011000101010100180101101001011001110000001010000000000000010010011001010010010000000001100011100001001000011111001100000000000001000000001011000111000100000011110100100100100110…	TCGA-LUSC	3.211e-05	119
DUOX1	ZWINT	-0.6307	co	1	246	100110001101100001000101100001001001100100000118011000101010100100010000000000000101000100107001000111000001100010101070101110000017101001011010011100000100011111110000000071000101000109101010100001100100011110100011011111000000110001000000011001000101011000100010010100011001000100111001910001711101011001001711011010110001011100100001000001011001011001000101101000001111100111111100700010000101010…	TCGA-LUAD	2.635e-07	120
KIF2C	MELK	0.8767	co	1	619	000000110100011001000010101010110000000100010010100010001010101101011101111110010100100100010100111011100001100000010080110000011100110010010101011000100100001000100000101001100010001009100100000100001000100110100100110000000101810100010000000011100000110000110110100110100000110101000100801010000101100100100011000000110110010100000100000100001100010110101110100101001001011001000010011000001000011…	GTEx_normal	0.000985	120
DUOXA1	CPM	0.6549	co	1	338	000800110000000000000000000000017000000008000000008010000000001000000000000110000000000000007000000000000000000000000090080000010107000000007000000000000000000080000000001070000000001000000000008000701801000000000008000000000101000000000000000010100007100000000000100000070000100000080100100010700000100100000700098080000000000000080000000117000000000110100000007000000070711070708000811070001000000…	TCGA-NORMAL	0.0003529	120
DLC1	ADAMTS12	0.6732	co	1	628	101101001011100110111001010801001001100100101001010000110001010000170100010000100001000010001001000810011100101101001000100111070011000001001010100110000100011111010000010011010001000009001010001100110100011100101011001001011000101011100010101001001001001010101000011000101010000110110011010001111000010001011100110011001001011011111001111001000001001000000001111000001000100110111100100000100100100…	TCGA-LUSC	0.0001439	120
TUBGCP4	BUB1B	0.6741	co	1	706	101101001011000110111101010000001110111011101101010101010101010010100010000001101011000011101000000000011110001111001110001111100011000001101010100110011011110118080001010110010001110109011010110011110110011081011011001101111000101011101111111100001111001110001001000000011110010010111011700101111010001011111100001111001101000801111000111001000011001001010001011010110100100110101101100011100111100…	TCGA-LUSC	0.0005608	120
VPS13C	SPOCK2	0.631	co	2	54	000000000000100100000000000000000000101000000000000000000000000001000000000000000100000000001000000000000100000000000100080000000000001000101001000000000001000000000000000000000000000009000000000001100000000000100000100000000010000001000000000000000100000000000000000000010001001000001000800000100000000001000000000000010000001000000000000000000000000000000007700000000000000000000000000000000007000…	TCGA-LUAD	1.833e-06	120
SASH1	RFC4	-0.6328	co	1	454	110110011101111001010110111011111181001100011010101010111110111101011111111111110100110180810111111111100101110011111001110001811100111111810100011001110100111010111110111001111111101087111101011111001011100111110111111110010101010118011110010111110001110001111111111111110001111101001100811111000101110110100010111081110110101100101101001101111100111110110110000101001111111011011011111111001000011…	TCGA-LUAD	5.334e-05	120
NCAPG	MKI67	0.8766	co	1	613	000000110000011001000110101110010000000100010018100010101010101101011011011110000100101100010100111000100001100001110001110000011100110010010100011000100100000000100100100081001000001019100101000100001001100010100100010010000101010100010000000011110000110000118100100111100001100101000111901010000101110100000001000000110010000100000100000100001100010110101110000101001001011001010010011010001000011…	GTEx_normal	0.000985	121
PIP5K1B	LAMP3	0.6548	co	1	285	000000000000000000000000000000000000800000000000000010000000000000000000000100000000000000000000000000000000000000010000000000000000000000000000000000000000000000000001001000000000000009000008700000001000000000000000000000000000000000000000900000000000100000000800000000000000000000000000900010000000000000000000000000000000000000000000000000000000000110000000000000000000000000070000000000000000000…	TCGA-NORMAL	0.0003529	121
MAGEA9B	AC091801.1	0.6708	co	1	81	999991999999999999999999999999999999919999999999999999919999999999999999999999999999999999999999999999991999991991999999999999999999999999999999999999999999999999999999999999999999999999999999999999999999999999991999999999999999999999099999999999990999999999999999919999999999999999999911999990999999999999999999979999999999999999909999999999999999999999999999999999999999999999091999999991199999999…	TCGA-LUSC	1.012e-06	121
TOR4A	MYO1G	0.6698	co	1	286	000000000000000010000000000000000010001000000001010000000000000000000000000001000000000010008000000000010000000000000800000000000000000000000000000000000000000000000000000010000000000009000000000000000000000000000000000100100010000001000001000000000000000000000000001000010000000000000000000000001000000008010000000110010000000000000000010011000001000000000000801000000000000100100000000000000000000…	TCGA-LUSC	1.579e-08	121
LDB2	BAALC	0.6319	co	2	433	110111010111110101111110011001101101100110110110000000010111101101101111010000101101111181110100111011001111101100101011110110011010111110010100111110101011010010111110181101111011801109111110011010010100110101110810111011111100811111010101810100010010011111011110110111010011001000010010011110000011108001111111111000111110111010010101100100011110001001100100011000111118000011180100101100110110110…	TCGA-LUAD	5.334e-05	121
GPR116	KDR	0.6708	co	1	555	100101001010100110100000000000000001000000100000010100000000000000010010000000110000000011101000000000081100001100001010000010000011000000101010100000001000010110010000010010010000000109001010100000110100000000001010001000010000101018000010101000001011000000001800001000000010000110000010110001100000100000000100000010001008011001111000000001000001001000000000010000000000000100110081000010100000100…	TCGA-LUSC	6.175e-06	122
SLC16A1	CTHRC1	0.6256	co	1	309	111010011101011011111111011111111101001100100101101000001011110100010110101101111100101001011111110101001010110011101181111101081110000111101000001000010110101001110110100101101101100109110011101011010001011010100000000110001010010101111100010101110110010111101001010100110101001111100001800101111111110111110010011111111011011110001110001001111008100001010001811001011111000011011001010010010001111…	TCGA-LUAD	2.171e-10	122
TRIP10	CAT	-0.6543	co	1	336	000000000000000000000000000000000000000000000000000010000000000000000000000010001000000000000000000000000000000000010000000000000000000000017000000000000000000000000001000000000000000009000000000000001001000000000000001000000000000000000000000010007000000000000000000011000000000000000000700000000000000000000000000000000000000000000000000000000000000000000000000000000000700000000000000000000000000…	TCGA-NORMAL	0.0003529	122
NUSAP1	CDCA5	0.8764	co	1	606	010000111000011001000010101011110001000100010010100010001010101101011011111110000100111100010100111010100001010001110000110000011100110010010101011000100100001000100000101001101000001019100101000100001000100010000100010000000101010100010000000011010000110001110100100110100000100101000100801010000101100101100011000000110110001100000100000100001100010110101110000101001101011001010010011000010800011…	GTEx_normal	0.000985	122
NUF2	TPX2	0.8763	co	1	599	010000110100011001000010101010110000000100010010100010001010101101011001011110000100110100010100111010100001000000010080110000011100110010010101011000100100001000100000101001001000001009100000000100001000100010100100010000000101010100010000000011110000110010110110100110100000110101000100101010000101100100000011000000110010100100000100000100001100010110101110100101001001011001000010011000001000011…	GTEx_normal	0.0002592	122
PAICS	IARS	0.6539	co	1	316	000000000000000000000000000000000000000008000008000010000000000000000000000000000000000000000000000000000000000000010000000000000000000000007008000000000000000000000000000000000000000009000000000000000800800000000000000000000101000000000000000010000000000000000000000000000000000001000000900010000000000000000000000000000000000000000100700000000000000000000000700100000000000000000010000000000007000…	TCGA-NORMAL	0.0003529	123
KIF11	UBE2C	0.8763	co	1	613	000000110000011001000010181110110001000000010010101010001010101101011111111110000100100100010100111011100001100001010000100080001100110010010101011000100100001010100100100001100100001009100100000100001011100010100100110000000101810100010000000011010000110000110110101110100001100101000100801010000101100100000011000000110080000100000101000100001100010180101110100101001001111001000010011100001000011…	GTEx_normal	0.000985	123
CLEC1A	NRN1	0.6288	co	1	516	011111111110100111111101110100110101101101010110180100111111111111111111111011111100101101818100111011011111011010101011101111110110111101018108011111101110011011111110011100111011111109011111111111010000111101110110111011011110011111111111101100011111000101011101011111111111111111111011011111110110111111111110101110100800111100111000101100010000111101111111811001011110111011001011111111110111111…	TCGA-LUAD	5.334e-05	123
KCNJ9	CCDC166	-0.6722	co	1	32	999999999999999919999999999999999999999999999999999999999999999999999999999999999999999999999999999999999999999799999999999999999999999999999999999999999999999999999999999999999999999999999999999999999999999999999999999999999999999999999919999999999999999999999999999999999999999999999991999999999999999999999999999999999999999999999999099999999999990999999999999999099999199999919999999990999999999…	TCGA-LUSC	0.0001439	123
CD93	NRN1	0.6306	co	1	585	011111111110111111111101111110111101801101011110100100011111111111111111111011111101101101018100111001111111011011101011101111111110111101001101011111101110011111110110111101111111111117011111111111011000111111110110111011011111011111111111101100111111010101011101111111111111111101111011011111110010101111111110111110110110111100111010101110010000111101111111111000011110111011101111011111110111111…	TCGA-LUAD	0.0008554	124
HSPB2	EFS	0.6285	co	1	333	100111001011111000110000010000011110101000011000000101001100101100101111001000100010111000810000111100181101110100001001110010000001110101801111001011101010001000100000011000010011111019011110010101011100010001011108110110010181111011010011100110110111101001101100101111010011000001010110011111000000100000001110011000010110111000110110101100010188101011010110110111101101110010010010010110001111000…	TCGA-LUAD	5.334e-05	124
SASH3	TESC	0.6726	co	1	662	000010000000000800000000110000000111110111000100000000000001000000100000000100101001011000710000000000000000001000001110000100080010000110000010100100100010010000000111000011010000100009000000000001010101001000110010000001101010101090000000111000000000011000000001000000010101001100018000000000000000011001011101001100001001100101001000110010000000000001000100100010100010000110110100000000100100000…	TCGA-LUSC	0.0005608	124
LIPH	LRRK2	0.6535	co	1	322	000000000000001000000000001000000001000000000000000010000000101001000000000100000000000100010000000010000000000000000000000000000007001000000001010000000010000700000011000000000000100709000000000000000010000000000000100000000010000100000000017010000000100000010100000000000000100000000100000010000000000000000000000070000000000000000000000000000010000010000000000000000001000000000000001000001000000…	TCGA-NORMAL	0.0003529	124
LIMS2	GHR	0.6276	co	1	536	111111111111111110111111010111110111800101111110111101010101111111101111111101111010111111011111100101111111101111101111108111111111111111818110011011111111111111110111111101111111011109111111101101110110111110110110011111111100811011111111011101111111000101011111111110111111110111101011011111111111111118110110111111101110011110101001011001111011101101111011811011111011111101011181111011110108111…	TCGA-LUAD	1.071e-05	124
KIFC1	KIF11	0.8761	co	1	591	000000110800011001000010001010110000000100010010100010001010101101011001011110010100110100810100111010100001100010010081110000001100110010010101011000100100001000100100100001101000001009100000000100001000100010100100010000100101010100010000000011110000110000110100100110100001100101000100801010000101110101000011000000110010001100000100000180001100110110101110100101001101011001000010001000001000011…	GTEx_normal	0.000985	124
HCK	TNFAIP8L2	0.6693	co	1	171	000000000000000700000000000000000000000000000000000000000000000000000000000000000001000000708000000000000700000000000000000000070000000000000000000000000000000000000000000000000000000009000000000000700000000000000000000000000000000007000000000000000000000000000000000000000001000000007000900000800000000000000000000000000000000007000000000000000007000000000000000000001000000100000000000000100000000…	TCGA-LUSC	6.175e-06	125
KIAA1324L	MTUS1	0.6531	co	1	244	000000000000000007070000000000000000800000000000000000000000000000000080000100000000000000000000000000000008000000000000700000800000000000000070800000000700000070001000000000000000000009000000000000700800000000000087000000700000700000000000000000010000000000000000000000000000000000007000700000000000000000000000000000000000000000700000000000000000007000100000000000000000000700000008000070000000000…	TCGA-NORMAL	0.0003529	125
CDCA8	MYBL2	0.8759	co	1	608	010000110100011001000000101010010000001100010010100010001010101101011101111110010100110100010100111010100001100000010000110000011100110010010181011000100100001000100000101001100000001009100100000100001000100000000100110000000101010100010000000011000000110000110110100111100000110101000100801110000101100101000011000000010100100100000100000100001100110110101110100101801101011001000010011000001001011…	GTEx_normal	0.000985	125
KIAA1524	TTK	0.6722	co	2	731	101101001010100110101001010000001110110011101101010101010001000010100000100001101001000011101010000000011110011100001110000110100011000000101010100111011010110111010010010110010000110119011010100011110110011001011011001101101010101011100111101100001111001100001001010000011110001010110011010101111010011011111100011111000001010011111001101011000011001001000001111010110000100110101101100001100111100…	TCGA-LUSC	0.0005608	125
SGOL1	TMPRSS4	-0.627	co	1	481	111100110111111101010011111111101111011101010011111101111111011101010111011000111100111181110110110111100100110101101080111001111101111111011111011011010100101100111111101111101101001019101111001101101111100110101100010080101100110100010101000001111110101111110111100110111001111101000010911110010101111111100010110000111111101111100111000100111111101110101110100111011111811101810111111110001111111…	TCGA-LUAD	5.334e-05	125
DLGAP5	DEPDC1B	0.8757	co	1	591	000000110000011001000010001010010000000100010010100010001010101101011001011110000100100100810100111010100001100000110081100000011100110010010100011000100100001000100100000001000001001019000001000000001001100000100100010000000101010100010000010011010000110011110110100110100000100101000100900010000101100100000011000000111010000100000100000100001100010110101110000101001101011801010010011000011000011…	GTEx_normal	0.0002592	125
BIRC5	MYBL2	0.8759	co	1	612	000000110100011001000010108010010000001100010010100010001010101101011811111110010100110100010100111010100001100000110000110000011100110010010101011000100100001000100000101001100000001019100100000100001000100000100100110000000101010100010000000011110000110001110110100118100000111101000100801110000101100101000011000000110100110100000100000100001100110110101110100101801101011001000010011100000000011…	GTEx_normal	0.000985	125
ORC6	GHR	-0.6257	co	1	576	111111111111111111111111111111111111101101111110101100110101110111111111101101111111111111011111110111111111111111110111111001011100111111111111011101111111111011110111111101111111111109111111111111101110110111110110011111111111111001011111110111111011110110111111111101111111111101101011011111111111111111110110111111111111111110101111110111111111111111101111111101111111011001111111011111110100111…	TCGA-LUAD	1.071e-05	125
SDR9C7	CRCT1	0.6677	co	1	486	999999999999119999999919999999999999999991991999999999999991999999999999999919199999199919999999999999999999991999999999999999999999999999999919999999999999999999991999999999119999999919991999999999991999999999999999999991199999999999999911999999999991999999999999919999999999999999919999999999999919999999999999999999999999999999919199999919999999991999199999991999999999999999999911999999999999999…	TCGA-LUSC	1.012e-06	126
ABCA3	EHF	0.653	co	1	281	000070000000000001000000000000000000000000700000000000000000000001000000000100000000000070000000000000000000000000000070000000000000000000000007000000000000000000070001100000000000000009000000000000001000000000007000000000700000000000000000000010100010107000000100000000000000100000000100900010000000000100000010000070000100000000000000000000001000000010000000000000000000001000000000001000001000000…	TCGA-NORMAL	0.0003529	126
NFE2L2	AURKB	-0.6247	co	1	548	111110101111111100011110110101101001111111111101011001110110110110110111101101110111111111101100100111111010110010111111111111111111111111101011110111101111101111011111111110111111111119111111811101101011111111111011111111111110111001111111111111111111101111111011111001101111011110111111811101111111110111011111111181001110111110111111111001011111100011111101011011111111100111111111011111011111010…	TCGA-LUAD	1.071e-05	126
RFC4	UBXN7	0.6719	co	1	702	101101101011100110101001010100000011110011001101010101010001800010100000000001101011001011108000000000001110001100000111001111100011001000101011100110001011010100010101000180110100110117001010110011110100011101101000001001111010101011100111101000001010001110000001011000011110011010110011710001011010011001111100000110011001011011011011111011000011001001001001111010110010000110100100000101110111100…	TCGA-LUSC	0.0005608	126
ASPM	BUB1B	0.8757	co	1	610	000000110100011001000010101110010000000100010010101010001010101101011001011110000100100100010100111010100001000000110000110000011100110010010100011000100100001000100000101001001100001019100000000100001001100110100100010000000101010100010000000011010000110010110100100111100000100101000100101010000101110100000011000000110010100100000100000100001100010110101110000101001001011001010010011000001000011…	GTEx_normal	0.000985	126
CEP55	ANLN	0.8756	co	1	574	000000110000011001000010001010010000000000010010100010001010101101011011011110010000100100010100111000100001000000010000010000011100110010010100011000100100001000100000100001080000001009000000000100001000100010100100010000000101010100010000000011010000100000010100100110100000100101080100901010000101000100000011000000010100100100000100000100001100110110108110000101001001011001000810011000011000011…	GTEx_normal	0.0002592	126
SRPK1	ERO1L	0.6528	co	1	339	000000000000000000000000000000000000000000000000000010000000000000000000000010000008000000000000000000000000000000010080000000000080000000000000000000000000000000000000000000000000000000000000000000000000000000000000000000000001000000000000000010000000000000000000000000000000000000000100000000000000000000000001000000000000000000000000000000000000000000000000000100000000000000000000000000000000000…	TCGA-NORMAL	0.0003529	127
CNRIP1	SLC16A4	0.6671	co	1	493	000100100100000010000100000000001110111011100001010100001000100001100100000000000000000000801000100000010000100000000011000000001001000000000000000000110000000101800010000010010000110009010000000011000100001001011011000000110000101001000001001000000001000000000000800000001001001001011011010000001000000000101100001110001000000101000010010801000000100001000001001000100000100100101000001001100010000…	TCGA-LUSC	6.175e-06	127
CCNB2	ANLN	0.8751	co	1	585	000000110000011001000010101010010001000000010010100010101010101101011001011110010000100100018100011010100001000000010000010000011100110010010100011000100100081000101000100001080000001009000000000100001000100110100100010000000101010100010000000011110000180010110100100110100000100101080100800010000001100100000011000000110110000100000100000100001100110110100110000101001001011001010810011000001000001…	GTEx_normal	0.0002592	127
CDC45	UFD1L	0.6705	co	1	717	101001000001000710101000010001001010110011101101011101000101010010100100000001101001001011101010000000011110011110001110001111100011001101101011100111010011010111011001000110010111110109011000110000110110011001011011001101001010101011101111101100011011001110001001000001001110010010011001800001111010011011011100110011000001010001111011111001010011001000011001011000110010100110111101100011110110100…	TCGA-LUSC	0.0005608	127
RAI2	MCC	0.6243	co	1	505	111001101101011111111111111111111111801111100101111100110111111110101111101101110110111011007111110111011111110011101101111011181011111101118110111111110110101111111111111111101111111119111011111111000011111101011111111111111011111111111101810111111110010111011011111110111110101011101011810111811111111010110010111111101111111110111001111101111118111101111011011111111111110111111011111181111118111…	TCGA-LUAD	1.833e-06	127
CEP55	KIF20A	0.8751	co	1	565	000000110000011001000010001010010000000000010010100010001010101101011001011010000100100100810100111000100001100000010000110000001100010010010101011000100000001000100000000001001000001009000000000100001001100110800100010000000101010100010000000011010000110010100100100110100000100101000100901010000101000100000011000000010010100100000100000100001100110110101110000101001001011001000010008000000000011…	GTEx_normal	0.0002592	127
NRN1	CYYR1	0.625	co	1	566	111111111110100111111101111010110101101101010110100100111111111111111111111001111100101101011100111011001111111010101011101101111100111101011101001111101110110011110110011110111111111109011111111111011000111101110110111011011010011111111111101100011111010101011801111111111111111111111011811111110110111111111110101110110110111100111010101100010000111111111111111001011110101011101111111111110111111…	TCGA-LUAD	0.0008554	128
NKX2-1	KCNK3	0.6663	co	1	550	100801001000100100000000000000000000800000011000000100000000000000810000000000000000000010800000000000000100001100000000000000000010000000000000100000001000010010000000011000010010010019001010000100100100800010000009001001010100001011000011101100000001001100000000000000000000000001000000101001000010000000000101000000001000010001110000100010000100001000000000900000000000000100000110100000100000100…	TCGA-LUSC	1.012e-06	128
TOP2A	TROAP	0.875	co	1	585	010000010800011001000010000110010000000100010010100010001010101101011001011110000100100100010100111010100001000000010000010000001100110010010101011000100000001000100000100001000000001009000000000100001000100000100100000000010101010100010000000011010000110010110110100110100001100101000100901010000101100100000001000000110000100100000100000100001100010110101110100101001101011001000000011000000000011…	GTEx_normal	0.0002592	128
SYT15	S100A14	0.6527	co	1	327	000070100000000001000000000100000000000000000000000010000000100000000000000100000000000000700000000000100000000000010000000000000000000000007000000000000000700000000001000000000000000000000000800000001000000000007000000000000000000000000000000010000000107000000100000000000000000000000100100010000000000100000070000000000100000100000000000000000000000000100000000000070000701700007000000070000000000…	TCGA-NORMAL	0.0003529	128
PPM1G	NME1	0.8738	co	1	69	100000000000000000000000000010000000000000000000000000000000100000000000000000000000000000000000000000000000000000000000000000000000000000011000000000000000000000000000000010000000000009000000000000000000000000000000000000000000000000000000000000000000000000000000000000000000000100000000900000000100000000000000000070000000000000000000000000000000000000000000100000000000000000000000000000000701000…	GTEx_normal	2.228e-06	129
RNASEK	ADRB2	-0.6526	co	1	311	000000000000000000000000000000000000700000000000000010000000000000000000000000000000000000000000000000000000000000010000000000000000000000000000000000000000000000000000000000000000000709000000000000000000000000000000000000000000000000000000700010000000000000000008000000000000000000009100700000000000000007000000000000070000000000000000000000000007000000000000700000000000000000000000000000000007000…	TCGA-NORMAL	0.0003529	129
SHE	GPR116	0.6661	co	2	545	100101001010100100100000010000000000000000101000010100000001000000110000000000110001000010001000000000011100000100001000000010000011000000001000000110001000010010000000010010010000000109001010000000110100000000001011001000010000101011000010101000001111000000000000000000000010000100000011010001800000100000011100100010001000011001111000011000000001001000000000011000100000000110100010000011100000100…	TCGA-LUSC	6.175e-06	129
NDC80	BUB1B	0.8749	co	1	626	010000110000011001000010101110010001000100010010101010001010101101011001111110010100100100010100111010100001100000110080110000011100110010010180011000100100001000100100100001001100001019100100000100001001100110100100010000000101010100010000000011110000110000110110100111100001101101000100101010000101110100000011000000110010101100000100000100011100110110101110000101001111011001010000011000001000811…	GTEx_normal	0.000985	129
RFTN1	SLC16A14	-0.6241	co	1	95	000000000000001070010000000010000000000000000001100000000100001000000710007007000010000001001011110101000101000000000000011000110100000000100100000000010700700700100000000000000007010009001101100000000010000000000000000100000000000000011000000000100010100100000010001000100010100000000010000700001000000110000000000001000000000000100000000101000000000000010010000000000000010000000001010071000000100…	TCGA-LUAD	1.071e-05	129
LMO2	NRN1	0.6245	co	1	546	110011111100811811111101111110110101101101010110100100111111111111111111111001111101101101018100111001111111118010101010101111110100111101011101011111101111011011110110011111111111111109111111111111010010118101110110101011011110011111111111801100111111010101011101111111111111111111111010011101810110111111111110101110110110111100111010101110010000111101111111111001011110111011101001111111110111110…	TCGA-LUAD	0.000229	129
NID2	DLC1	0.6684	co	1	635	101101001011100110011101010001001001100000101001010001110001010000110100010000100001000010701001000810011100101100001071100110070011000001001010100110000100011111010000110010010001000809001010101100110110011110101011001011011000101011100010101001001001001010001001011000101010000110110011010001111010010001011101111011001701010011111001111001010001001000000001111000001000100110111700100000100110100…	TCGA-LUSC	0.0005608	129
ALDH3B1	CD300C	0.6642	co	1	403	000000000000000000000000000000000010100000000001000100000000000000000000000000000001000000100000000000000000000110000010000000090001000000000010000000000000000100000000000010000000000009000000000000110000010000101001000000000000000000000000001000001000001000000000000000001000000000000000700001000000000001000000000010000000000001000000000000000000000000000000100000000000100110000000000000100001000…	TCGA-LUSC	1.436e-09	130
NCAPG	UBE2C	0.8748	co	1	587	000000110000011001000010181110110000000000010018100010001010101101011101011110000100100100010100111010100001100001110000110080001100110010010101011000100100001080100100100001000000001009000100000100001000100000100100810000000101810100010000000011000000110000110110101110100000100101000110901010000101100100000001000000110000000100000100000100001100010100101110100101001001811001010000011000001000011…	GTEx_normal	0.000985	130
AC007461.1	HIST1H2BB	-0.6647	co	1	50	999999990999999999999999999999999999999999991999999999999999999999999999999999999099999999199999900999999999990999999999999999999999999999999999999999999999999999999999900999990999999999999999999999999999999099999999999999999999990999999999099990999999999999999990999999999999999999999999999999999999999999999999999999999999999991999999997999999999999999999999900909999999999099999999999990909999999…	TCGA-LUSC	1.012e-06	130
DAZ3	DAZ4	0.6658	co	1	33	999999999999999999999999999999999999999919919999999999999999999999999999999919999999999999999999999999999999999199999999999999999999999999999999999999999999999999999999999999999999999999999999999199999999999999999999999999999999999999999999999999999999999999999999999999999999999999999999999999999999999999999999999999999999999999999999999999999199999999999999999999999999999999999999999999999999999…	TCGA-LUSC	3.211e-05	130
RILP	AP1S1	0.6522	co	1	354	000000000000010000000100000000000000000000000000000010000000000000000000000000000000000000700000000000000000000000000000000000000000000000000000000000000000000000000000000000000000000009000000000000000000000000000100000000000001700000000000000010000007000000000000000000000000000000000000700007000000000000108000000000000000000100000000000000000000000000000008000000000000000000000000000000000700000…	TCGA-NORMAL	0.0003529	130
ZNF18	TRIM16L	0.6633	co	1	35	000000001000000000008000000000000000000000000000000000000000000000000000000000000000000000000000000000000000000000000000000000000000000000000000000000000000000000000000000000000000000009000000000000000000000000000000000000000000000000000000000000000000000000000000000000000000000000000000700000000000000000000000000000000000000000000000000000000008000000000000000000080000000000000000000000000000000…	TCGA-LUSC	1.66e-13	130
UBE2T	EFS	-0.6235	co	1	380	101111011111111001110010110111000110101000001000000101000100100111101111001100100110111100010010110110111100110111011001110010011101110111111111011011101011011010110101111001110011110019111110010101011100111101111100111111010101111111010011100001110111111001101100101111010011101000110010811101010001100100001110111000110110101010111010101100011001101011110101110011101101100011011100011110001111111…	TCGA-LUAD	1.833e-06	130
ANLN	UBE2C	0.8745	co	1	582	000000110000011001000010181110110001000000010010100010001010101101011111011110010100100100010100111010100001100000010000010080001100110010010101011000100100081080100000100001080000001009000000000100001000100010100100810000000101810100010000000011000000180000810100101110100000100101080100801010000001100100000011000000010000000100000100000100001100110100108110100101000001811001000810011000001000001…	GTEx_normal	0.0002592	131
CDCA5	SPC24	0.8746	co	1	629	010000111100011001000010101011110001001100010110100010001010101101011011111110000100110100010100111111100001010001110000110000011100110010010101811000100100001000100800111001101010001019100101000100001000110010100100010000000101010100010000000011110000110001110110100110100000100101000100701110000101100101100011000000110110001100000100000100001100810110101110100101001101011001010010011100010001011…	GTEx_normal	0.000985	131
ARHGEF16	PIP5K1B	0.6518	co	1	369	000000000000800000000000000000000000008000080000000000000000000000000000000100000000000000000000000000000000000000000000000000080000000000000000000000000000000000000000000000000000000009000008000000000000000000000000000000080010000000000000900000000000000000000000000000000000000000000100000000000000000008000001000000000000000000000000000080000000000000000000000000000000000000000000000000000000000…	TCGA-NORMAL	0.0003529	131
SERPINA10	AADACL2	-0.6666	co	1	93	999999999999999999999999999999999999999999999999999999909999999919999999999099999999999999999999999999999999999999999999999999999999999999999999999999999999990999999999999999999999999999999999999999999999999999999999999999999999999999999999999999999999999999999999999999999999999999999999999999999999999999999999999999999999999999999999999999999999999099999999999999999999999999999999999999099999999…	TCGA-LUSC	0.0005608	131
HDGFRP3	RAI2	0.6227	co	1	391	110010100001111011111111101111010101801110101010011110010111111101011111001101011110111101001111111110010111110011101001111110011101111111118100111000100107001010100110111111001111011009111110111101000011110101000100111111101001010017011101010111110110010111111111111111111011100011118001010110800100111110011001111100101111111110101011000100001100111111111111011101111111110011110011111110001118011…	TCGA-LUAD	2.635e-07	131
C17orf99	HAVCR1	-0.6222	co	1	87	191991708990009100119000099909099901100909997999119900019191999019199190109000010900090000999011900099009910100999009701117010090900999000999999001999019119990909100900070099190001000099011011999909900900090001099909109199000199990999701090090109109919090799099079919071009019990090000990711109900900009910990900009999900910901980110999007999911979098009900009177009990999901901090909999991001999799…	TCGA-LUAD	2.635e-07	132
FGD5	NRN1	0.6237	co	1	578	011111111110101111111101111011111101101101011110100101111111011111101111111111111101101101018100111001111111111010101011101111110110111101011101011111101110011111111110011101111111101109111111111011010010111101110110118011001010011111111111111100111111010101010101011111111111111111111011011111110110101111111110101110110110111100111010101110010000111101111111111100011110111011101181111111111111111…	TCGA-LUAD	0.0008554	132
DLC1	DACT1	0.6649	co	1	621	101101001011100110110001010001001001100000101001010000110001010000110100010000100001000010101001000010011100101701001070100110070011000001001010700110000100011111010000110011010001010009001010101100110100011010101011001001010000101011100010101001001001001010001001011000101010700110110011011001111010010001011100110011001001011011111001111001007101001000000001101000101000100110111100100000100100100…	TCGA-LUSC	0.0001439	132
APOL3	PIP5K1B	-0.651	co	1	340	000000000000000000000000000000000000000000010000000010001000000000000000000100000000000000000000000000000000000000010000000000080000000000000000000000000000000000000000000000000010000009000008000000001000000000000000000000000100000000000000900000000000100000000000000000000000000000000100000000000000000000000000000000000000000000000000100000000100000000000000000000000000000000000000000000000000000…	TCGA-NORMAL	0.0003529	132
BIRC5	ANLN	0.8738	co	1	594	000000110000011001000010108010010001000100010010100010001010101101011011011110000100100100010100111010100001000000010000010000011100110010010101011000100100081000100000100001080000001000100100000100001000100010100100010000000101010100010000000011110000100010110110100110100000100101080100801010000001100100000011000000110110110100000100000100001100110110101110100101000001011001010810011000011000001…	GTEx_normal	0.0002592	132
GTSE1	CDCA3	0.8745	co	1	621	010010010100011001000010101010010000000100010010100010101010101101011001111110000100110100010100111010100001110000110001010000011100111110010101011000100100001000100011000001101100001009100100000100001001100110100100100010000101010100010000000011100000110000110110100111100001101101100101801010000101110101000011010000110010100100000100000100001100010110101110100101001101011001000000011100001001011…	GTEx_normal	0.000985	132
TM4SF5	RP11-307N16.6	-0.6236	co	1	60	999999990999009999999999999999999919999999971909099999999999999990999991919919999099999999999999999999991099999191999999999999191099999999199909999999999999999999999099911999999999999999999199999999991999099999999999999999999799999919991999999999999999999999999999999919999999999999991999991919199999999999999999099999919999999999919099991999999199909199999991909999999990191999990919999999999999199…	TCGA-LUAD	0.0008554	133
PDZD2	RNF128	0.6497	co	1	303	000000000000000000000000000000000000000000000000000010000010000000000000000100000000000000000000100000000000000000000000000000000000010000000001000000000000000000001000000000000000000009000000000000000001000000000000000000000001000000000000000010000000110000000000000000000000100000000000700000000000000000000000000000000100000000000000000010000000000000001000000000000000001000000000000000000000000…	TCGA-NORMAL	0.0003529	133
KIF4A	CDC45	0.8738	co	1	638	010000110100011001010110101111010000000100010010100010001010101101011111111110010100100100010100111011100001000008110000110000011100111010010101011000100100101000100100101001100000001019100101000100001000100110100100010010800101010100010000000011100100110000110110100111110001100101000110901010000101100100100011000000110010001100000100000100101100110110101110100101001101011001010010011000001001011…	GTEx_normal	0.000985	133
KANK2	GHR	0.6229	co	1	635	111111111111110110111111010111111111101111111110101101111101111111101111111101111011111111011111110111111111111111101111111111111111111111111111111111111111111111110111111101111111111109111111111111111110111111111110111111111111811111111111111111111111111111111111111111111111111111101011011111111111111110111110111111111111111110111111111101111111101101111011111111111111111011111111111111111101111…	TCGA-LUAD	5.334e-05	133
LDB2	GPR116	0.6644	co	1	571	100101001010100110111000000000000001000000101000010100000001000000100010000000110001000011001000000000081100001100001010001010000011000001101010100110001100010110010000010010010001000109001010100000110100000000001011001000010000101011000000101000001118000100001000001000100010000018000011810001000000110000000100100011001000010001111000011001000001001000000000011000100000000110110001000011100000100…	TCGA-LUSC	6.175e-06	133
PLLP	DAB2	-0.6496	co	1	356	000000000100000000000000000000000000000000080000000010000000000000000000000100000000000000000000000000000000100000010000000000070000000000010000000000000000000000000000001000000010000009000000000100000000000000000000000000000100000000000000000010000000008000000000000000000000000000000100001010000000000000000001000000000000000000000000000000000000000000000000000000000000000000000010001000000000000…	TCGA-NORMAL	0.0003529	134
GPR128	RTP1	-0.6637	co	1	55	999999991999999999999999999999999099999999999999999999999999999999999999999999999999999999999999999999999999999999999999999999999999999999999999999099999999909999999999999991999199999999999999999199999999919999999999999999999999999999199999999999999999999999999999999999999999999999199999999999999999999999999999999999999999999999999999999999999999999999999999999999999999999999999999999999999919999…	TCGA-LUSC	1.012e-06	134
CEP55	MYBL2	0.8737	co	1	628	010000110100011001000010101010010000001100010010100010001010101101011111111110010100110100010100111011100001100000010000110000011100111010010101011000100100001000100000101001100000001009100100000100001001100110100100110000000101010100010000000011010000110000110110100111100000110101000100901810000101110101000011000000110100111100000100000100001100110110101110100101801101011001000010011100001000011…	GTEx_normal	0.000985	134
DLGAP5	HMMR	0.8736	co	1	574	000000110000011001000110008110010000000100010010100010001010101101011001011110000100100100818100111000100001000000110081100000001100110010010100811000100100001000100000100001000000001009100001000100001000100100100100010000000101010100010000000011010000110010110100100110100000100101000100901010000801100100000011000000110010000100000100000100001100010110101110000101001081011001010010011000011000011…	GTEx_normal	0.0002592	134
ADAMTS8	NAP1L2	0.6227	co	1	562	111111101101011110111111100111111111110111111111111001111111111101111111111101101011111000019011101111110111110011101011111110101111010111011111011111111101110111111111111101111111111109111111111111000110111111110101111111011100111119011111011111111001110111111001017111111110010001111111111110911111111011111100111171111111010110111011100111110101101111111110010001101111011111111111111111011101111…	TCGA-LUAD	5.334e-05	134
HLA-DOA	TESC	0.6647	co	1	643	010110000000000800000000010000000111110111000100000000000001000000100000000100101001011000018000000000000000001000001110000100000010000110000010100100100010010000000011000011010000100009000000000001810101001000110010000001101010101090000000111000000000011000000001008000010101001000007000700000000000011000011101000100001001100001001000110010000008000001000100000010100010000110110100000000100100000…	TCGA-LUSC	0.0005608	135
MAGEC3	C15orf54	-0.6217	co	1	90	990999909191919990991991911090090909999999999999999991919919999999091999999099999990190999199990999900999099909900997099799099999991099990199991991990990911997990999919999999990999999909199990999911919919110008099999909901099991999999799919090910999199911909109791919099919099909119177999999999911000909901909999199990979999901999907191901999979999999909799199199099991999090999999999999991999117999…	TCGA-LUAD	1.833e-06	135
KDM5B	CTNNA1	0.6493	co	1	307	000000000000000000000000000000000000000000000000000100000000100000000000000000000000000000000000000000000000000000010000000000000000000000000000000001000000000000000000000000000000000007000000700000000000000000000000700000000000000000000000070000000000000000000000000000000000000000000100000000000008000000001000001000000000000000000000000000000000000000001000000100000000000000000000000000000007000…	TCGA-NORMAL	0.0003529	135
DRAM1	SLC16A4	0.6633	co	1	487	000100000000000010000000010000001110110001100001080100000000000008100100000000000000000000101000000000000800100100000011008000001000000000100010000000000000000100800000000010010000100000010000000010110000101000001018000000110000100001000001101000001001011000000000800000001000000001008011000000101000000000000100000010001000000101000000010801000000000000000001000000000000100100000100000000100010000…	TCGA-LUSC	1.393e-07	135
TPX2	BUB1B	0.8735	co	1	586	000010110100011001000010101010010000000000010010100010001010101101011001011110000100100100010100111010100001000000110080010000011100010010010101011000100100001000100000100001000000001009000100000100001000100010100100010000000101010100010000000011110000110000110100100110100000100101000100101010000101100100000011000000110010100100000100000100001100010110101110100101001001011001010010011000001000011…	GTEx_normal	0.0002592	135
HS6ST3	UNC80	0.6633	co	1	31	999999999999999999999999999999999999999999999999999999999999999999999999999919999999999999999999999999990999999999999999999999999990999999999979999999999999999999999999999999999999999999999999999999099990990999997999999999999999999999999999999999990999999999999999999999999999999990999998999990799999999990999999999990999999999990999999999999999999999999999999999999999999790999999999999999909999999…	TCGA-LUSC	1.393e-07	135
LST1	TESC	0.6646	co	1	650	000110000000000800000000110000000101110111000100000000000001000000000000000100101001011000810000000000000000011000001110000100000010000110000010100100100010010000000111000011010000100009000000000001010101001000110010000001001010101098000000101000000000011000000001000000010101001000010000800000000000011001011101001100001001100101001000110010000000000001000000000010100010000110110100000000100100000…	TCGA-LUSC	0.0005608	136
FOXM1	UBE2C	0.8733	co	1	579	000000110100011001000010181810110001000000010010100010001010101101011101011110000100100100010100111010100001800000010000000080001100111010010101011000100100001080100000100001100000001009000000000100001000100000100100110000000101810100010000000011000000110000110100100111100000100101000100801010000101100101000011000000110000100100000100000100001100010100101110100101001001811001000010011100001000011…	GTEx_normal	0.0002592	136
S1PR4	PRKCH	-0.6489	co	1	332	000000000000000000000000000000000000008000000000000010000000000000000000000000000000000000700000000000100800000800010000000000000000000000000000000000000000000000000000100000000000000009000000000000800000000010000000008000000080000000000000008000000000000000000000000000000000000000000100000000000000000007000000000000000000000000000000000080000000000000000000000000000000000000000000000000000000000…	TCGA-NORMAL	0.0003529	136
SERPINA4	ASB11	-0.622	co	1	105	999999109999999999199909901900999991191999991099919191999979999019199991099019919990999199999999009999999999199991919999719999099909901999999990919099979019997990999910999999999019199199999919991999990999199119119999119991999199999199797909999909199909999199909917901911999999099917719799919997099919999199999999999999999199191919999999919099999979999999907990999999991999999919999919999197999199999…	TCGA-LUAD	5.334e-05	136
DUOX1	UCK2	-0.6206	co	1	419	110111001101110001001111111011101101101101001111011000110011110100100100100000100101111110107101110111100011110111101170111111010017101111111010011110000001011111110110100171110101100109101010101011110100111111111111111111101010111101100101011001011111011011101110110100011111011111111001110001711101011001101711111010110011111110101101010001111011011001000101101000011111100111111100701011010111110…	TCGA-LUAD	1.071e-05	137
LMO3	GPR116	0.6616	co	1	555	100001801000100110111000000000000000100000101000010100000001000000110000000000110001000080101000000800011100001108001010001010000011000000101010100000001000010110000000010010010000000009001010000000110100000000001811001000010000101011000010101000001011008000000000000000000000000000000011110001100000000000000100000011001800010000111000010001000001001000000000011000100000800100110011800011800000100…	TCGA-LUSC	1.012e-06	137
DLC1	LRRC32	0.6645	co	2	690	101101011011110110111101010001001001000000101001010100010011010110100110000000110011000010001001000000011100101111001000100111001011000001000010100110000101011111010100110011110001010009001010001100810100011110101011001001011000101011100010101101001011001110001011011010101010000111100011711011111010110010011101111111001001010011111001111001000001001000000001111000101000100110111111100000110110110…	TCGA-LUSC	0.0005608	137
RP11-332O19.5	GIP	-0.6196	co	1	39	990999999999990999999919999999999999999999999999999999999991999999199999999999919999999999999999999999991999999199999919999999999999999999999999999709919999999999909999990909999999199999099999999999999909919999999999999999199999999919999999999999999911999199999999909999999919999199999999999999999999999999099991999999999999119999909999991999990999099999999999099999999999999999999999999999919999199…	TCGA-LUAD	1.833e-06	137
ASPM	TROAP	0.8733	co	1	624	010000110100011001000010101110010000000100010010100010101010101101011001011110000100110100010100111010100001100001110000110000011100110010010101011000108100001000100001101001101101001009100000000100001001100010100100010010000101010100010000000011010000110010110110100111100001100101000100101010000101100100000011000000110010101100000100000100001100010110101110800101001801011001010000011100001000011…	GTEx_normal	0.000985	137
SYT15	LRRK2	0.6484	co	1	315	000000000000000000000000000000000000000000000000000010000000101000001000000100000000000000000000000000000000000000010000000000000000000000000000000000000000000000001001001000000000000009000000800000001011000000000000000000000000000000000000000010000000100000000100000000000000000000000100800010000000000000000000000000000000000000000000000000000000000000000000000010000000000000000000000000001000000…	TCGA-NORMAL	0.0003529	137
DLGAP5	CENPF	0.8732	co	1	600	800000110000011001000010001110010000000100010010101010001010101101011001011110000100100100810100111010100001000000110081110000011100110010010101011000100100001000100000100001000000001019000000000100001000100010100100010000100101010100010000000011010000110010110110100111100000100101000100901010000101100100000011000000110010100100000100000100001100010110101110000101001001011801010010011000001000011…	GTEx_normal	0.0002592	137
ROBO4	GPR116	0.6604	co	1	595	100101001010100110111000010001000001008000101000010100000001000000110010000000110001000011008000000100011100001100001010000010000011000001100010100110001000010110010000010010010001010109001010100000110100000000001011001000010000101011000010101000001011000000000000001000100010000101000010110001000000100000000100000011001000010001111000011001000001001000000000011000100000000110110011000011100000100…	TCGA-LUSC	6.175e-06	138
EFS	SLIT2	0.6186	co	1	336	100111001011111000110010010001010110101000011000000101001100101100101101001000100010111000010010111100181801110100011001110000000001110101811181001011101010011010110001011000010011111019011110010101011100011001011100111110010101111011010011100010110011101001101100101111010011000001017010011111000000100000001110011100010110111000110100801100010108101011010110110001101101110010001110010110001111000…	TCGA-LUAD	1.071e-05	138
KIF23	GSG2	0.6635	co	2	728	001101001011100110111801010000001110111011101101011101010101010010100000000001101011000081108010000100011110011101001110001111100011000101101010100111011011110111011001010110010001100119011010110011110110011001011011001111001010101011101111101100001111001100000001011000011110011010111011010101111010001011111100111111001001010011111010111011000011101001010001011010110010100110101101100011110011100…	TCGA-LUSC	0.0005608	138
CLDN18	SFTA3	0.6582	co	1	262	000000001000000100000000000000000000000000000000000000000000000000000000000000000000000090900000000000009100000100009090000000000000000000000000100000000000010090000000080090000000000009001000900000100100000000000090008000000000000011000090701009000009001000000000000000009000000000009000000009000000000000000900000000000000010001110000000009000000001000000000001000000000000109100900990090100000100…	TCGA-LUSC	1.436e-09	138
ATP4A	FOXD4L4	-0.6603	co	1	91	999999999999999991999999999999999999999990999999999999999999999999999909999990909999999999999999999999999999909999999999909999999999999999999999999999909999999999999999999999999999999999999999099999999999999999991999999999999999999999999999991999999999999999999999999999999999990999999999999999199999999999999999999999991999999999999919919999999999999999999999099999999999999999999999999991999999999…	TCGA-LUSC	1.012e-06	138
CD2AP	GNAQ	0.6483	co	1	366	000000000000000000000000100000000000000007080700000010008000000000000000000000000000000000070000000000000000000000010000000000000000000000000007000000000000000000000000000000000000700007070000000000000000000000000000000000000000000000000000000010000000000000000000000000000000000000070100700000000000000000000000000070000000000000000000100000000000000000000000000000000000000000000000000000000000700…	TCGA-NORMAL	0.0003529	138
BIRC5	MELK	0.873	co	1	559	000000010000011001000010108010010000000000010010100010001010101101011001011110000100100100010100111010000001000000010000110000011100110010010100011000100000001000100000100001000000001000000100000100001000100000000100010000000101810100010000000011110000110000110110100110100000100101000100801010000001100100000011000000110010000000000100000100001100010110101110100100000001011001010010011000000000011…	GTEx_normal	0.0002592	138
MYCT1	GHR	0.6185	co	1	629	111111111111111110111111110111111111101101111110111100111101111111111111111001111011111181011111111111181111111111101111111111110111110111111111011111111111111111110111111101111111111109111111111111111100111111010110111111111111811111111111110101111111010111011111111110111111110111101011011111111111111111111110111111111111110111111111111101111111111101111011011011111111111111111011011011110111111…	TCGA-LUAD	5.334e-05	139
RAMP2	NRN1	0.6195	co	2	563	011111111110100111111101111011110101801100010110100101111111111111011111111011111100101181011100111011181111111010101011101101111100111101018111101111101111010111110110011100111111111109111111111111010010111101010110111011011110011111111111101100111111010111011801111111181111111111111011701111110110111111111110101110100110111100111010101100010000111101111111811011011110111011101111111111810118111…	TCGA-LUAD	0.0008554	139
CD4	ALDH3B1	0.6575	co	1	404	100000000000000800000000000000000000101001000001000100000000000000000080000000000001000000708000000000000000000110000010000000080001000000000010000000000000010000000000000010000000000109000000000000110000010000101001000000000000000008000000001000001000001000000000000000001000000000008000000001100000000001000000000010000000000001000000000000000008000000000000100000000000000100000000000000100001000…	TCGA-LUSC	1.436e-09	139
PIP5K1B	CSRP1	-0.6478	co	1	326	000000000000000000000000000000000000000000010000000810001000001000000000000100000000000000000000000000000000000000010000000000000000000000000000000000000000000000100000000000000000000009000008000000000000000000000000000000000000000008000000900000000000100000000000000000000000000000000000000000000000000000000000000000000000000000000000000100000000000000000000000100000000000000000000000000000000000…	TCGA-NORMAL	0.0003529	139
CDC45	RBPMS2	0.6183	co	1	490	011111101111110800111111111101101101801111111111001101110110111111010111100101010118111111101101110111101101110011111181101011010001111111118000110111111111101111000111111100101111110119111011711111001111111111110101110111111110101011011111110101111110111111110111011101110111111100101011010101011111111110110010101101171101101110110011111011100011100011111101711011011101000001110010111111011111111…	TCGA-LUAD	1.071e-05	139
FGFRL1	SLC16A14	-0.6147	co	1	108	000001100010701170111000000010010000000000000001100000000100001078000710007007000010000001001010110001001101000700000000001000810100010000100000000000011700700710100000000070000007000009001118100000000000001000000001000100000000000010011011007000108011100100000010001000101010000000000010100700701000100110000000000000000000010000100000000101000000000001010010010000000000010000100001000071000000100…	TCGA-LUAD	2.965e-09	139
NUSAP1	BUB1B	0.8727	co	1	564	000000110000011001000010001010010000000000000010100010001010101101011001011010000100100100010100111000100001000000110000010000011000000010010100011000000100001000100000100001000000001009000000000000001001100100000100010000000101010100010000000011100000110000110100100110100000100001000100801010000101100100000011000000110010001100000100000100001100010110100110000101001001011001010000011000000100011…	GTEx_normal	6.028e-05	139
PIP5K1B	AHCYL2	0.6458	co	1	276	000000000000000000000000000000000000000000010000000010001000001000000001000100000000000000000000000000000000000000000000000000010000000000000000000000000000000000100001000000000000000009000008000000001000000000000000000000010100000000000000900000000000100000000080000010000000000000000000801010000000000000000000000000000000000000000000000100000100000000000000000000000000000000000000000000000000000…	TCGA-NORMAL	5.941e-05	140
TSPYL5	LRRK2	0.6463	co	1	358	000000000000001001000000000100010001000000000000000010000100001000000000000100000000000100010100000010070700000000010000000000000100000000000000000000000000000000000001001000000010000009000000000000001010000001000100000000000110000100010100000110000000100100010000100000000000100000000100000010000000000001000000000000000000000000000000000000000000000110001010000100000000000000000000001000001000000…	TCGA-NORMAL	0.0003529	140
CEP55	ASF1B	0.8728	co	1	590	000000110000011001000010001010010000000000010010100010001010101101011111011110000100100100010100111001100001010000010000010000011100010010010101811000100100001000100000100001001000001009000100000100001001100010800100010000000101010100010001000011010000110000110100100110100000100101000100901010000101000100000011000000111110001100000100000100001100110110101110100101001001011001000010011000001000011…	GTEx_normal	0.000985	140
RUVBL1	KIAA1524	0.6615	co	1	710	101101001010100110101000010100001111110001101101010101010001000000100000000001101001000011101010000000011110011100001110000110100011000000101010100111011010010101010110010110010000110119011010110011110110011000011011001101101000101011100011101100001111001100001001010000001110000010010011710001101010011001111000010111001001010011111001101011000011001001010000011010110010100110100100100001110111100…	TCGA-LUSC	0.0005608	140
ORC6	EFS	-0.6168	co	1	392	111111011111110001110010111001001110101100001000100101100100110110110110001100110110111100010010100101011100110101111001101010010101110111111011011011101111011010010101111001110011110019111110010001010100110111111100111111010111111011010011100111110111111001111110011001110011101000010010011101010101100101101110111100110110111010110010101010111011101111110110111011101110111011011110011110001111111…	TCGA-LUAD	2.635e-07	140
NRN1	CDH5	0.6174	co	1	555	011111111110110111111101011011110101101100011110100101011111111111111111111011111101101101010100111011111111011010101011101101111100111101001101001111101110011111110110011101111011111109011111111111010000111111110110111011011111011111111111111100111111010101010111111111111111111111111011011111110010101111111110101110110110111100111010101110010000111101111111111001011110111011101011011111110111111…	TCGA-LUAD	0.000229	141
TESC	RAB37	0.661	co	1	647	000010000000000000000000110000000101110101000100000000000001000001100000000100100001001000810000000000010000001000001110000100000010000110000010100100100000010000000111000010010000100009000000000001010101001000010010000001001010100090000000111000000000011000000001000000010101001100010000000000000000011001011101001000001001000101000000110010000000000001000100100010100010000010110100000000100100000…	TCGA-LUSC	0.0005608	141
TEK	SLC16A4	0.6585	co	1	503	000100100100000011000100000000001110111011000001010101001000100001100100100000000000000000801000100000080000100000000011000000001000000000100011000000110000000101800010000000010000110009010000000011000100001001011011000000110000101001000000001000000001018000001000800000001001001001011011010000001001000000101100001110011000000101000010110801000000100001000001001000100000100100101100001001101010000…	TCGA-LUSC	6.175e-06	141
ASAH1	GYPC	-0.6451	co	1	316	000000000000000001000000000100000000000000000000000010000000000000000000000000000000000000000000000000000000000000010000000000000000000000000000100000000000000000000001000000000000000009000000000000800000000000000000000000000000000000000000000010000000000000000000000000000000000000008100700000000000000000000001000000000000000000000000000000000000000000000000000000000000000000000000000000000000000…	TCGA-NORMAL	5.941e-05	141
LRRK2	BEX2	0.6456	co	1	335	000070000000000000000000000000000001000000000000000010000000001001000000000100000000000100010000001010000000000070007000000700000000000000007001010000000010000000000000001000000000100009000000000000001000000000000000000700000110000000000007010010000007100000010000007000000007100000070000000000000000000001700700000000000000000000000000000010000010000010000000000010000071700000007000001000000001000…	TCGA-NORMAL	0.0003529	141
CEP55	ZWINT	0.8724	co	1	608	000000110000111001000110001010010001000000010018100010001010101101011001011110010100110100010100111011100001110000010000110000001100100010010101011000100100001000100100100001101000001009100000000108001001100110100100010000000101010100010000000011110000110000110100100110100000100101000100901010000101010101000011000000010110001100000100000100001100110110108110100101001001011001000010011000001000011…	GTEx_normal	0.000985	141
DLGAP5	CDCA2	0.8724	co	1	623	010000110000011001000110101110110000000100010010101010101010101101011101011110010100100100810100111010100001000000110181110001011100110010010100011000100100001000100100101001101000001019100101100100001000100110100100010000100101010100010000010011010000110011110110100111100000100101000100901010000101100100000011000001110010000100000100000100801100110110101110000101001001011801010010011100011000011…	GTEx_normal	0.000985	141
RASSF2	TESC	0.6593	co	1	600	000010000000000000000000110000000111110111000100000000000001000000100000000000101001010000018000000000010000001000001110000100000010000110000010100100100010000000000111000011010000100009000000000001010101001000110010000001101010101090000000101000000000011000000001000000010101001000010000000000000000011000011101001100001001100100001000110010000000000001000000000010100010000110110100000000000100000…	TCGA-LUSC	0.0001439	142
PTGER2	CD93	0.6147	co	1	61	000000000000000000000100000000000000000000100000100000000000100007000100000010000000000100001000000000000000000001100000001010100000001100000000000000000100000000010100000000000000000009000100000000000100000100000100001000070000100100100000800000000000010000000000000000000000000001007000000000000000000000000000100000000000000000000000000001001010000001000001000000000000010000000000000100000100000…	TCGA-LUAD	1.833e-06	142
CCNB2	HMMR	0.8721	co	1	564	000010110000011001000100100010010000000000010010100010101010101101011001011110000100100100018100111010100001000000110000000000001100110010010100811000100100001000100000100001000000001009000000000000001000100100100100010000000101010100010000000011100000110010110100100110100000100001000100900010000001100100000011000000110010000100000100000100001100010110101110000101001081011001010010011100001000011…	GTEx_normal	0.0002592	142
WWC2	FAM167A	0.6446	co	1	355	000000000000000000000000000000000080000000000000000010000000000000000000000000000000000000000000000000000000000000000000000000000000000000000000000000000000000000000000000000000000000009000100000000000001000000000000000000000000000000000000000000000000000000000000000000000000000000000100100000000000000000000001000080000000000000000000000000000000000000000000000000000000000000000000000000000000000…	TCGA-NORMAL	0.0003529	142
SERTAD2	STX11	-0.6146	co	1	63	000000000000000000010000000000000000001000070000010000000000000000000010000000010000000000101000000000000000000000000011100000010000011000107001000700000000100000100000000000000000000009000001100000100000000100000100001000010000000001000000000000000000000000001000001000000000000000001000000000100000000000000000000010000100000101700000000001000001000000000000100000000000000000000001000100000001001…	TCGA-LUAD	2.635e-07	142
AURKB	KIF2C	0.8722	co	1	606	000000110100011001000000101010110000000100010010100010001010101101011001111110010100100100010100111010100001000000010080110000011100110010010101011000100100001000100000100001100010001009000100000100001000100100100100110010000101010100010000000011000000110000110110100110100001100101000100801110000101100101000011000000010000100100000100000100001100010110101110100101001101011001000010011100001000011…	GTEx_normal	0.000985	142
GIMAP1	ALDH3B1	0.6548	co	1	396	000000000000000000000000000000000010101001000001010000000000000000000000000000000001000000100000000000000000000110000010000000000000000000000010000000000000000000000000000010000000000009000000000000110000010000101001000000000000000000000000001000001000001000000000000000001000000000000000000000100000000001000000000010000000000001000000000000000000000000000000100000000000100100000000000000100001000…	TCGA-LUSC	1.006e-10	142
SEMA3G	ZMYND12	0.6156	co	1	76	100000000001100100000000001000000000000000100000001000000000100000000000000000000000000011008000000000000000000000000100000000010000000000011000011001000001000000010000000070000000000009000000000000000000000001000000001001000000100000100000000100000100000000001101000000010000100000000000900001000100010001100000000000000000000000000000000000000000000000000000100000010000000000000000000000000001000…	TCGA-LUAD	5.334e-05	143
S100A16	CLEC3B	0.6169	co	1	279	111000100000908011000000101111000110008111000008111700000000101001001011101110001010101100807111111011100700000000000011011000011101000000017111100000010010101100000010101010090000011019000000100000001001101010001001010100100110000090100001001000011010110001010100100010011000101001000001900011101100100101000011100180011010000001000100010000011180100100101101001001110000111100001000001171000101000…	TCGA-LUAD	0.0008554	143
CAT	C1orf116	0.6441	co	1	317	000000000000000000000000000000000000000000000000000010000000100000000000000110001000000000000000000000000000000000000000000000000000010000010100000000000000000000000001000000000000000809000000000000000001000000000000001000000000000000000000000010000000000000000000000001000000000000000100700007000000000000000000000000000000000000000000000000000000000000000000000000000000000000800000000000000000000…	TCGA-NORMAL	0.0003529	143
PIP5K1B	PRSS8	0.6441	co	1	276	000000000000000000000000000000000000000000010000000010001000001000000000000100000000000000000000000000000000000000000000000000010000000000000000000000000000000000000001000000000000000009000008000000001000000000007000001000000000000000000000900000000000107000000000000000000000000000000000700000000000000000000000000000000000000000000000100100000100000000000000000000000000000000000000000000000000000…	TCGA-NORMAL	0.0003529	143
CENPF	KIF11	0.8712	co	1	576	100000110000011001000010001011010000000000010010101010001010101101011001011110000100100100010100111000100001100000010000110000001100100010010100011000100100001000100100100001000000001009000000000100001000100010100100010000000101010100010000000011010000110010110100100110100000100101000100901010000101110100000011000000110010000100000100000100001100010110100110000101001001011001000010001000001000011…	GTEx_normal	0.0002592	143
CEP152	PRC1	0.6587	co	1	727	100101001011100110111001000100001110111001101101010101000100010010100000000001101011001011101010000000011110001100001110001111100011001001101018100111011001110111001001011100010011100119011010111111110110011001011011101101011010101011101110111100001111001100000011001001011110011010111001701101111010001018011100001111001001110011111011111011100011001000011001011010110010100110101101100011110011100…	TCGA-LUSC	0.0005608	143
TPX2	SDR42E1	-0.6147	co	1	357	011777100111111011710710101101101101000110110100100100110110010100010171001101110110111101100810100111177008010100101081111011011101101111001011000000107110017071001111101170101001110119111101101100001011170117100010110011111110701007000000000701110117117011111171111001110101111110170010801001010111711001111711111001111111111110101010000100111117100010101000117000777111000001710011710100001111710…	TCGA-LUAD	1.071e-05	143
OIP5	BICD2	-0.6169	co	1	626	811111111111101101111111111101111111011111111110101110111101111111111111110101111101011101018111110111111110110111110101111111111111111111011101111001110111001101111111111011101111111119100101111110111011010111110111117111111110111111111101111111110111110111101111111111101111111110111111010101111101110111111111111101011110111110101111011101110011110011111111118111111111111111011011110100111101811…	TCGA-LUAD	0.0008554	143
BIRC5	NDC80	0.8721	co	1	577	010000110100011001000010100010010001000100010010100010001010101101011001011110000100100100010100111010100001800000110080010000011100110010010181011000100100001000100000100001001000001019100100000100001000100100100100110000100101010100010000000011110000110000110110100110100001100101000100001010000001100100000011000000110010100100000100000100001100010110101110100101001101011001010010011000000000811…	GTEx_normal	0.000985	143
LDB2	C15orf59	0.6168	co	1	528	111101101110110880111010011011111111118111001111111100111111010110100101111001111011011001011011110101081111111111001111111111111011100101101100101811111100111111110110111110111111110109111111810111010100111101010011001111111170811111111111111101111010001111101101101111111011011110181081011111111001011018101801111111111011111011111111111081110101108101110111111001101110111110111101110111110110110…	TCGA-LUAD	0.000229	143
MCC	JAM2	0.6137	co	1	472	111101101101010111111111011110111111101111110101111101111111111111100111111101111110011011007111110111011111100011101111111011181111011101111010111111010110101111111110011111101111111109111011111111000010111101011111111111111011111111111101111001111110000111001011111110111110101011101011710111811111111111110110111111101111011110111011111101111188101101111001011000111111100111111111111111110110111…	TCGA-LUAD	2.635e-07	144
ACSL5	CYSLTR1	0.6532	co	1	345	000000000000000000000000000000000000000000100001000100000000000000000000000000000000000010000000000000008100000000000010000000000000000000000010000000000000000000000000000000000000000009001000000000100000000000000000000000000000000001000010101000000000001000000000000000000000000000000000900000000000101000010000000010000001000001000000000000000000000000000000000000100000000100100000100000100000000…	TCGA-LUSC	1.436e-09	144
TOR4A	ACVRL1	0.656	co	1	380	100000000001000010000000000000000010011010000001010100000001000000000000000001000010000010008100000000010000010000101100001010001000000000001000000000010000000000000100000010000080000009000000000000000000000000000000000100180010000101000001800000000000000000101000001000010000000000000000000000001000000001010001000111010000000001000000010011000001000000000000101000100000100100100001000001000000000…	TCGA-LUSC	1.012e-06	144
TMEM214	TAL1	-0.658	co	1	188	100000000000000000000000001000000000101000000000001000007000000000000000000000000001000010001000000000010700000000000110000000010000000000017011100000000000000000010100010010000000000009000000008001100100000000001000001000000000100000100000000000000100000000001000000001011000000000000001700001000100000001000000000000010000000000000000001000000010000000000000700000000000000100000000000000000007000…	TCGA-LUSC	0.0001439	144
HSD17B4	LAMP3	0.6439	co	1	324	000000100000000000000000000000000000800000000000000010000000000000000000000100000000010100000000000000000000000000010000000000000000000000000800000000000000000000000001001000000010001009000000700000801001000000000000100000000000000000000000000010100000100000010100000000000000000000000100900010000000000000000000000000000801000000000000000010000100000110000000000010000000000000070000000000000000000…	TCGA-NORMAL	0.0003529	144
CEP55	KIAA0101	0.871	co	1	598	000000110000011001000010001010010001000000010010100010001010101101011101011110000100100100010100111001100001110000010000108000011100110010010101011000100100001000100000100001001100001009000100000100001001100110100100010000000101010100010001000011010000110000110100100110100000100101080100981010000101010100000011000000111010100100000100000100001100110110101110108101001001011001000010011000001000011…	GTEx_normal	0.000985	144
TESC	CD37	0.6564	co	1	651	000010000000000800000000110000000111110111000100000000000001000000100000000100101001011000818000000000000000001000001110000100080010000110000010100100100010010000000111000011010000100009000000000001810101001000110010000001101010101090000000111000000000011000000001000000010101001100018000000000800000011001011101001100001001100101001000110010000000000001000100100010100010000110110100000000100100000…	TCGA-LUSC	0.0005608	145
FGD5	FAM198B	0.6122	co	1	46	000000100000000010001000000000001000017000000001011000000010000070000000000000000000000000008000000001000000100010000100000000000000000000101000000000000700107000000000000000000000000009000000001000000000007000000007000000000000000000000000000000001000000000100000010000001000000000001000000001000000000000000000000000000000000000010001000000000000000000000000001000000000000000001000000001000000000…	TCGA-LUAD	2.635e-07	145
CDC20	ASF1B	0.8709	co	1	604	000000111010011001000100101010010000001100010010100010001010101101011101111110000100100100010100111010100001000000010000010000011100111010010101811000100000001000100000010001000000001010000100000100001001100000000100010010000101010100010000000011100000110011110110100110100000100101000100801110000101100100000011000000110000811100000101000100001100110110101110100101001101011001000000011100001000001…	GTEx_normal	0.000985	145
THBD	TIE1	0.6147	co	1	605	111111110111010811111111011001101111001011111101111100011111111011011110110011111111111110100011110111001110110111101111111111111011111111111111111010010111101111111110010101111111111109111111101111110100111111101111111111111110100011111101011101011010010111011011011111111111101111011011111011100011111011111111111111111111111111011111111001111111111101110101111001111111001111111011000111100111111…	TCGA-LUAD	0.0008554	145
CCT3	UCK2	0.6538	co	1	560	101101001010000100110000000000001010110000001000000100001100000010000000001001101001000011000010000000011100100800000000000000100011000000109010100810101100110010000000010010000011010019001010000000100110000000001010001000010000100011101010100100000001001100000010001000101010000000000011700101100010000010000000010000001000000001110000111011000000001001000000011010100000000100100100100110100000100…	TCGA-LUSC	6.175e-06	145
LMO2	ESAM	0.6544	co	3	105	000180000008000000000000000000000000110000000000000000001000000000000000000010000000000000108000000000010000001000800010000000000000000000000000000000000000000000008000000000000000000009000000000000000000001000000000000000000000000000000000081000000000000000000800000000080000000000100001000001000000000000000001000000000800000000000000000000000000000000000000100000000080000000000010000800000000000…	TCGA-LUSC	3.211e-05	145
DUOXA1	UCK2	-0.6139	co	2	446	110111001101111101001111111011107101101111101111011100110011110100110100100001100111111110117101111111100111010111101191111111011017101111117010011111001011001111010111100171110101100119111110101011710100111111111111111111101010111101000101011001001117011001101101010100071101001111111000011000711101011001101711111011111011111110111101010007111111111001000101107000011171700171711101100071010111110…	TCGA-LUAD	5.334e-05	145
KIF4A	ZNF750	-0.6137	co	1	452	111101111110110000110111100101100011111111110010111101110111010100110111100101111111111111101101100111101000000111101011111111011011101001001011110111101110111190010111111010101011010119100111011100011111110110111010111111111100011000100111110001111111011111111110001101110011001100110011910107111111110001111910111111111111111100110011011000101011101010111001100010101111900101110110010000101111110…	TCGA-LUAD	1.071e-05	145
GPD1L	PDZD2	0.6438	co	1	325	000000000000001000000000100000010000000000000000000010000000000000000000000100000000000000010000101000000000000000010000000000000000010010000001000000000000000000001000000000000000001009000000000000000001000000000000000000000001000001000000000000000000110000000000000000010000100000000100000000000000000100000000000000010100000000000000000110000000000000001000000000000000001000000000000000000000000…	TCGA-NORMAL	0.0003529	145
CACNA2D2	FGFR2	0.8708	co	1	442	010000110000001001000010100100000000000000000011100010000000001001001000001100000000000100010001011001000001000000010000010000010000010010010100011000010000000000000001101000001010000009000001700000001001000000010000100000000001000100001000010011110000100000010100007000100100100000070100700010000000100010000000000070000010000000000110000100000000107110011110000010000000011000000000011000001000001…	GTEx_normal	0.0002592	145
DUSP4	ACVRL1	0.6562	co	1	547	001110010000710000700111101101100101000001000107701100110001110000001000000000001170011100000007001700100010110001101110101010001010001100010000110101000000701000011110100101101100000019000000701010000001100011100100110700000000100170100107011001010100010011011171000101700000001100010001010710010101011071000011110070110110100100000101100010010017010000100100100001001110010100010000001170000101011…	TCGA-LUSC	0.0005608	146
ANXA5	ERO1L	0.6437	co	1	322	000000000000000000000000000000000000000000000000000010000000000000000000000000000008000000000000100000000000000000000000000000000080000800000000000000000000000000000000070000090000000009000000000000000000000000000000000000000000000000000000000000000000010000000000000100000000000000000000700000000000000000000001000000000000000000000000000000000000000000000000000100000000000000000000000000000000000…	TCGA-NORMAL	0.0003529	146
2020-09-04	EFS	0.6136	co	1	367	100111001011111000110010010001010110101100011010000101001100111110101111011100100010111100018000111110101101110100001001110010000001110101818111001011101010011010110001111000080011111019011110010101011100010001011100111110010101111011010011100010110111101001101100101111010011000000010110011111000001100000001111011100010110111000110110101100011108101011010110111111101101000011011110010110001111100…	TCGA-LUAD	1.071e-05	146
SLC7A11	ADAM23	0.652	co	1	403	000000000000000000000000000000000010000000001000000000000000000000000000000000000000000000100000000000000000000000000000000000000000000000000000000000000000000000000000000000000000000009000000000000000000000000001000000000000000000000000000000000000000001000000000000000000000000000000000100000000000000000000000000000000000000000000010000010000000000000000000000000000000000000000000000000000000000…	TCGA-LUSC	1.579e-08	146
NUSAP1	UBE2C	0.8706	co	1	565	000000110000011001000000101110110000000000010010100010001010101101011801111110000100100100010100111010100001100000010000000080001100110010010101011000100100001080100100100001000000001009000000000100001000100000000100010000000101810100010000000011000000110000110100101110100000100101000100801010000001100100000001000000110000000100000100000100001100010100101110800101001001811001080000011100001000011…	GTEx_normal	0.0002592	146
ALDH3B1	OSCAR	0.6501	co	1	402	000000000000000000000000000000000010101001000001000100000000000000000000000000000001000000800000000000000000000110000010000000000001000000000010000000000000010000000000000010000000000109000000000000110000010000101001000000000000000000000000001000001000001000000000000000001000000000000000000001000000000000000000000010000000000001000000000000000000000000000000100000000000100100000000000000100000000…	TCGA-LUSC	1.006e-10	147
KIF11	HMMR	0.8704	co	1	601	000000110000011001000110008110010000080000010010100010101010101101011011011110000100101100018100111000100001100010110001110000001100010010010100811000100100001000100100100001001000001009100000000100001001100110100100010000000101010100010000000011110000110010110100100110100001100101000100901010000801110100000011000000110011000100000100000100001100110110101110000101001081011001010010001000011000011…	GTEx_normal	0.000985	147
FGFR2	CAT	0.6435	co	1	315	000000000000000000000000000000000000000000000000000010000000100000000000000110000000000000000000000000000000000000000000000000000000010000010100000000000000000000000001000000000000000009000000700000000001000000000000001000000000000000000000000010000000100000000000007000000000000000070100700000000000000000000000000070000000000000000000000000000000007000000000000000000000000000000000000000000000000…	TCGA-NORMAL	0.0003529	147
CASR	TINAG	-0.6106	co	1	72	999999099911919999999909991990999999999999991999999999991109199999919997910099991999119799009199911999999999199991999999799999999099199999999909990999999990991999997999910091991019909999990999909799991999909109099991797999919999999099199999999991901199999971079909099979999099999901099999991109909101999090999999999999999119999999999901999099911719999999199909919999999999909999999999909999919009999…	TCGA-LUAD	1.833e-06	147
NAALAD2	PAICS	-0.6525	co	1	128	000000000000000100000000000000000010000001000000000101000000000000000000000000000000000010100000000000001000800100000110000000000000000000000000000000000000000000000000000000010000000009000000000010000800000000000800000000080000000101100100000000001000001000000000000000000000001000000000700000000000000000000800100010000008000001000000000000000000000000000008000010000000000100000000000081010000000…	TCGA-LUSC	6.175e-06	147
GPRIN3	SPOCK2	-0.6117	co	2	135	000001000010000010100000000000001010101000000001110000000000100000100000000001010001001010101000001010001100000100000000000100070100010000001001000000000110000100000000000000001001010009001001000000000000000010000000000700000001000101001000001100000001100000100010001000000000000000007010800000101000000111080001000011010000010000000000000001000000001000000001100000000000000000001010101111000001000…	TCGA-LUAD	0.000229	147
GTSE1	UBE2C	0.8703	co	1	593	000000110110011001000010181110110000000000010010101010001010101101011101011110000100100100010100111010100001100001010000000080011100110010010101011000100100001010100000100001100000001009000100000100001000100000000100100000000101810100010000000011000000110000110110101110100000100101000100801110000101100101000011000000110000100100000100000100001100010100101110100101001001811001000000011100001000011…	GTEx_normal	0.0002592	147
OLFML3	AOC3	0.6434	co	2	349	080000000000000001000000000000000000000000000000000010000000000000000000000000000100000000000000000000000000000000010000000000000000000000007000000000000000000000007000000000000000000009000000000000001001000000000000000000000000000000000000000000000000000000000000000000000000000000000100000000000000800000000000000008000000000000000000000000007000810010000000000118000000000000000000000000000000000…	TCGA-NORMAL	0.0003529	148
DRAM1	LAMP3	0.6434	co	1	275	000000000000000000000000000000000000000000000000000000000000000000000000000100000000000000000000000000000000000000000000000000000000000000000000000000000000000000000001000000000000001009000000700000000000000000000000100000000000000000000000000010000000100000000800000000000000000000000000900000000000000000000000000000000000000000000000000000000000000110000000000000000000000000070000000000000000000…	TCGA-NORMAL	0.0003529	148
TOP2A	TTK	0.8701	co	1	627	010000110100011001010110101111110001000100010010100010001010111101011111011110010100101100010100111011100001000000110000110000011100111010010101011000100100001000100000101001101000001009100101000100001000100110100100010000010101010100010000000011110000110000110110100111100001100101000100901010000101100100000011100000110010001100000110000100001100110110101110000101001001011001010010011100011000011…	GTEx_normal	0.000985	148
[truncated: 57,543 more rows]

## Sheet: Supplemental_Table2
Supplemental Table 2. GTEx lung gene regulatory network
TF	TargetGene	Prior	Multiplicity	Tissues
ELF4	FGR	0	1	lung,
ELK4	FGR	0	1	lung,
ETV3	FGR	0	1	lung,
NRF1	FGR	0	1	lung,
ELK4	FUCA2	0	1	lung,
GABPA	FUCA2	0	1	lung,
SMARCC2	FUCA2	0	1	lung,
USF1	FUCA2	0	1	lung,
[truncated: 99,355 more rows]

## Sheet: Supplemental_Table3
Supplemental Table 3. LUAD and LUSC Specific GRN Edge Attributes
[truncated: 6,010 more rows]

[truncated: 2 more sheets: Supplemental_Table4, Supplemental_Table5]
